# Supplementary material for: Differential Gene Expression and Allele Frequency Changes Favour Adaptation of a Heterogeneous Yeast Population to Nitrogen-Limited Fermentations
Source: Front Microbiol. 2020 Jun 15;11:1204. doi: 10.3389/fmicb.2020.01204 (PMC7307137; doi:10.3389/fmicb.2020.01204)
Supplement: Supplementary file 1 [file Table_1.XLSX]

## Sheet: Supp_Table_1
Supplementary Table 1. RNAseq expression levels.
Name	Type	Minimum	Maximum	Length	# intervals	Direction	Differential expression absolute confidence	Differential expression confidence	Differential expression log2 ratio	Differential expression p-value
THI4 CDS	Expression Difference	4519389	4520369	981	1	forward	93	-93	-8.2153	9.37891e-94
BAP3 CDS	Expression Difference	1908784	1910598	1815	1	reverse	104.7	-104.7	-6.34628	1.93807e-105
THI13 CDS	Expression Difference	1376226	1377248	1023	1	forward	13	-13	-4.86953	1.08556e-13
THI11 CDS	Expression Difference	6561035	6562057	1023	1	reverse	0	0	-4.86122	NA
THI5 CDS	Expression Difference	3481758	3482780	1023	1	forward	0	0	-4.73456	NA
THI12 CDS	Expression Difference	9262468	9263490	1023	1	forward	0	0	-4.65142	NA
THI22 CDS	Expression Difference	11901843	11903561	1719	1	forward	9.7	-9.7	-4.06639	2.21706e-10
URA1 CDS	Expression Difference	6603427	6604371	945	1	forward	52.8	-52.8	-3.98579	1.62391e-53
TAT2 CDS	Expression Difference	10318141	10319919	1779	1	forward	40.7	-40.7	-3.88493	2.21187e-41
PHO3 CDS	Expression Difference	657916	659319	1404	1	reverse	35.3	-35.3	-3.87436	5.46466e-36
AGP1 CDS	Expression Difference	1119420	1121321	1902	1	reverse	46.3	-46.3	-3.68134	4.72631e-47
THI73 CDS	Expression Difference	7402962	7404533	1572	1	reverse	33.5	-33.5	-3.64826	2.87528e-34
GNP1 CDS	Expression Difference	2826475	2828466	1992	1	reverse	19.6	-19.6	-3.63147	2.74458e-20
SNO2 CDS	Expression Difference	9259844	9260512	669	1	reverse	0	0	-3.5885	NA
SNO3 CDS	Expression Difference	3479130	3479798	669	1	reverse	0	0	-3.56273	NA
TIR1 CDS	Expression Difference	3067203	3067967	765	1	forward	19.5	-19.5	-3.48207	3.24969e-20
SNZ2 CDS	Expression Difference	9260903	9261799	897	1	forward	0	0	-3.46895	NA
THI21 CDS	Expression Difference	11176758	11178413	1656	1	reverse	15.4	-15.4	-3.45672	3.62804e-16
ARN2 CDS	Expression Difference	4838281	4840143	1863	1	reverse	12.5	-12.5	-3.44407	3.50169e-13
LYS20 CDS	Expression Difference	1493459	1494745	1287	1	forward	50.1	-50.1	-3.42481	7.47614e-51
AAD14 CDS	Expression Difference	9263754	9264884	1131	1	reverse	12.9	-12.9	-3.41747	1.14105e-13
PET18 CDS	Expression Difference	1197414	1198061	648	1	reverse	18.6	-18.6	-3.33632	2.63446e-19
SNZ3 CDS	Expression Difference	3480192	3481088	897	1	forward	0	0	-3.2399	NA
hypothetical protein CDS	Expression Difference	4027502	4028299	798	1	forward	13.4	-13.4	-3.13806	3.60799e-14
TAT1 CDS	Expression Difference	606792	608651	1860	1	reverse	24.1	-24.1	-3.05139	8.17857e-25
FMP23 CDS	Expression Difference	562051	562578	528	1	forward	30.9	-30.9	-3.00662	1.13882e-31
LEU9 CDS	Expression Difference	10554996	10556810	1815	1	forward	18.4	-18.4	-2.94495	4.38166e-19
DAN1 CDS	Expression Difference	6541272	6542168	897	1	reverse	9.7	-9.7	-2.94276	1.9675e-10
SWC7 CDS	Expression Difference	8138020	8138418	399	1	reverse	5.7	-5.7	-2.92557	1.97965e-06
SAM4 CDS	Expression Difference	11148347	11149324	978	1	forward	16.3	-16.3	-2.90253	4.94513e-17
VHR2 CDS	Expression Difference	3174660	3176177	1518	1	reverse	15.9	-15.9	-2.89372	1.2333e-16
MUP1 CDS	Expression Difference	4338407	4340131	1725	1	forward	15.1	-15.1	-2.83432	7.20423e-16
ARG3 CDS	Expression Difference	6101260	6102276	1017	1	forward	16.9	-16.9	-2.78787	1.14115e-17
HXT9 CDS	Expression Difference	5851958	5853661	1704	1	forward	7.7	-7.7	-2.71081	1.88813e-08
THI72 CDS	Expression Difference	10730737	10732536	1800	1	reverse	7	-7	-2.66906	9.7062e-08
THI2 CDS	Expression Difference	930708	932060	1353	1	reverse	14.8	-14.8	-2.64335	1.4802e-15
DLD3 CDS	Expression Difference	2908310	2909800	1491	1	forward	30.3	-30.3	-2.6419	5.18905e-31
RPL9A CDS	Expression Difference	3966744	3967319	576	1	reverse	9	-9	-2.63884	9.19992e-10
hypothetical protein CDS	Expression Difference	4981147	4981236	90	1	reverse	4.2	-4.2	-2.58783	6.63807e-05
ARO2 CDS	Expression Difference	3965389	3966519	1131	1	forward	17.7	-17.7	-2.5817	2.04687e-18
CIA2 CDS	Expression Difference	5183555	5184250	696	1	forward	13.5	-13.5	-2.57043	3.41634e-14
carbonyl reductase (NADPH-dependent) CDS	Expression Difference	2879686	2880720	1035	1	reverse	9.3	-9.3	-2.55599	4.92225e-10
ASN2 CDS	Expression Difference	4478934	4480652	1719	1	forward	16.6	-16.6	-2.54851	2.81528e-17
ARG8 CDS	Expression Difference	10090728	10091999	1272	1	forward	15.8	-15.8	-2.54195	1.58022e-16
RPS22A CDS	Expression Difference	5907371	5907763	393	1	reverse	10	-10	-2.51619	1.05568e-10
BNA4 CDS	Expression Difference	269363	270745	1383	1	forward	23.5	-23.5	-2.51166	3.20097e-24
BNA1 CDS	Expression Difference	6303599	6304132	534	1	reverse	10.4	-10.4	-2.49183	3.60189e-11
SNO1 CDS	Expression Difference	8780490	8781164	675	1	reverse	18.3	-18.3	-2.47279	4.93438e-19
RPL12A CDS	Expression Difference	2944676	2945173	498	1	reverse	13.6	-13.6	-2.46917	2.71571e-14
AIR1 CDS	Expression Difference	5603496	5604578	1083	1	reverse	11.3	-11.3	-2.46807	5.17901e-12
ICY2 CDS	Expression Difference	11197569	11197979	411	1	reverse	15.9	-15.9	-2.46339	1.20424e-16
hypothetical protein CDS	Expression Difference	3794269	3794805	537	1	forward	8.5	-8.5	-2.44872	2.9753e-09
RKI1 CDS	Expression Difference	10535521	10536297	777	1	reverse	15.2	-15.2	-2.42887	6.55784e-16
THI20 CDS	Expression Difference	10256389	10258044	1656	1	reverse	17.7	-17.7	-2.42074	1.98e-18
TRP3 CDS	Expression Difference	6614911	6616365	1455	1	reverse	16.1	-16.1	-2.41679	7.20579e-17
MEP3 CDS	Expression Difference	11934244	11935713	1470	1	reverse	32.4	-32.4	-2.4067	3.74047e-33
RPS18B CDS	Expression Difference	8546192	8547033	441	2	reverse	11.4	-11.4	-2.40655	4.29506e-12
ARO4 CDS	Expression Difference	947100	948212	1113	1	reverse	6.8	-6.8	-2.40462	1.55875e-07
RPS7A CDS	Expression Difference	10537763	10538736	573	2	forward	10.8	-10.8	-2.39691	1.53954e-11
MPC2 CDS	Expression Difference	5253002	5253391	390	1	forward	23.6	-23.6	-2.38465	2.73464e-24
CIT2 CDS	Expression Difference	1164348	1165730	1383	1	reverse	25.7	-25.7	-2.37813	1.79284e-26
RPS1B CDS	Expression Difference	8469687	8470454	768	1	forward	9.6	-9.6	-2.34725	2.582e-10
URA7 CDS	Expression Difference	374207	375946	1740	1	reverse	8.5	-8.5	-2.33352	3.15221e-09
RPP2B CDS	Expression Difference	2599514	2599846	333	1	forward	12	-12	-2.32683	1.0557e-12
SNZ1 CDS	Expression Difference	8781613	8782506	894	1	forward	14.7	-14.7	-2.31937	1.84037e-15
BAP2 CDS	Expression Difference	604079	605908	1830	1	reverse	9.1	-9.1	-2.31722	8.06364e-10
RPL16B CDS	Expression Difference	9741592	9742637	597	2	reverse	13.1	-13.1	-2.30888	7.49578e-14
RPS20 CDS	Expression Difference	4905342	4905707	366	1	forward	9.9	-9.9	-2.29061	1.20129e-10
RPA49 CDS	Expression Difference	9428997	9430244	1248	1	reverse	7.5	-7.5	-2.28096	3.02786e-08
RPL17A CDS	Expression Difference	6687481	6688341	555	2	forward	16.8	-16.8	-2.28015	1.48313e-17
RPS28B CDS	Expression Difference	7918159	7918362	204	1	forward	17.3	-17.3	-2.2801	4.79865e-18
ASC1 CDS	Expression Difference	8822661	8823893	960	2	reverse	10.9	-10.9	-2.27136	1.21006e-11
hypothetical protein CDS	Expression Difference	2899185	2899508	324	1	reverse	12.3	-12.3	-2.25195	5.16548e-13
GEX1 CDS	Expression Difference	1049881	1051728	1848	1	reverse	7.8	-7.8	-2.24732	1.51401e-08
RPL43B CDS	Expression Difference	6440766	6441319	279	2	forward	15.1	-15.1	-2.24052	7.45407e-16
RPS12 CDS	Expression Difference	11060163	11060594	432	1	reverse	8.3	-8.3	-2.21426	5.39083e-09
RPS0B CDS	Expression Difference	7487260	7488377	759	2	forward	17.6	-17.6	-2.20529	2.34492e-18
RPL25 CDS	Expression Difference	10112317	10113159	429	2	forward	18.8	-18.8	-2.1999	1.64954e-19
GRC3 CDS	Expression Difference	7313608	7315506	1899	1	forward	12.5	-12.5	-2.19493	3.30776e-13
CMR1 CDS	Expression Difference	1534940	1536508	1569	1	forward	13.4	-13.4	-2.19474	3.80534e-14
RRP3 CDS	Expression Difference	5057462	5058967	1506	1	reverse	6.2	-6.2	-2.18366	6.23455e-07
DUS3 CDS	Expression Difference	8167470	8169476	2007	1	reverse	12.7	-12.7	-2.17077	2.08021e-13
RPS9B CDS	Expression Difference	834726	835726	588	2	forward	8.8	-8.8	-2.16737	1.43357e-09
RPL11A CDS	Expression Difference	11854484	11855008	525	1	reverse	8.9	-8.9	-2.16496	1.24003e-09
BUD16 CDS	Expression Difference	2988813	2989751	939	1	reverse	7.9	-7.9	-2.15714	1.29032e-08
RPS21A CDS	Expression Difference	7129869	7130454	264	2	forward	10.2	-10.2	-2.1405	6.83114e-11
RPL6B CDS	Expression Difference	8273882	8274796	531	2	forward	16.8	-16.8	-2.13733	1.57362e-17
RPL23A CDS	Expression Difference	290040	290957	414	2	reverse	13.3	-13.3	-2.12096	4.63338e-14
RPS3 CDS	Expression Difference	9550316	9551038	723	1	forward	7.6	-7.6	-2.12084	2.32132e-08
GCD10 CDS	Expression Difference	9756412	9757848	1437	1	reverse	8.6	-8.6	-2.11609	2.39132e-09
RPL21A CDS	Expression Difference	836488	837358	483	2	forward	9.9	-9.9	-2.1089	1.38206e-10
RPP1A CDS	Expression Difference	1669824	1670144	321	1	reverse	10.4	-10.4	-2.10733	3.59598e-11
RPL2A CDS	Expression Difference	3689336	3690247	765	2	reverse	8.2	-8.2	-2.10505	6.18771e-09
RPL20A CDS	Expression Difference	9076430	9077425	519	2	mixed	10.1	-10.1	-2.10051	8.38489e-11
LEU4 CDS	Expression Difference	9672531	9674390	1860	1	reverse	13.6	-13.6	-2.09946	2.7282e-14
RPS4A CDS	Expression Difference	6534488	6535529	786	2	reverse	8.9	-8.9	-2.09148	1.4125e-09
ANB1 CDS	Expression Difference	6357369	6357842	474	1	reverse	6.2	-6.2	-2.08844	5.68601e-07
UTP13 CDS	Expression Difference	7824346	7826799	2454	1	reverse	10.5	-10.5	-2.08327	3.44165e-11
RPS17B CDS	Expression Difference	2714851	2715575	411	2	reverse	12.5	-12.5	-2.07507	3.05452e-13
GEX2 CDS	Expression Difference	7239654	7241501	1848	1	forward	3.8	-3.8	-2.06611	0.000149166
hypothetical protein CDS	Expression Difference	6468316	6469167	852	1	reverse	10.4	-10.4	-2.06318	4.01101e-11
YAT2 CDS	Expression Difference	3094147	3096918	2772	1	forward	10.7	-10.7	-2.05066	1.84492e-11
hypothetical protein CDS	Expression Difference	1127022	1127399	378	1	forward	6.4	-6.4	-2.03705	3.74089e-07
ATR1 CDS	Expression Difference	8361401	8363029	1629	1	forward	8	-8	-2.02827	9.60306e-09
KRE33 CDS	Expression Difference	9622957	9626127	3171	1	forward	6.8	-6.8	-2.0273	1.43761e-07
RPL42A CDS	Expression Difference	9578958	9579790	321	2	forward	14.5	-14.5	-2.02543	3.41799e-15
NOP14 CDS	Expression Difference	1548176	1550608	2433	1	reverse	7	-7	-2.01365	9.40414e-08
GLY1 CDS	Expression Difference	2959584	2960747	1164	1	reverse	10.8	-10.8	-2.01012	1.66135e-11
HIS1 CDS	Expression Difference	3156847	3157740	894	1	reverse	6.7	-6.7	-2.00608	1.82757e-07
RPL27A CDS	Expression Difference	4956451	4957422	411	2	forward	9.6	-9.6	-2.00576	2.42444e-10
STM1 CDS	Expression Difference	7685495	7686316	822	1	forward	7.9	-7.9	-2.00401	1.25009e-08
DRS1 CDS	Expression Difference	7376757	7379015	2259	1	forward	10.1	-10.1	-1.9999	8.25297e-11
RPS4B CDS	Expression Difference	5334406	5335460	786	2	reverse	13.5	-13.5	-1.9934	3.44398e-14
RPS6A CDS	Expression Difference	11500551	11501655	711	2	reverse	8.6	-8.6	-1.99287	2.5633e-09
ASN1 CDS	Expression Difference	11945880	11947598	1719	1	forward	6.5	-6.5	-1.99053	3.09215e-07
ASP1 CDS	Expression Difference	2468724	2469869	1146	1	forward	11.4	-11.4	-1.99047	3.88938e-12
RPL22A CDS	Expression Difference	7508222	7508976	366	2	forward	11.9	-11.9	-1.98805	1.14004e-12
THI6 CDS	Expression Difference	11271829	11273451	1623	1	reverse	8.8	-8.8	-1.98519	1.49975e-09
proline--tRNA ligase CDS	Expression Difference	4973926	4975992	2067	1	forward	6.7	-6.7	-1.9851	2.20377e-07
RBG1 CDS	Expression Difference	75043	76152	1110	1	reverse	10.5	-10.5	-1.9836	3.17567e-11
ARO10 CDS	Expression Difference	2594240	2596147	1908	1	forward	4.7	-4.7	-1.97451	2.0899e-05
RPS17A CDS	Expression Difference	8549094	8549902	411	2	forward	9.9	-9.9	-1.97411	1.12512e-10
RPS6B CDS	Expression Difference	821930	822992	711	2	reverse	8.8	-8.8	-1.97158	1.64717e-09
RPS19B CDS	Expression Difference	9309594	9310579	435	2	reverse	11.5	-11.5	-1.96782	3.46814e-12
ARG1 CDS	Expression Difference	10251180	10252442	1263	1	forward	16.7	-16.7	-1.96741	2.04631e-17
RPS11B CDS	Expression Difference	563049	564030	471	2	forward	11	-11	-1.96255	1.03794e-11
RPL38 CDS	Expression Difference	8026171	8026407	237	1	reverse	11.3	-11.3	-1.95847	5.17158e-12
RPS16B CDS	Expression Difference	1666948	1667811	432	2	reverse	6.7	-6.7	-1.95844	2.17907e-07
YMC2 CDS	Expression Difference	679885	680874	990	1	forward	7.8	-7.8	-1.95301	1.74078e-08
UTP21 CDS	Expression Difference	8179442	8182261	2820	1	reverse	15	-15	-1.95176	9.3125e-16
RPS8A CDS	Expression Difference	318741	319343	603	1	reverse	10.5	-10.5	-1.94817	3.45321e-11
RPL14A CDS	Expression Difference	7010118	7010932	417	2	forward	6.2	-6.2	-1.94631	6.58756e-07
RPL33B CDS	Expression Difference	10810524	10811374	324	2	reverse	24.1	-24.1	-1.94424	8.72569e-25
RPL42B CDS	Expression Difference	5211920	5212681	321	2	reverse	12.8	-12.8	-1.94174	1.65504e-13
SSU1 CDS	Expression Difference	11497053	11498429	1377	1	forward	5.8	-5.8	-1.94125	1.56359e-06
RPS8B CDS	Expression Difference	3255055	3255657	603	1	forward	8.2	-8.2	-1.93983	6.77776e-09
ARG2 CDS	Expression Difference	6138593	6140317	1725	1	forward	12.7	-12.7	-1.93971	2.09187e-13
hypothetical protein CDS	Expression Difference	7918856	7918972	117	1	reverse	9.7	-9.7	-1.9292	2.15148e-10
RPL24A CDS	Expression Difference	4176457	4176924	468	1	reverse	6.3	-6.3	-1.92427	5.37054e-07
RPS10B CDS	Expression Difference	9055619	9056346	318	2	forward	9.8	-9.8	-1.91316	1.6476e-10
TMT1 CDS	Expression Difference	3431419	3432318	900	1	reverse	8.1	-8.1	-1.91257	8.59175e-09
MAK16 CDS	Expression Difference	100225	101145	921	1	reverse	6.9	-6.9	-1.91177	1.30132e-07
RPS31 CDS	Expression Difference	7743975	7744433	459	1	forward	5.1	-5.1	-1.91155	7.42653e-06
ADE4 CDS	Expression Difference	9188764	9190296	1533	1	reverse	7.8	-7.8	-1.90798	1.50093e-08
RIB5 CDS	Expression Difference	957604	958320	717	1	reverse	7.1	-7.1	-1.90635	7.99398e-08
RPL11B CDS	Expression Difference	4387373	4387897	525	1	reverse	10.5	-10.5	-1.90274	3.21245e-11
RPA135 CDS	Expression Difference	11700845	11704456	3612	1	reverse	8.5	-8.5	-1.89552	3.35562e-09
RPS18A CDS	Expression Difference	2719945	2720820	441	2	forward	8.4	-8.4	-1.89328	4.09639e-09
ADH5 CDS	Expression Difference	763980	765035	1056	1	forward	5.9	-5.9	-1.88931	1.29016e-06
IRC18 CDS	Expression Difference	6209123	6209797	675	1	forward	3.2	-3.2	-1.88218	0.000594241
RPS10A CDS	Expression Difference	10899067	10899821	318	2	forward	9.1	-9.1	-1.87908	8.77796e-10
RPL17B CDS	Expression Difference	5923247	5924118	555	2	forward	6.5	-6.5	-1.87251	3.40681e-07
RPL31B CDS	Expression Difference	8176093	8176783	342	2	reverse	4.8	-4.8	-1.87052	1.66709e-05
RPL2B CDS	Expression Difference	5709341	5710505	765	2	forward	8.9	-8.9	-1.868	1.32748e-09
MTO1 CDS	Expression Difference	3792777	3794786	2010	1	reverse	9.2	-9.2	-1.86705	6.06103e-10
CIT3 CDS	Expression Difference	11679637	11681097	1461	1	forward	11.1	-11.1	-1.86506	8.10445e-12
RPL13B CDS	Expression Difference	8873411	8874412	600	2	reverse	7.5	-7.5	-1.85658	3.04817e-08
RPL24B CDS	Expression Difference	4526302	4526769	468	1	reverse	8.9	-8.9	-1.8497	1.16399e-09
HIS4 CDS	Expression Difference	1109336	1111735	2400	1	reverse	7.5	-7.5	-1.84811	3.08337e-08
MIS1 CDS	Expression Difference	641272	644199	2928	1	forward	5.3	-5.3	-1.84091	4.56114e-06
YVH1 CDS	Expression Difference	5797446	5798540	1095	1	reverse	5.8	-5.8	-1.83313	1.69265e-06
CTF13 CDS	Expression Difference	8779030	8780466	1437	1	forward	10.3	-10.3	-1.8329	5.08365e-11
RPS21B CDS	Expression Difference	5989011	5989734	264	2	reverse	9.7	-9.7	-1.81696	2.20908e-10
ROK1 CDS	Expression Difference	3921380	3923074	1695	1	forward	7.8	-7.8	-1.81529	1.63e-08
RPS24B CDS	Expression Difference	5624126	5624942	408	2	reverse	7.7	-7.7	-1.80802	2.19546e-08
hypothetical protein CDS	Expression Difference	6558245	6559285	1041	1	forward	18.9	-18.9	-1.80689	1.25045e-19
TRP2 CDS	Expression Difference	3229904	3231427	1524	1	forward	8.8	-8.8	-1.80527	1.5074e-09
RIB3 CDS	Expression Difference	2788376	2789002	627	1	reverse	8	-8	-1.80439	1.05686e-08
RPL1B CDS	Expression Difference	3993631	3994284	654	1	forward	8	-8	-1.80408	9.61638e-09
PUS1 CDS	Expression Difference	11274775	11276409	1635	1	reverse	7.2	-7.2	-1.79796	6.14464e-08
TSR2 CDS	Expression Difference	8251406	8252023	618	1	forward	8.1	-8.1	-1.79749	8.2538e-09
hypothetical protein CDS	Expression Difference	6952717	6953427	711	1	forward	6.8	-6.8	-1.79748	1.6604e-07
RPL18A CDS	Expression Difference	10125364	10126371	561	2	reverse	6.6	-6.6	-1.79685	2.49412e-07
RPL8A CDS	Expression Difference	4865185	4865955	771	1	reverse	13.8	-13.8	-1.79663	1.6375e-14
SYO1 CDS	Expression Difference	1698294	1700156	1863	1	reverse	6.1	-6.1	-1.79581	7.50203e-07
RRP5 CDS	Expression Difference	9049139	9054328	5190	1	reverse	5.6	-5.6	-1.7943	2.33625e-06
RPL35A CDS	Expression Difference	1477686	1478539	363	2	forward	8.9	-8.9	-1.79196	1.25303e-09
RPS26A CDS	Expression Difference	3887219	3887578	360	1	reverse	11.3	-11.3	-1.79067	4.78248e-12
DDI2 CDS	Expression Difference	3478374	3479051	678	1	forward	5.2	-5.2	-1.7905	6.23032e-06
ILV3 CDS	Expression Difference	6296912	6298669	1758	1	reverse	6.6	-6.6	-1.78962	2.67197e-07
RPL12B CDS	Expression Difference	2661638	2662135	498	1	forward	10.2	-10.2	-1.78856	6.91947e-11
RPL22B CDS	Expression Difference	3533072	3533761	369	2	reverse	15.2	-15.2	-1.78265	6.39604e-16
HOM2 CDS	Expression Difference	2130379	2131476	1098	1	forward	10.8	-10.8	-1.78243	1.67801e-11
ARO3 CDS	Expression Difference	1881838	1882950	1113	1	forward	7.7	-7.7	-1.77864	2.13677e-08
hypothetical protein CDS	Expression Difference	8490828	8490986	159	1	reverse	4.6	-4.6	-1.77733	2.62116e-05
RPS15 CDS	Expression Difference	10285118	10285546	429	1	reverse	12.1	-12.1	-1.77318	8.85023e-13
RPL8B CDS	Expression Difference	7292887	7293657	771	1	reverse	4.8	-4.8	-1.77218	1.67518e-05
RPS0A CDS	Expression Difference	4659565	4660778	759	2	forward	8.4	-8.4	-1.77106	3.69411e-09
MRM1 CDS	Expression Difference	10752439	10753677	1239	1	reverse	18.5	-18.5	-1.7702	3.19189e-19
RPL18B CDS	Expression Difference	9311206	9312198	561	2	reverse	10.3	-10.3	-1.7688	4.87632e-11
RPL5 CDS	Expression Difference	11426381	11427274	894	1	forward	6.9	-6.9	-1.76791	1.34957e-07
RPS11A CDS	Expression Difference	1851537	1852346	471	2	forward	12.4	-12.4	-1.76715	4.18399e-13
SER1 CDS	Expression Difference	10711326	10712513	1188	1	forward	8.2	-8.2	-1.76702	6.87593e-09
BNA6 CDS	Expression Difference	3713108	3713995	888	1	reverse	8.3	-8.3	-1.76427	5.08607e-09
gag-pol fusion protein CDS	Expression Difference	451548	456816	5268	2	forward	7.5	-7.5	-1.75255	3.4981e-08
RPL32 CDS	Expression Difference	276196	276588	393	1	forward	7.8	-7.8	-1.74981	1.47932e-08
BRX1 CDS	Expression Difference	10217817	10218692	876	1	reverse	5.7	-5.7	-1.74105	1.80408e-06
RPP2A CDS	Expression Difference	10286266	10286586	321	1	forward	8.2	-8.2	-1.74041	6.95885e-09
ARX1 CDS	Expression Difference	2015708	2017489	1782	1	reverse	7.7	-7.7	-1.73826	1.83804e-08
IMD4 CDS	Expression Difference	8485399	8487381	1575	2	reverse	5.1	-5.1	-1.73444	7.18933e-06
RPL36B CDS	Expression Difference	11198959	11199499	303	2	reverse	7.3	-7.3	-1.73419	4.94104e-08
RPC17 CDS	Expression Difference	6246746	6247231	486	1	reverse	8.9	-8.9	-1.73144	1.31805e-09
RPS2 CDS	Expression Difference	4016607	4017371	765	1	forward	5.4	-5.4	-1.73112	4.3665e-06
CAB1 CDS	Expression Difference	2858254	2859357	1104	1	forward	9.8	-9.8	-1.73017	1.5094e-10
OSW1 CDS	Expression Difference	10839240	10840076	837	1	forward	2.1	-2.1	-1.72304	0.00843108
RPS27B CDS	Expression Difference	4977801	4978599	249	2	reverse	9.6	-9.6	-1.72302	2.74914e-10
NIP7 CDS	Expression Difference	11276755	11277300	546	1	forward	5.5	-5.5	-1.72004	2.89021e-06
RPL3 CDS	Expression Difference	10476655	10477818	1164	1	forward	7.5	-7.5	-1.71887	3.05032e-08
hypothetical protein CDS	Expression Difference	9240784	9241101	318	1	reverse	6	-6	-1.71869	1.0737e-06
PRS4 CDS	Expression Difference	322632	323612	981	1	forward	9	-9	-1.71419	9.21793e-10
RPS26B CDS	Expression Difference	3315907	3316266	360	1	forward	4.4	-4.4	-1.71231	4.42211e-05
RPS25A CDS	Expression Difference	4273122	4273448	327	1	reverse	11.8	-11.8	-1.71159	1.77799e-12
SSB1 CDS	Expression Difference	1404087	1405928	1842	1	forward	8.7	-8.7	-1.71075	2.02752e-09
DPS1 CDS	Expression Difference	7354930	7356603	1674	1	reverse	9.8	-9.8	-1.70509	1.45338e-10
TIS11 CDS	Expression Difference	7660829	7661686	858	1	reverse	0	0	-1.70408	NA
gag-pol fusion protein CDS	Expression Difference	4556737	4562005	5268	2	reverse	7.6	-7.6	-1.70378	2.41424e-08
RPS19A CDS	Expression Difference	10123995	10124819	435	2	reverse	10.5	-10.5	-1.7029	2.85145e-11
gag-pol fusion protein CDS	Expression Difference	490087	495358	5271	2	forward	7.4	-7.4	-1.70277	3.69791e-08
RPL26B CDS	Expression Difference	4294802	4295662	384	2	forward	5.3	-5.3	-1.70118	5.41659e-06
TRZ1 CDS	Expression Difference	7165001	7167517	2517	1	reverse	5.3	-5.3	-1.69879	5.29618e-06
DIP2 CDS	Expression Difference	7644685	7647516	2832	1	forward	8	-8	-1.69821	9.8465e-09
FAA2 CDS	Expression Difference	3076496	3078730	2235	1	forward	7.2	-7.2	-1.69226	6.39972e-08
RSA4 CDS	Expression Difference	1284207	1285754	1548	1	reverse	9	-9	-1.69158	1.0076e-09
ARO9 CDS	Expression Difference	5205639	5207180	1542	1	forward	3.3	-3.3	-1.68702	0.000450988
RTT10 CDS	Expression Difference	11322755	11325796	3042	1	reverse	15.7	-15.7	-1.68696	2.07542e-16
RPS24A CDS	Expression Difference	3198278	3199151	408	2	forward	8.6	-8.6	-1.68527	2.2808e-09
RPS1A CDS	Expression Difference	8263169	8263936	768	1	reverse	6.9	-6.9	-1.68296	1.17214e-07
FMT1 CDS	Expression Difference	432274	433479	1206	1	forward	3.5	-3.5	-1.68067	0.000290965
NOC4 CDS	Expression Difference	11943025	11944683	1659	1	reverse	8.9	-8.9	-1.67622	1.2554e-09
RPL20B CDS	Expression Difference	10932219	10933163	519	2	mixed	7	-7	-1.67563	9.76843e-08
MAK5 CDS	Expression Difference	758535	760856	2322	1	forward	6.2	-6.2	-1.67546	6.29478e-07
THR4 CDS	Expression Difference	1260099	1261643	1545	1	forward	8.2	-8.2	-1.67407	6.49429e-09
ACO2 CDS	Expression Difference	5888905	5891274	2370	1	reverse	4.6	-4.6	-1.6711	2.56834e-05
SPO21 CDS	Expression Difference	10177303	10179132	1830	1	forward	5.1	-5.1	-1.66837	7.45025e-06
UTP4 CDS	Expression Difference	2474455	2476785	2331	1	reverse	9	-9	-1.66243	9.60867e-10
RPL13A CDS	Expression Difference	1668446	1669410	600	2	forward	6	-6	-1.66202	1.06933e-06
REC8 CDS	Expression Difference	11692596	11694638	2043	1	reverse	3.2	-3.2	-1.66171	0.000650035
THI74 CDS	Expression Difference	2698296	2699408	1113	1	forward	5.2	-5.2	-1.6585	5.62738e-06
STR2 CDS	Expression Difference	6497679	6499598	1920	1	reverse	6.5	-6.5	-1.65627	3.08995e-07
DED81 CDS	Expression Difference	4971824	4973488	1665	1	reverse	7.1	-7.1	-1.65619	8.11801e-08
FIT2 CDS	Expression Difference	11091500	11091961	462	1	forward	0	0	-1.65449	NA
PWP2 CDS	Expression Difference	1263859	1266630	2772	1	reverse	7.4	-7.4	-1.6537	4.39613e-08
ZTA1 CDS	Expression Difference	560725	561729	1005	1	reverse	16.8	-16.8	-1.65152	1.47105e-17
KRS1 CDS	Expression Difference	1885462	1887237	1776	1	forward	6.7	-6.7	-1.65113	1.999e-07
gag-pol fusion protein CDS	Expression Difference	8680564	8685832	5268	2	reverse	6.8	-6.8	-1.65025	1.58628e-07
arginine--tRNA ligase CDS	Expression Difference	2511825	2513648	1824	1	reverse	6	-6	-1.64922	9.80482e-07
PEX2 CDS	Expression Difference	5869380	5870195	816	1	forward	10.8	-10.8	-1.64901	1.46319e-11
RPS14B CDS	Expression Difference	5906248	5907072	417	2	forward	7.6	-7.6	-1.64816	2.38211e-08
RPL10 CDS	Expression Difference	7527955	7528620	666	1	forward	7.8	-7.8	-1.64736	1.53001e-08
TAL1 CDS	Expression Difference	8081378	8082385	1008	1	reverse	17.1	-17.1	-1.64385	8.52587e-18
PMU1 CDS	Expression Difference	6779096	6779983	888	1	reverse	19.4	-19.4	-1.64256	3.88309e-20
URA4 CDS	Expression Difference	8208813	8209907	1095	1	forward	7	-7	-1.64229	1.10833e-07
HIS5 CDS	Expression Difference	5535501	5536658	1158	1	forward	5.3	-5.3	-1.6406	4.86096e-06
RSM22 CDS	Expression Difference	6737668	6739554	1887	1	reverse	7.4	-7.4	-1.63882	3.82796e-08
gag-pol fusion protein CDS	Expression Difference	4275047	4280315	5268	2	forward	6.5	-6.5	-1.63878	2.85467e-07
RPS5 CDS	Expression Difference	6484362	6485039	678	1	forward	6.7	-6.7	-1.63782	1.94565e-07
RIX7 CDS	Expression Difference	7315661	7318174	2514	1	reverse	5.5	-5.5	-1.63772	3.3607e-06
PUF6 CDS	Expression Difference	2801455	2803425	1971	1	reverse	5.7	-5.7	-1.6374	2.08823e-06
RPL9B CDS	Expression Difference	9747317	9747892	576	1	forward	10.7	-10.7	-1.63289	2.00593e-11
gag-pol fusion protein CDS	Expression Difference	10627081	10632349	5268	2	forward	6.4	-6.4	-1.62907	3.63559e-07
FRE4 CDS	Expression Difference	9987587	9989746	2160	1	forward	0	0	-1.62521	NA
EMW1 CDS	Expression Difference	9292944	9295658	2715	1	reverse	13.5	-13.5	-1.62395	2.82838e-14
SSF1 CDS	Expression Difference	5059265	5060626	1362	1	forward	6.5	-6.5	-1.61694	2.88411e-07
RPL7A CDS	Expression Difference	4103325	4104986	735	3	reverse	6.6	-6.6	-1.61503	2.28908e-07
SHQ1 CDS	Expression Difference	5562555	5564078	1524	1	reverse	9.2	-9.2	-1.61493	6.10437e-10
ERV1 CDS	Expression Difference	4282543	4283195	570	2	forward	7.8	-7.8	-1.61342	1.44132e-08
RPS13 CDS	Expression Difference	1939480	1940474	456	2	forward	5.6	-5.6	-1.61195	2.44929e-06
hypothetical protein CDS	Expression Difference	7415010	7415309	300	1	reverse	1.9	-1.9	-1.60983	0.0113565
ADE5,7 CDS	Expression Difference	3795472	3797880	2409	1	forward	4.5	-4.5	-1.60907	3.00915e-05
FRE2 CDS	Expression Difference	6587303	6589438	2136	1	reverse	0	0	-1.60235	NA
RPL34A CDS	Expression Difference	3161378	3162140	366	2	reverse	7.1	-7.1	-1.59974	8.37039e-08
DBP3 CDS	Expression Difference	4099278	4100849	1572	1	reverse	5.2	-5.2	-1.59633	6.42849e-06
RPL37A CDS	Expression Difference	7767691	7768316	267	2	forward	5.8	-5.8	-1.59585	1.58561e-06
HIS7 CDS	Expression Difference	945025	946683	1659	1	reverse	6.5	-6.5	-1.59581	3.2496e-07
RPS29A CDS	Expression Difference	8143679	8143849	171	1	forward	5.6	-5.6	-1.5931	2.45789e-06
ECM16 CDS	Expression Difference	8846901	8850704	3804	1	forward	6.8	-6.8	-1.59204	1.59234e-07
PRO2 CDS	Expression Difference	10953504	10954874	1371	1	reverse	9.6	-9.6	-1.58803	2.3441e-10
RPL23B CDS	Expression Difference	3288724	3289608	414	2	forward	6.1	-6.1	-1.58707	7.0818e-07
HXT2 CDS	Expression Difference	8611284	8612909	1626	1	forward	2.9	-2.9	-1.58694	0.00113327
IDP1 CDS	Expression Difference	1694857	1696143	1287	1	forward	8.6	-8.6	-1.58276	2.24424e-09
RPL39 CDS	Expression Difference	5908394	5908935	156	2	forward	5.5	-5.5	-1.5745	2.85398e-06
EMG1 CDS	Expression Difference	7768660	7769418	759	1	forward	11.3	-11.3	-1.57429	4.74502e-12
RRB1 CDS	Expression Difference	8856368	8857903	1536	1	reverse	7.9	-7.9	-1.57407	1.30083e-08
RPL7B CDS	Expression Difference	11296412	11297962	735	3	forward	6.3	-6.3	-1.56658	5.00204e-07
PDH1 CDS	Expression Difference	11681645	11683195	1551	1	forward	5.9	-5.9	-1.56225	1.39601e-06
SPH1 CDS	Expression Difference	8005778	8007370	1593	1	reverse	9.2	-9.2	-1.56167	5.72406e-10
MAE1 CDS	Expression Difference	6960928	6962937	2010	1	reverse	8.7	-8.7	-1.55999	2.08709e-09
RPS16A CDS	Expression Difference	8875133	8876108	432	2	forward	6.5	-6.5	-1.55886	3.11914e-07
NOP13 CDS	Expression Difference	9555037	9556248	1212	1	reverse	5.5	-5.5	-1.55704	3.35863e-06
NOP7 CDS	Expression Difference	4434407	4436224	1818	1	forward	3.6	-3.6	-1.55234	0.000224045
GPI19 CDS	Expression Difference	2697374	2697796	423	1	forward	5.2	-5.2	-1.55164	6.24829e-06
RPL40A CDS	Expression Difference	5461281	5462101	387	2	forward	5.5	-5.5	-1.54908	3.36747e-06
THI7 CDS	Expression Difference	7857395	7859191	1797	1	forward	5.7	-5.7	-1.54898	1.94366e-06
RPA43 CDS	Expression Difference	10991171	10992151	981	1	reverse	5.4	-5.4	-1.54877	4.37148e-06
TRM11 CDS	Expression Difference	10117425	10118726	1302	1	reverse	4.9	-4.9	-1.54756	1.34917e-05
RPL34B CDS	Expression Difference	5648799	5649636	366	2	reverse	6.7	-6.7	-1.54739	1.81721e-07
TRP5 CDS	Expression Difference	4185402	4187525	2124	1	reverse	9	-9	-1.54655	1.00757e-09
DAK2 CDS	Expression Difference	3492252	3494027	1776	1	forward	3.7	-3.7	-1.54312	0.000193355
PPT1 CDS	Expression Difference	4475652	4477193	1542	1	reverse	6.3	-6.3	-1.54243	5.1806e-07
HIS3 CDS	Expression Difference	10753915	10754577	663	1	forward	5.1	-5.1	-1.54196	7.17052e-06
ALD5 CDS	Expression Difference	3195985	3197547	1563	1	forward	13.5	-13.5	-1.53784	3.36404e-14
UTP14 CDS	Expression Difference	8406295	8408994	2700	1	forward	6.2	-6.2	-1.53596	6.26759e-07
RPL35B CDS	Expression Difference	1577622	1578389	363	2	forward	6.8	-6.8	-1.53564	1.46145e-07
gag-pol fusion protein CDS	Expression Difference	7460468	7463935	3468	1	reverse	5.4	-5.4	-1.5344	4.13774e-06
NUC1 CDS	Expression Difference	5872655	5873644	990	1	reverse	11	-11	-1.53286	9.52453e-12
RPL30 CDS	Expression Difference	4178081	4178628	318	2	forward	4.7	-4.7	-1.53271	2.08914e-05
RPL21B CDS	Expression Difference	11529896	11530799	483	2	forward	7.2	-7.2	-1.53119	5.63221e-08
PWP1 CDS	Expression Difference	7788996	7790726	1731	1	forward	6.3	-6.3	-1.53092	4.96368e-07
NRT1 CDS	Expression Difference	10491449	10493245	1797	1	reverse	7	-7	-1.52822	1.08668e-07
URB2 CDS	Expression Difference	6342700	6346224	3525	1	reverse	6.6	-6.6	-1.52817	2.32696e-07
RPA190 CDS	Expression Difference	10992956	10997950	4995	1	forward	4	-4	-1.52498	9.63689e-05
IPI3 CDS	Expression Difference	9543596	9545263	1668	1	reverse	6.2	-6.2	-1.52424	6.20505e-07
SAS10 CDS	Expression Difference	1541208	1543040	1833	1	reverse	4.9	-4.9	-1.52421	1.23497e-05
RPL1A CDS	Expression Difference	11259050	11259703	654	1	forward	5.9	-5.9	-1.52324	1.1955e-06
HXT11 CDS	Expression Difference	10057242	10058945	1704	1	forward	2.9	-2.9	-1.52128	0.00122483
ESF2 CDS	Expression Difference	9970992	9971942	951	1	reverse	7.9	-7.9	-1.51883	1.12627e-08
RPS30B CDS	Expression Difference	10710160	10710762	192	2	reverse	9.9	-9.9	-1.51657	1.39661e-10
PUS7 CDS	Expression Difference	10822180	10824210	2031	1	reverse	4.5	-4.5	-1.51605	2.85374e-05
RPL31A CDS	Expression Difference	1682248	1683010	342	2	forward	4.6	-4.6	-1.51301	2.71028e-05
RPS14A CDS	Expression Difference	1220902	1221622	414	2	reverse	5.2	-5.2	-1.50956	5.7753e-06
RPL29 CDS	Expression Difference	3692087	3692266	180	1	reverse	8.6	-8.6	-1.50608	2.551e-09
RPC82 CDS	Expression Difference	12040337	12042301	1965	1	reverse	5.9	-5.9	-1.50378	1.39849e-06
MET22 CDS	Expression Difference	10238072	10239145	1074	1	reverse	6.5	-6.5	-1.50111	2.89569e-07
RRT14 CDS	Expression Difference	5509597	5510217	621	1	reverse	7.6	-7.6	-1.49986	2.61573e-08
NCL1 CDS	Expression Difference	402752	404806	2055	1	forward	18.4	-18.4	-1.49899	3.79015e-19
PYC2 CDS	Expression Difference	888925	892467	3543	1	reverse	9.7	-9.7	-1.49784	2.00793e-10
RPC40 CDS	Expression Difference	11869088	11870095	1008	1	reverse	7.5	-7.5	-1.49709	3.04906e-08
UTP8 CDS	Expression Difference	4486940	4489081	2142	1	reverse	6.1	-6.1	-1.49431	8.11004e-07
ILV1 CDS	Expression Difference	3220432	3222162	1731	1	forward	11.6	-11.6	-1.49167	2.78508e-12
MRT4 CDS	Expression Difference	7004454	7005164	711	1	forward	5.4	-5.4	-1.49028	3.78277e-06
HAS1 CDS	Expression Difference	9173279	9174796	1518	1	reverse	5.9	-5.9	-1.48872	1.40909e-06
NOC2 CDS	Expression Difference	10759481	10761613	2133	1	forward	4.8	-4.8	-1.48691	1.43633e-05
RPL33A CDS	Expression Difference	11405382	11406230	324	2	forward	6.3	-6.3	-1.48424	4.59856e-07
ILS1 CDS	Expression Difference	311261	314479	3219	1	reverse	6.2	-6.2	-1.48412	6.46923e-07
CPA2 CDS	Expression Difference	6462046	6465402	3357	1	reverse	5.3	-5.3	-1.48316	4.49014e-06
TRM13 CDS	Expression Difference	10115803	10117233	1431	1	forward	8.6	-8.6	-1.47804	2.61068e-09
RLP24 CDS	Expression Difference	7411565	7412164	600	1	forward	6.4	-6.4	-1.47537	3.88823e-07
ARP10 CDS	Expression Difference	2027026	2027880	855	1	forward	3.7	-3.7	-1.46914	0.000181044
ATP10 CDS	Expression Difference	8152107	8152946	840	1	forward	3.9	-3.9	-1.46911	0.000124181
hypothetical protein CDS	Expression Difference	5950423	5951286	864	1	reverse	3.4	-3.4	-1.46843	0.00037642
GGC1 CDS	Expression Difference	1463671	1464573	903	1	reverse	4.7	-4.7	-1.46842	1.96686e-05
hypothetical protein CDS	Expression Difference	5381130	5381429	300	1	reverse	2.3	-2.3	-1.46738	0.00525571
ERB1 CDS	Expression Difference	8691299	8693722	2424	1	reverse	3.7	-3.7	-1.46016	0.000192324
RPL27B CDS	Expression Difference	2761792	2762586	411	2	forward	7.6	-7.6	-1.45769	2.62427e-08
URA3 CDS	Expression Difference	3008122	3008925	804	1	forward	6.9	-6.9	-1.45767	1.25175e-07
URB1 CDS	Expression Difference	6989831	6995125	5295	1	reverse	3.9	-3.9	-1.45736	0.000124175
LYS1 CDS	Expression Difference	5812188	5813309	1122	1	reverse	5.9	-5.9	-1.45145	1.26292e-06
UTP22 CDS	Expression Difference	4401348	4405061	3714	1	forward	14.4	-14.4	-1.44882	3.68556e-15
PDC5 CDS	Expression Difference	7655751	7657442	1692	1	forward	3.7	-3.7	-1.44617	0.000215264
REI1 CDS	Expression Difference	970059	971240	1182	1	forward	7.8	-7.8	-1.44611	1.52283e-08
DHR2 CDS	Expression Difference	6867057	6869264	2208	1	forward	5.7	-5.7	-1.44481	1.8038e-06
PAM18 CDS	Expression Difference	7410605	7411111	507	1	reverse	11.7	-11.7	-1.44145	2.02026e-12
RPS23B CDS	Expression Difference	11918225	11919027	438	2	forward	5	-5	-1.43286	9.51668e-06
AAT1 CDS	Expression Difference	6815748	6817103	1356	1	forward	4.4	-4.4	-1.43104	4.44255e-05
RPL6A CDS	Expression Difference	8446432	8447377	531	2	reverse	5.5	-5.5	-1.43012	3.27457e-06
ENP1 CDS	Expression Difference	943222	944673	1452	1	reverse	6.4	-6.4	-1.42748	4.44095e-07
RPP1B CDS	Expression Difference	1589928	1590549	321	2	forward	8.6	-8.6	-1.42695	2.73347e-09
RPL19A CDS	Expression Difference	644404	645479	570	2	reverse	6.6	-6.6	-1.42651	2.34443e-07
RPL28 CDS	Expression Difference	4049957	4050917	450	2	forward	4.5	-4.5	-1.42337	2.83277e-05
IMD3 CDS	Expression Difference	8247585	8249156	1572	1	forward	4.1	-4.1	-1.42139	7.59251e-05
THR1 CDS	Expression Difference	4989368	4990441	1074	1	forward	7.7	-7.7	-1.41753	2.03026e-08
RPA12 CDS	Expression Difference	6387656	6388033	378	1	forward	7.4	-7.4	-1.41715	4.0855e-08
CLB6 CDS	Expression Difference	4444349	4445491	1143	1	reverse	4.1	-4.1	-1.41457	7.69108e-05
GTO1 CDS	Expression Difference	4535788	4536858	1071	1	reverse	8	-8	-1.41424	1.03741e-08
RPL37B CDS	Expression Difference	2810220	2810875	267	2	reverse	6.6	-6.6	-1.40598	2.4528e-07
NOC3 CDS	Expression Difference	7399371	7401362	1992	1	reverse	7.3	-7.3	-1.4058	4.9864e-08
TIR4 CDS	Expression Difference	10376304	10377767	1464	1	forward	3	-3	-1.40527	0.000926496
TYS1 CDS	Expression Difference	4605326	4606510	1185	1	reverse	7	-7	-1.40273	9.514e-08
GRX3 CDS	Expression Difference	2004200	2005057	858	1	reverse	10.2	-10.2	-1.40113	5.70369e-11
IMP3 CDS	Expression Difference	5223464	5224015	552	1	forward	5.3	-5.3	-1.40102	5.20494e-06
ENB1 CDS	Expression Difference	10051460	10053280	1821	1	reverse	2.9	-2.9	-1.39593	0.001176
hypothetical protein CDS	Expression Difference	1307408	1307869	462	1	reverse	3.5	-3.5	-1.39164	0.000351454
APT1 CDS	Expression Difference	8552142	8552705	564	1	forward	5.9	-5.9	-1.39074	1.37969e-06
MAL13 CDS	Expression Difference	4809283	4810704	1422	1	forward	13.4	-13.4	-1.37757	4.06315e-14
NSA1 CDS	Expression Difference	4038968	4040359	1392	1	forward	6.1	-6.1	-1.37408	7.21594e-07
RPL43A CDS	Expression Difference	11777426	11778107	279	2	forward	5	-5	-1.36916	1.03513e-05
TCA17 CDS	Expression Difference	2956664	2957122	459	1	reverse	5.9	-5.9	-1.36906	1.23111e-06
CBF5 CDS	Expression Difference	7751162	7752613	1452	1	forward	3.9	-3.9	-1.36793	0.000114876
RPL19B CDS	Expression Difference	398641	399594	570	2	forward	9.4	-9.4	-1.36764	4.04923e-10
NRP1 CDS	Expression Difference	1521017	1523176	2160	1	reverse	4.1	-4.1	-1.36764	8.26109e-05
ADY2 CDS	Expression Difference	1175675	1176526	852	1	reverse	2.7	-2.7	-1.36482	0.00209678
LYS4 CDS	Expression Difference	2291151	2293232	2082	1	forward	4.1	-4.1	-1.36331	8.77768e-05
TRM1 CDS	Expression Difference	2051571	2053283	1713	1	reverse	6.1	-6.1	-1.35987	8.70365e-07
hypothetical protein CDS	Expression Difference	11149871	11151424	1554	1	reverse	3.2	-3.2	-1.35515	0.000696405
hypothetical protein CDS	Expression Difference	2139065	2140228	1164	1	forward	6.7	-6.7	-1.35106	2.22077e-07
PSF2 CDS	Expression Difference	6137682	6138323	642	1	reverse	5.7	-5.7	-1.349	1.99707e-06
hypothetical protein CDS	Expression Difference	8527591	8528613	1023	1	reverse	2.6	-2.6	-1.34866	0.0023644
RPS25B CDS	Expression Difference	8040601	8040927	327	1	reverse	6.1	-6.1	-1.3454	8.27968e-07
HOP2 CDS	Expression Difference	4174615	4175341	657	2	forward	2	-2	-1.34113	0.0105149
LSG1 CDS	Expression Difference	4053621	4055543	1923	1	forward	7.4	-7.4	-1.34037	4.02332e-08
SPB1 CDS	Expression Difference	1074851	1077376	2526	1	forward	3.9	-3.9	-1.33431	0.000125692
hypothetical protein CDS	Expression Difference	4798005	4799030	1026	1	reverse	5.9	-5.9	-1.33275	1.22056e-06
RPL36A CDS	Expression Difference	8974350	8975115	303	2	forward	6.4	-6.4	-1.33031	3.62143e-07
NOP8 CDS	Expression Difference	10085067	10086521	1455	1	forward	5	-5	-1.32819	1.10826e-05
MCH2 CDS	Expression Difference	6584319	6585740	1422	1	forward	2.1	-2.1	-1.32455	0.00749013
RIX1 CDS	Expression Difference	5323826	5326117	2292	1	forward	4.4	-4.4	-1.32421	3.55761e-05
RPF2 CDS	Expression Difference	7169718	7170752	1035	1	reverse	3.8	-3.8	-1.32356	0.000159087
UTP15 CDS	Expression Difference	8777220	8778761	1542	1	forward	5.1	-5.1	-1.32256	8.87194e-06
IMP2 CDS	Expression Difference	8664347	8664880	534	1	forward	9.8	-9.8	-1.32201	1.50305e-10
KEL3 CDS	Expression Difference	11167811	11169766	1956	1	reverse	9.7	-9.7	-1.3181	1.7915e-10
NOP1 CDS	Expression Difference	1787386	1788369	984	1	forward	5.3	-5.3	-1.31333	4.64116e-06
TAH18 CDS	Expression Difference	11782442	11784313	1872	1	forward	7.4	-7.4	-1.31077	3.54941e-08
MAK21 CDS	Expression Difference	1930671	1933748	3078	1	forward	4.8	-4.8	-1.31	1.46303e-05
DDI3 CDS	Expression Difference	9259088	9259765	678	1	forward	3.6	-3.6	-1.30786	0.000255411
NMD3 CDS	Expression Difference	5273758	5275314	1557	1	forward	4.2	-4.2	-1.30675	5.68351e-05
POP3 CDS	Expression Difference	9355323	9355910	588	1	forward	6.6	-6.6	-1.30673	2.6117e-07
TIR2 CDS	Expression Difference	10378164	10378919	756	1	reverse	4	-4	-1.30613	9.47992e-05
ADD66 CDS	Expression Difference	6627218	6628021	804	1	reverse	5.5	-5.5	-1.30353	2.94897e-06
putative mannitol dehydrogenase CDS	Expression Difference	10022428	10023936	1509	1	reverse	2.2	-2.2	-1.30335	0.00657068
BFR2 CDS	Expression Difference	2419649	2421253	1605	1	forward	4.5	-4.5	-1.30302	3.03218e-05
RPL14B CDS	Expression Difference	4934207	4935021	417	2	forward	9.1	-9.1	-1.30136	8.25351e-10
PRO1 CDS	Expression Difference	2421527	2422813	1287	1	reverse	5.2	-5.2	-1.30079	6.23008e-06
RPL41B CDS	Expression Difference	1581746	1581823	78	1	reverse	3.5	-3.5	-1.29882	0.00029539
NOG1 CDS	Expression Difference	11494238	11496181	1944	1	forward	4.8	-4.8	-1.29564	1.41475e-05
hypothetical protein CDS	Expression Difference	845421	846074	654	1	reverse	9.6	-9.6	-1.29563	2.8136e-10
GAL3 CDS	Expression Difference	1823456	1825018	1563	1	forward	4.6	-4.6	-1.29415	2.73001e-05
CLN2 CDS	Expression Difference	11188237	11189874	1638	1	reverse	6.5	-6.5	-1.29398	3.23135e-07
HOM3 CDS	Expression Difference	3148330	3149913	1584	1	reverse	6.5	-6.5	-1.29098	3.22251e-07
FET3 CDS	Expression Difference	8712027	8713937	1911	1	forward	0	0	-1.2908	NA
RPL26A CDS	Expression Difference	8064340	8065170	384	2	forward	5.8	-5.8	-1.2852	1.64966e-06
gag-pol fusion protein CDS	Expression Difference	9344600	9349868	5268	2	reverse	4.4	-4.4	-1.28369	3.55655e-05
NOP56 CDS	Expression Difference	7791125	7792639	1515	1	forward	2.8	-2.8	-1.28351	0.00158935
NOG2 CDS	Expression Difference	9968756	9970748	1461	2	reverse	4.4	-4.4	-1.28216	3.55064e-05
LYS21 CDS	Expression Difference	1587415	1588737	1323	1	forward	7.8	-7.8	-1.28063	1.69686e-08
POS5 CDS	Expression Difference	11314666	11315910	1245	1	forward	6	-6	-1.27941	9.57319e-07
hypothetical protein CDS	Expression Difference	3850690	3850995	306	1	reverse	4.4	-4.4	-1.27839	4.16234e-05
gag-pol fusion protein CDS	Expression Difference	3384811	3390079	5268	2	reverse	4.5	-4.5	-1.27762	3.52565e-05
CFD1 CDS	Expression Difference	5741695	5742576	882	1	forward	4.9	-4.9	-1.27637	1.24435e-05
hypothetical protein CDS	Expression Difference	8098489	8098746	258	1	forward	4.8	-4.8	-1.27132	1.47105e-05
RPS28A CDS	Expression Difference	10680773	10680976	204	1	reverse	5	-5	-1.27074	1.0183e-05
PRP43 CDS	Expression Difference	4020624	4022927	2304	1	reverse	4.4	-4.4	-1.26999	3.91831e-05
PCL5 CDS	Expression Difference	5066934	5067623	690	1	forward	5.3	-5.3	-1.26663	4.54491e-06
hypothetical protein CDS	Expression Difference	10374826	10375050	225	1	reverse	1.6	-1.6	-1.26616	0.0237543
PDR10 CDS	Expression Difference	10963772	10968466	4695	1	forward	10.4	-10.4	-1.26566	3.8795e-11
URA2 CDS	Expression Difference	5998184	6004828	6645	1	reverse	8.2	-8.2	-1.26254	6.99713e-09
NCA3 CDS	Expression Difference	6026321	6027334	1014	1	reverse	8.3	-8.3	-1.26036	4.50952e-09
RPB5 CDS	Expression Difference	778580	779227	648	1	reverse	7.3	-7.3	-1.26012	5.33342e-08
WRS1 CDS	Expression Difference	10168496	10169794	1299	1	reverse	4.3	-4.3	-1.25503	4.69581e-05
REE1 CDS	Expression Difference	5855594	5856190	597	1	forward	4.5	-4.5	-1.25436	3.40347e-05
ATF2 CDS	Expression Difference	4587819	4589426	1608	1	reverse	6.4	-6.4	-1.2536	4.31419e-07
PCL1 CDS	Expression Difference	9335533	9336372	840	1	forward	2.4	-2.4	-1.2501	0.00388542
TMA46 CDS	Expression Difference	10525402	10526439	1038	1	forward	4.4	-4.4	-1.24987	3.76721e-05
SRL4 CDS	Expression Difference	11610622	11611467	846	1	reverse	1.7	-1.7	-1.24753	0.0179556
RPS23A CDS	Expression Difference	4465964	4466720	438	2	forward	5.2	-5.2	-1.24362	6.69044e-06
IMA2 CDS	Expression Difference	10054494	10056263	1770	1	reverse	2.7	-2.7	-1.24362	0.00207259
ERP3 CDS	Expression Difference	1782855	1783532	678	1	reverse	4.8	-4.8	-1.24313	1.55603e-05
gag-pol fusion protein CDS	Expression Difference	8696262	8701530	5268	2	reverse	4.2	-4.2	-1.24196	5.76196e-05
STB6 CDS	Expression Difference	6877794	6880094	2301	1	forward	8.8	-8.8	-1.24154	1.47262e-09
MRPL20 CDS	Expression Difference	7177306	7177893	588	1	reverse	11.5	-11.5	-1.24006	2.93597e-12
DCD1 CDS	Expression Difference	5217718	5218656	939	1	reverse	5	-5	-1.2397	9.87978e-06
VFA1 CDS	Expression Difference	3307814	3308425	612	1	forward	8.6	-8.6	-1.23876	2.42199e-09
RPL4A CDS	Expression Difference	530384	531472	1089	1	forward	5.3	-5.3	-1.23712	4.69044e-06
GUA1 CDS	Expression Difference	9024995	9026572	1578	1	forward	3.5	-3.5	-1.23621	0.000321966
hypothetical protein CDS	Expression Difference	5918121	5919956	1836	1	forward	5.3	-5.3	-1.23559	4.71075e-06
hypothetical protein CDS	Expression Difference	1605155	1605604	450	1	reverse	3	-3	-1.23388	0.000903958
SQT1 CDS	Expression Difference	5771059	5772354	1296	1	forward	6.3	-6.3	-1.23158	5.03289e-07
gag-pol fusion protein CDS	Expression Difference	11974249	11979517	5268	2	reverse	6.3	-6.3	-1.228	4.52133e-07
CAF4 CDS	Expression Difference	7086914	7088845	1932	1	reverse	6.1	-6.1	-1.22738	7.76213e-07
ADE13 CDS	Expression Difference	8089310	8090758	1449	1	forward	3.3	-3.3	-1.22723	0.000512178
UTP18 CDS	Expression Difference	6143383	6145167	1785	1	reverse	5.4	-5.4	-1.22714	4.458e-06
NOP10 CDS	Expression Difference	5071594	5071770	177	1	forward	4.6	-4.6	-1.22526	2.46404e-05
RPP0 CDS	Expression Difference	8050915	8051853	939	1	forward	5.2	-5.2	-1.22433	7.06047e-06
NOP9 CDS	Expression Difference	6250023	6252023	2001	1	reverse	5.9	-5.9	-1.2195	1.21642e-06
OAC1 CDS	Expression Difference	6795556	6796530	975	1	forward	5.2	-5.2	-1.21912	6.33856e-06
CDC60 CDS	Expression Difference	11370250	11373522	3273	1	forward	5.1	-5.1	-1.21891	8.63848e-06
RRS1 CDS	Expression Difference	10900309	10900920	612	1	forward	7.9	-7.9	-1.21861	1.27097e-08
ALB1 CDS	Expression Difference	6022177	6022704	528	1	forward	6.4	-6.4	-1.21665	3.71834e-07
MAG2 CDS	Expression Difference	8233456	8235468	2013	1	forward	10.9	-10.9	-1.2166	1.25781e-11
SWF1 CDS	Expression Difference	2063256	2064266	1011	1	forward	4.6	-4.6	-1.21507	2.29489e-05
RIB4 CDS	Expression Difference	10086564	10087073	510	1	reverse	5.7	-5.7	-1.21425	2.01991e-06
RPL16A CDS	Expression Difference	5491100	5491989	600	2	reverse	5.6	-5.6	-1.21267	2.62732e-06
hypothetical protein CDS	Expression Difference	1534254	1534610	357	1	reverse	3.8	-3.8	-1.21226	0.000165843
DSF1 CDS	Expression Difference	2911544	2913052	1509	1	forward	1.9	-1.9	-1.21082	0.0136008
TRM5 CDS	Expression Difference	5064811	5066310	1500	1	forward	6.8	-6.8	-1.20997	1.59686e-07
RPL41A CDS	Expression Difference	1490429	1490506	78	1	reverse	3.2	-3.2	-1.2077	0.000609457
RRP9 CDS	Expression Difference	11925619	11927340	1722	1	forward	6	-6	-1.20715	1.0856e-06
hypothetical protein CDS	Expression Difference	6310805	6316073	5268	2	forward	4.2	-4.2	-1.20466	6.42115e-05
hypothetical protein CDS	Expression Difference	2154596	2154745	150	1	reverse	1.3	-1.3	-1.20466	0.0509458
RPL40B CDS	Expression Difference	7196208	7196962	387	2	reverse	3.7	-3.7	-1.20161	0.000191823
NOP4 CDS	Expression Difference	11593199	11595256	2058	1	forward	3.5	-3.5	-1.19642	0.000349668
PPM2 CDS	Expression Difference	10088421	10090508	2088	1	forward	2.5	-2.5	-1.19639	0.00327402
hypothetical protein CDS	Expression Difference	4549217	4549495	279	1	forward	4.3	-4.3	-1.19589	4.63227e-05
RPL4B CDS	Expression Difference	1831875	1832963	1089	1	forward	4.7	-4.7	-1.19583	2.10848e-05
ADE8 CDS	Expression Difference	2648237	2648881	645	1	reverse	3.3	-3.3	-1.19562	0.000507432
TEF1 CDS	Expression Difference	11823854	11825230	1377	1	forward	7.7	-7.7	-1.19555	1.99328e-08
VPS9 CDS	Expression Difference	8401540	8402895	1356	1	reverse	4.9	-4.9	-1.1947	1.2722e-05
MRPL10 CDS	Expression Difference	9350770	9351738	969	1	reverse	13.2	-13.2	-1.19353	5.92423e-14
FTR1 CDS	Expression Difference	3352481	3353695	1215	1	reverse	1.9	-1.9	-1.19271	0.013172
YAT1 CDS	Expression Difference	190193	192256	2064	1	forward	2.3	-2.3	-1.19268	0.00513374
AAD3 CDS	Expression Difference	1357292	1358383	1092	1	forward	4.8	-4.8	-1.19011	1.6713e-05
RPL15A CDS	Expression Difference	7447004	7447618	615	1	reverse	2.8	-2.8	-1.18729	0.00164784
NDE2 CDS	Expression Difference	1663233	1664870	1638	1	forward	1.9	-1.9	-1.18722	0.0129428
NHP2 CDS	Expression Difference	1447534	1448004	471	1	forward	4.3	-4.3	-1.18711	5.11713e-05
gag-pol fusion protein CDS	Expression Difference	2238681	2243949	5268	2	reverse	5	-5	-1.18559	9.81513e-06
RPC10 CDS	Expression Difference	5217163	5217375	213	1	forward	8.4	-8.4	-1.18187	3.69613e-09
RPC53 CDS	Expression Difference	1543365	1544633	1269	1	forward	5.5	-5.5	-1.18185	3.0451e-06
ESF1 CDS	Expression Difference	2564519	2566405	1887	1	reverse	5	-5	-1.17887	1.02317e-05
PPR1 CDS	Expression Difference	7417296	7420010	2715	1	reverse	7.4	-7.4	-1.1782	4.04035e-08
COS9 CDS	Expression Difference	6592697	6593920	1224	1	forward	4.9	-4.9	-1.17791	1.25512e-05
CMC4 CDS	Expression Difference	8975799	8976092	222	2	reverse	4.6	-4.6	-1.17676	2.7099e-05
DUS1 CDS	Expression Difference	8432011	8433282	1272	1	forward	4.3	-4.3	-1.17168	5.21123e-05
NOP2 CDS	Expression Difference	9758176	9760032	1857	1	forward	3.1	-3.1	-1.17	0.000767806
MTM1 CDS	Expression Difference	4745195	4746295	1101	1	reverse	14.4	-14.4	-1.1685	3.77406e-15
POP1 CDS	Expression Difference	9478704	9481331	2628	1	reverse	6.5	-6.5	-1.16842	3.13295e-07
URE2 CDS	Expression Difference	9466773	9467837	1065	1	reverse	5.3	-5.3	-1.16608	5.5148e-06
DBP9 CDS	Expression Difference	7940074	7941858	1785	1	reverse	3.5	-3.5	-1.16581	0.00035096
NSA2 CDS	Expression Difference	3305349	3306134	786	1	reverse	3.5	-3.5	-1.16564	0.000347906
MTD1 CDS	Expression Difference	7168607	7169569	963	1	forward	3.8	-3.8	-1.16551	0.000157712
GFD2 CDS	Expression Difference	1102428	1104128	1701	1	forward	4.4	-4.4	-1.16511	3.67066e-05
SRD1 CDS	Expression Difference	1191640	1192305	666	1	reverse	2.9	-2.9	-1.16154	0.0012621
TEF2 CDS	Expression Difference	707889	709265	1377	1	forward	7.1	-7.1	-1.15962	8.03201e-08
GCD7 CDS	Expression Difference	7963345	7964490	1146	1	reverse	6.4	-6.4	-1.15881	3.99853e-07
hypothetical protein CDS	Expression Difference	6485353	6486699	1347	1	reverse	7	-7	-1.15119	9.59564e-08
AAP1 CDS	Expression Difference	5028670	5031240	2571	1	reverse	4.4	-4.4	-1.14978	4.3476e-05
SSB2 CDS	Expression Difference	9499695	9501536	1842	1	forward	4.9	-4.9	-1.14921	1.20317e-05
gag-pol fusion protein CDS	Expression Difference	8507666	8512934	5268	2	forward	4.5	-4.5	-1.14835	2.90644e-05
gag-pol fusion protein CDS	Expression Difference	11967969	11973240	5271	2	forward	4.6	-4.6	-1.14573	2.66132e-05
gag-pol fusion protein CDS	Expression Difference	2456086	2461354	5268	2	forward	4.6	-4.6	-1.14412	2.26204e-05
ARO1 CDS	Expression Difference	2064506	2069272	4767	1	forward	5.9	-5.9	-1.14327	1.13625e-06
FUI1 CDS	Expression Difference	368559	370478	1920	1	reverse	11	-11	-1.14267	9.99466e-12
RDS1 CDS	Expression Difference	1354360	1356858	2499	1	forward	4.5	-4.5	-1.14033	3.53463e-05
TRM9 CDS	Expression Difference	8566430	8567269	840	1	forward	4.9	-4.9	-1.1387	1.16088e-05
YHM2 CDS	Expression Difference	9075166	9076110	945	1	forward	4.5	-4.5	-1.13713	2.91783e-05
hypothetical protein CDS	Expression Difference	9947326	9948096	771	1	forward	6.2	-6.2	-1.13413	5.96407e-07
IMA3 CDS	Expression Difference	5409357	5411126	1770	1	reverse	2.2	-2.2	-1.1333	0.00695492
IMA4 CDS	Expression Difference	5849228	5850997	1770	1	reverse	2.2	-2.2	-1.1333	0.00695492
NSR1 CDS	Expression Difference	4545402	4546646	1245	1	reverse	3.9	-3.9	-1.13179	0.000140975
GDH1 CDS	Expression Difference	11073647	11075011	1365	1	reverse	5.5	-5.5	-1.13178	3.15185e-06
ORT1 CDS	Expression Difference	10601898	10602776	879	1	reverse	2.5	-2.5	-1.13113	0.00304103
URA10 CDS	Expression Difference	9130070	9130753	684	1	reverse	4.2	-4.2	-1.12979	6.88923e-05
MZM1 CDS	Expression Difference	2796239	2796610	372	1	forward	6.8	-6.8	-1.12723	1.66741e-07
IMA1 CDS	Expression Difference	4806212	4807981	1770	1	reverse	6	-6	-1.12677	9.8797e-07
ELP3 CDS	Expression Difference	11508033	11509706	1674	1	reverse	3.5	-3.5	-1.12636	0.0003344
PPT2 CDS	Expression Difference	11395554	11396075	522	1	reverse	4.4	-4.4	-1.1263	4.33104e-05
RRP12 CDS	Expression Difference	11652983	11656669	3687	1	forward	3.5	-3.5	-1.12478	0.000321332
RRP8 CDS	Expression Difference	1972095	1973273	1179	1	forward	3.5	-3.5	-1.12427	0.000286366
LCP5 CDS	Expression Difference	3306436	3307509	1074	1	forward	4	-4	-1.12296	9.94548e-05
ILV5 CDS	Expression Difference	8083094	8084281	1188	1	reverse	6.7	-6.7	-1.12219	2.1606e-07
hypothetical protein CDS	Expression Difference	1490893	1491855	963	1	reverse	5.7	-5.7	-1.11986	2.14283e-06
SER2 CDS	Expression Difference	4650873	4651802	930	1	forward	3.4	-3.4	-1.11842	0.000421493
LYS2 CDS	Expression Difference	699966	704144	4179	1	reverse	4.2	-4.2	-1.11572	6.3318e-05
RPS22B CDS	Expression Difference	8101470	8102345	393	2	forward	5.6	-5.6	-1.11498	2.34133e-06
MRD1 CDS	Expression Difference	11872516	11875179	2664	1	reverse	3.2	-3.2	-1.11397	0.000616871
EBP2 CDS	Expression Difference	6703971	6705254	1284	1	forward	4.2	-4.2	-1.11224	7.06154e-05
ADE17 CDS	Expression Difference	8830707	8832485	1779	1	reverse	2.3	-2.3	-1.10782	0.00487694
TMA19 CDS	Expression Difference	6912624	6913127	504	1	reverse	3.3	-3.3	-1.10708	0.000539161
BAS1 CDS	Expression Difference	7214063	7216498	2436	1	forward	4.8	-4.8	-1.10691	1.74467e-05
BIO5 CDS	Expression Difference	9979254	9980939	1686	1	reverse	6.8	-6.8	-1.10535	1.64553e-07
UTP6 CDS	Expression Difference	2717602	2718924	1323	1	reverse	4.4	-4.4	-1.1034	3.82738e-05
EST2 CDS	Expression Difference	8011570	8014224	2655	1	forward	4.5	-4.5	-1.10272	3.50456e-05
MCT1 CDS	Expression Difference	10788445	10789527	1083	1	reverse	5.2	-5.2	-1.10232	6.65515e-06
EFM1 CDS	Expression Difference	4851713	4853470	1758	1	forward	7.5	-7.5	-1.10214	3.32074e-08
RPS29B CDS	Expression Difference	1700650	1700820	171	1	reverse	4.6	-4.6	-1.10064	2.2956e-05
LOS1 CDS	Expression Difference	6628263	6631565	3303	1	forward	5.2	-5.2	-1.10036	6.80093e-06
CAF16 CDS	Expression Difference	3548173	3549042	870	1	reverse	4.8	-4.8	-1.10028	1.60168e-05
FRE6 CDS	Expression Difference	7282361	7284499	2139	1	reverse	7.9	-7.9	-1.1002	1.33005e-08
hypothetical protein CDS	Expression Difference	6305221	6310489	5268	2	forward	4.7	-4.7	-1.09964	2.22108e-05
TIR3 CDS	Expression Difference	5726300	5727109	810	1	forward	2.7	-2.7	-1.09812	0.00219968
PDX3 CDS	Expression Difference	536487	537173	687	1	reverse	4.2	-4.2	-1.09715	6.51307e-05
ILV6 CDS	Expression Difference	1148021	1148950	930	1	reverse	3.7	-3.7	-1.09465	0.000198677
ECL1 CDS	Expression Difference	4523213	4523848	636	1	reverse	4.1	-4.1	-1.09287	8.84095e-05
RMT2 CDS	Expression Difference	2753358	2754596	1239	1	reverse	2.4	-2.4	-1.09082	0.00370475
truncated gag-pol fusion protein CDS	Expression Difference	160597	164187	3591	1	reverse	4.1	-4.1	-1.09052	8.77295e-05
MRK1 CDS	Expression Difference	1672973	1674770	1506	2	reverse	3.3	-3.3	-1.0898	0.000491666
PKP2 CDS	Expression Difference	4131213	4132688	1476	1	forward	4.6	-4.6	-1.08277	2.74381e-05
DBP8 CDS	Expression Difference	5272111	5273406	1296	1	forward	4.5	-4.5	-1.07821	3.02578e-05
UTP11 CDS	Expression Difference	6833932	6834684	753	1	reverse	3	-3	-1.07712	0.00108254
ENP2 CDS	Expression Difference	4520757	4522880	2124	1	forward	2.3	-2.3	-1.0744	0.00504261
UTP10 CDS	Expression Difference	6044461	6049770	5310	1	reverse	3.1	-3.1	-1.07324	0.000769054
CAT2 CDS	Expression Difference	8515993	8518005	2013	1	forward	2.1	-2.1	-1.07066	0.00854078
CDC45 CDS	Expression Difference	7589017	7590969	1953	1	reverse	4.2	-4.2	-1.0706	6.14232e-05
hypothetical protein CDS	Expression Difference	757243	758256	1014	1	reverse	6.3	-6.3	-1.06828	5.48754e-07
VAS1 CDS	Expression Difference	4411176	4414490	3315	1	forward	4.2	-4.2	-1.06794	6.55802e-05
SUR4 CDS	Expression Difference	8112382	8113419	1038	1	forward	3.4	-3.4	-1.06513	0.000402536
JEN1 CDS	Expression Difference	6600446	6602296	1851	1	forward	2.2	-2.2	-1.06311	0.00658277
ARG7 CDS	Expression Difference	8718259	8719584	1326	1	reverse	3.5	-3.5	-1.06116	0.000289375
OLA1 CDS	Expression Difference	520899	522083	1185	1	reverse	3.3	-3.3	-1.061	0.000530167
LIA1 CDS	Expression Difference	6402082	6403059	978	1	reverse	3.4	-3.4	-1.06053	0.000367394
FUN30 CDS	Expression Difference	114919	118314	3396	1	forward	7.1	-7.1	-1.06048	7.4089e-08
MPS2 CDS	Expression Difference	4105915	4107078	1164	1	reverse	7.5	-7.5	-1.06026	3.1444e-08
RRN11 CDS	Expression Difference	8513449	8514972	1524	1	reverse	3.6	-3.6	-1.0599	0.000241122
dipeptidyl-peptidase III CDS	Expression Difference	10252736	10254871	2136	1	forward	4.8	-4.8	-1.0599	1.66448e-05
ARG4 CDS	Expression Difference	4969941	4971332	1392	1	reverse	3.4	-3.4	-1.05747	0.000412093
RET1 CDS	Expression Difference	10761977	10765426	3450	1	reverse	4	-4	-1.05719	9.86425e-05
COX10 CDS	Expression Difference	11347613	11349001	1389	1	reverse	6.6	-6.6	-1.05569	2.7076e-07
SPE1 CDS	Expression Difference	6674969	6676369	1401	1	forward	3.9	-3.9	-1.05394	0.000129161
RPS30A CDS	Expression Difference	7957565	7958186	192	2	reverse	4.5	-4.5	-1.05382	2.85996e-05
HMT1 CDS	Expression Difference	535148	536194	1047	1	reverse	3.8	-3.8	-1.05107	0.000152561
MRPS35 CDS	Expression Difference	4568106	4569143	1038	1	forward	10.1	-10.1	-1.0509	8.07053e-11
ALP1 CDS	Expression Difference	9383576	9385297	1722	1	reverse	3.4	-3.4	-1.04969	0.000413354
SOF1 CDS	Expression Difference	7372551	7374020	1470	1	forward	2.5	-2.5	-1.04775	0.0032651
ELP2 CDS	Expression Difference	4638894	4641260	2367	1	reverse	5.5	-5.5	-1.04767	3.22142e-06
SUC2 CDS	Expression Difference	5429958	5431556	1599	1	forward	1.6	-1.6	-1.0464	0.0237351
hypothetical protein CDS	Expression Difference	7509185	7510282	1098	1	forward	3.6	-3.6	-1.04404	0.000275043
gag-pol fusion protein CDS	Expression Difference	7838466	7843734	5268	2	forward	4	-4	-1.04367	9.354e-05
POL12 CDS	Expression Difference	381711	383828	2118	1	reverse	8.2	-8.2	-1.0419	6.48484e-09
NFT1 CDS	Expression Difference	7231292	7234948	3657	1	forward	0	0	-1.04106	NA
RPP1 CDS	Expression Difference	5052807	5053688	882	1	reverse	7	-7	-1.0392	1.04248e-07
ADE1 CDS	Expression Difference	169375	170295	921	1	forward	2.4	-2.4	-1.03674	0.00413431
SPB4 CDS	Expression Difference	3613943	3615763	1821	1	reverse	5	-5	-1.0357	9.99722e-06
ARN1 CDS	Expression Difference	4849018	4850901	1884	1	reverse	0	0	-1.03364	NA
HLR1 CDS	Expression Difference	2854608	2855879	1272	1	forward	2.9	-2.9	-1.03221	0.00118482
NAF1 CDS	Expression Difference	9640528	9642006	1479	1	forward	3.2	-3.2	-1.0317	0.000573962
RFC4 CDS	Expression Difference	10173553	10174524	972	1	reverse	4.2	-4.2	-1.0311	6.60824e-05
IAH1 CDS	Expression Difference	10591930	10592646	717	1	reverse	7.6	-7.6	-1.02976	2.43505e-08
GPN3 CDS	Expression Difference	7869231	7870049	819	1	forward	3.3	-3.3	-1.02954	0.000523921
MKC7 CDS	Expression Difference	2104333	2106123	1791	1	reverse	4.5	-4.5	-1.02769	2.92554e-05
NOP19 CDS	Expression Difference	4734629	4735219	591	1	forward	3	-3	-1.02695	0.000999487
AAD4 CDS	Expression Difference	1377599	1378588	990	1	reverse	2.7	-2.7	-1.02592	0.00182589
RPC11 CDS	Expression Difference	1908000	1908332	333	1	reverse	2.7	-2.7	-1.02531	0.00204247
LYS12 CDS	Expression Difference	5579090	5580205	1116	1	reverse	2.2	-2.2	-1.0253	0.00570715
RNT1 CDS	Expression Difference	9071467	9072882	1416	1	reverse	3.9	-3.9	-1.02496	0.000124974
HTL1 CDS	Expression Difference	1198722	1198958	237	1	forward	5.6	-5.6	-1.02414	2.60965e-06
RPC34 CDS	Expression Difference	9881980	9882933	954	1	reverse	3.1	-3.1	-1.02019	0.000797403
WIP1 CDS	Expression Difference	2584779	2585048	270	1	forward	5.4	-5.4	-1.01836	3.6853e-06
PEX4 CDS	Expression Difference	4495886	4496437	552	1	forward	4.6	-4.6	-1.0177	2.46251e-05
KAR4 CDS	Expression Difference	1071331	1072338	1008	1	forward	7.5	-7.5	-1.01758	3.31233e-08
SOR2 CDS	Expression Difference	1368705	1369778	1074	1	reverse	2.4	-2.4	-1.01731	0.00426052
MAS2 CDS	Expression Difference	4987674	4989122	1449	1	reverse	8	-8	-1.01721	9.30713e-09
MRPL7 CDS	Expression Difference	2296637	2297515	879	1	forward	7.2	-7.2	-1.01703	5.88486e-08
HEM12 CDS	Expression Difference	1911882	1912970	1089	1	forward	4.9	-4.9	-1.01607	1.13886e-05
LHP1 CDS	Expression Difference	1723974	1724801	828	1	forward	3.3	-3.3	-1.01518	0.00049559
EFG1 CDS	Expression Difference	4776790	4777491	702	1	reverse	2.8	-2.8	-1.01512	0.00143563
NAT4 CDS	Expression Difference	8730914	8731771	858	1	forward	2.7	-2.7	-1.01505	0.00177897
SOR1 CDS	Expression Difference	6568505	6569578	1074	1	forward	2.3	-2.3	-1.01345	0.00518084
SDS23 CDS	Expression Difference	4135025	4136608	1584	1	reverse	2.4	-2.4	-1.01327	0.00378349
ARG80 CDS	Expression Difference	8675808	8676341	534	1	forward	4.5	-4.5	-1.00874	3.02839e-05
hypothetical protein CDS	Expression Difference	319676	319774	99	1	reverse	1.3	-1.3	-1.00576	0.0454861
HCH1 CDS	Expression Difference	9356103	9356564	462	1	forward	2.5	-2.5	-1.00332	0.00304109
SLX9 CDS	Expression Difference	4382138	4382770	633	1	reverse	3.2	-3.2	-1.00136	0.000699997
SEC39 CDS	Expression Difference	8260596	8262725	2130	1	reverse	9.1	-9.1	-0.998906	7.54052e-10
BOP2 CDS	Expression Difference	7923240	7924952	1713	1	forward	2.4	-2.4	-0.998669	0.0036188
hypothetical protein CDS	Expression Difference	5854434	5855024	591	1	forward	2.6	-2.6	-0.996327	0.00261417
SDT1 CDS	Expression Difference	3817005	3817847	843	1	reverse	2.3	-2.3	-0.996134	0.00463159
hypothetical protein CDS	Expression Difference	8586688	8587560	873	1	forward	3.1	-3.1	-0.994561	0.000710352
RPS7B CDS	Expression Difference	9691034	9691951	573	2	reverse	6.2	-6.2	-0.994099	6.07812e-07
NUG1 CDS	Expression Difference	3054678	3056240	1563	1	forward	2.7	-2.7	-0.990495	0.00187923
gag-pol fusion protein CDS	Expression Difference	4301189	4306457	5268	2	reverse	3.3	-3.3	-0.990423	0.000495123
YIH1 CDS	Expression Difference	1266856	1267632	777	1	reverse	4.1	-4.1	-0.990373	7.41838e-05
RIO2 CDS	Expression Difference	9502989	9504266	1278	1	forward	3.4	-3.4	-0.986197	0.000375652
IPI1 CDS	Expression Difference	5106694	5107698	1005	1	forward	4.2	-4.2	-0.98608	6.38598e-05
DPH2 CDS	Expression Difference	6659247	6660851	1605	1	forward	3.5	-3.5	-0.98477	0.000298954
GAR1 CDS	Expression Difference	5112611	5113228	618	1	reverse	2.2	-2.2	-0.984746	0.00621232
TRI1 CDS	Expression Difference	9062390	9063070	681	1	forward	3.8	-3.8	-0.984228	0.000169658
TPC1 CDS	Expression Difference	4415611	4416555	945	1	forward	6.2	-6.2	-0.982491	6.28499e-07
RSM26 CDS	Expression Difference	6450695	6451495	801	1	forward	9.2	-9.2	-0.981549	6.36461e-10
gag-pol fusion protein CDS	Expression Difference	5373894	5379276	5382	2	reverse	3.4	-3.4	-0.981019	0.000365603
LOT5 CDS	Expression Difference	6676933	6677853	921	1	forward	4.4	-4.4	-0.979651	4.34024e-05
hypothetical protein CDS	Expression Difference	6971358	6971585	228	1	reverse	5.2	-5.2	-0.978362	6.71187e-06
RRT6 CDS	Expression Difference	3967741	3968676	936	1	reverse	2.2	-2.2	-0.977827	0.00630585
MRPL49 CDS	Expression Difference	6078951	6079436	486	1	forward	9.1	-9.1	-0.976714	8.05223e-10
RPG1 CDS	Expression Difference	625601	628495	2895	1	reverse	5.1	-5.1	-0.976659	8.20526e-06
BNA2 CDS	Expression Difference	6411321	6412682	1362	1	forward	2	-2	-0.976067	0.00893988
GPM1 CDS	Expression Difference	6741854	6742597	744	1	reverse	3.3	-3.3	-0.973117	0.000547814
gag-pol fusion protein CDS	Expression Difference	11928261	11933529	5268	2	reverse	3.3	-3.3	-0.972357	0.000525359
ERG2 CDS	Expression Difference	8990742	8991410	669	1	forward	4.7	-4.7	-0.971511	2.06356e-05
CBP2 CDS	Expression Difference	4853547	4855439	1893	1	reverse	8.4	-8.4	-0.970206	4.44762e-09
PDR8 CDS	Expression Difference	7920647	7922752	2106	1	reverse	4.6	-4.6	-0.96869	2.5453e-05
hypothetical protein CDS	Expression Difference	9839063	9840535	1473	1	reverse	6.5	-6.5	-0.967474	3.51395e-07
SRB8 CDS	Expression Difference	1297773	1302056	4284	1	forward	3.6	-3.6	-0.966329	0.000248936
TRM10 CDS	Expression Difference	10174784	10175665	882	1	forward	3.3	-3.3	-0.965601	0.000548447
UTP23 CDS	Expression Difference	10365561	10366325	765	1	forward	2.2	-2.2	-0.964523	0.00574953
SOV1 CDS	Expression Difference	8724746	8727442	2697	1	forward	4.4	-4.4	-0.963151	4.37422e-05
RTG3 CDS	Expression Difference	252294	253754	1461	1	reverse	5.7	-5.7	-0.961631	2.15569e-06
SAE2 CDS	Expression Difference	3912275	3913312	1038	1	reverse	2.2	-2.2	-0.957796	0.00686365
SAE3 CDS	Expression Difference	5092122	5092483	276	2	reverse	1.6	-1.6	-0.956516	0.0245756
MTR4 CDS	Expression Difference	6174983	6178204	3222	1	forward	2.5	-2.5	-0.955137	0.00332884
BSC4 CDS	Expression Difference	9385335	9385730	396	1	forward	1.1	-1.1	-0.954712	0.0776269
THI3 CDS	Expression Difference	1670664	1672493	1830	1	reverse	5.4	-5.4	-0.953228	4.01256e-06
TIF4631 CDS	Expression Difference	4563049	4565907	2859	1	forward	4.2	-4.2	-0.952243	6.41446e-05
hypothetical protein CDS	Expression Difference	9834743	9835483	741	1	reverse	3.4	-3.4	-0.95215	0.000419424
AAD15 CDS	Expression Difference	10033616	10034047	432	1	reverse	2.8	-2.8	-0.952124	0.00160453
ICY1 CDS	Expression Difference	8977239	8977622	384	1	forward	6.3	-6.3	-0.952084	5.48957e-07
RAI1 CDS	Expression Difference	3776607	3777770	1164	1	reverse	6.8	-6.8	-0.947667	1.53065e-07
GEM1 CDS	Expression Difference	52801	54789	1989	1	reverse	5.9	-5.9	-0.946379	1.40714e-06
HES1 CDS	Expression Difference	10813963	10815267	1305	1	forward	1.3	-1.3	-0.944736	0.0560254
BCD1 CDS	Expression Difference	5017854	5018954	1101	1	forward	2.4	-2.4	-0.941788	0.0042094
TEF4 CDS	Expression Difference	6861103	6862667	1239	2	forward	3.5	-3.5	-0.941413	0.000314526
hypothetical protein CDS	Expression Difference	11769210	11769413	204	1	forward	2	-2	-0.941327	0.00953781
DUT1 CDS	Expression Difference	952829	953272	444	1	forward	3.3	-3.3	-0.940786	0.000525896
MRPL6 CDS	Expression Difference	5222569	5223213	645	1	reverse	7.5	-7.5	-0.938635	3.27292e-08
PRS1 CDS	Expression Difference	6685528	6686811	1284	1	forward	3.2	-3.2	-0.938436	0.000689791
RIM2 CDS	Expression Difference	837870	839003	1134	1	forward	9.4	-9.4	-0.937954	3.61414e-10
THI80 CDS	Expression Difference	10633352	10634311	960	1	reverse	3.1	-3.1	-0.936163	0.000760596
TRM8 CDS	Expression Difference	1459583	1460443	861	1	forward	4.3	-4.3	-0.936082	5.28095e-05
DBP10 CDS	Expression Difference	1754239	1757226	2988	1	forward	3.4	-3.4	-0.933231	0.000377904
MCH1 CDS	Expression Difference	1719847	1721307	1461	1	reverse	3.2	-3.2	-0.933079	0.000616479
Y' element ATP-dependent helicase CDS	Expression Difference	3470266	3471444	1179	1	reverse	1.7	-1.7	-0.930111	0.0189435
hypothetical protein CDS	Expression Difference	2896140	2897069	651	2	reverse	1.4	-1.4	-0.92997	0.038096
ART10 CDS	Expression Difference	8149777	8151333	1557	1	reverse	2.1	-2.1	-0.927943	0.00752266
SGF29 CDS	Expression Difference	1146973	1147752	780	1	reverse	3.9	-3.9	-0.926973	0.00012956
UTP25 CDS	Expression Difference	5583603	5585768	2166	1	reverse	3.8	-3.8	-0.926305	0.000148898
HCR1 CDS	Expression Difference	7783820	7784617	798	1	reverse	7.9	-7.9	-0.925756	1.21939e-08
KRR1 CDS	Expression Difference	1065831	1066781	951	1	reverse	1.7	-1.7	-0.924266	0.0206969
NUP100 CDS	Expression Difference	6888411	6891290	2880	1	forward	5.6	-5.6	-0.923323	2.71457e-06
PRS3 CDS	Expression Difference	4910584	4911546	963	1	reverse	3.8	-3.8	-0.922497	0.000151878
RPA34 CDS	Expression Difference	5972898	5973599	702	1	forward	3.5	-3.5	-0.918722	0.000337304
MED2 CDS	Expression Difference	1801036	1802331	1296	1	reverse	3.5	-3.5	-0.917584	0.00033388
IBA57 CDS	Expression Difference	6482237	6483730	1494	1	forward	5	-5	-0.915743	1.04549e-05
NMD5 CDS	Expression Difference	6501983	6505129	3147	1	forward	4.5	-4.5	-0.912516	2.95851e-05
CDC9 CDS	Expression Difference	1525009	1527276	2268	1	reverse	3.7	-3.7	-0.912457	0.000204584
BUD22 CDS	Expression Difference	8622073	8623632	1560	1	forward	2.2	-2.2	-0.91061	0.0070474
LYS5 CDS	Expression Difference	3954268	3955086	819	1	reverse	4.8	-4.8	-0.909908	1.44642e-05
hypothetical protein CDS	Expression Difference	1501231	1501743	513	1	reverse	5.2	-5.2	-0.909567	6.23472e-06
SNP1 CDS	Expression Difference	5637230	5638132	903	1	reverse	4.2	-4.2	-0.906477	6.65224e-05
gag-pol fusion protein CDS	Expression Difference	2347556	2352371	4815	2	reverse	3.2	-3.2	-0.906054	0.000575927
TRM44 CDS	Expression Difference	11616803	11618506	1704	1	forward	4.7	-4.7	-0.905883	1.98786e-05
hypothetical protein CDS	Expression Difference	2577804	2579132	1329	1	reverse	4.1	-4.1	-0.905047	7.52093e-05
SWD3 CDS	Expression Difference	812626	813573	948	1	forward	3	-3	-0.904551	0.000911926
TRM732 CDS	Expression Difference	9107826	9112088	4263	1	reverse	4.6	-4.6	-0.903494	2.52609e-05
COS12 CDS	Expression Difference	3741780	3742922	1143	1	forward	3	-3	-0.903471	0.000895824
RRP46 CDS	Expression Difference	4414661	4415332	672	1	reverse	3.1	-3.1	-0.90285	0.000725386
hypothetical protein CDS	Expression Difference	6031139	6035786	4647	2	forward	2.7	-2.7	-0.902333	0.00201399
UPS1 CDS	Expression Difference	7785037	7785564	528	1	reverse	3.2	-3.2	-0.899722	0.000577951
NAG1 CDS	Expression Difference	4285799	4286290	492	1	reverse	4.9	-4.9	-0.898827	1.28492e-05
GRX4 CDS	Expression Difference	3430389	3431123	735	1	reverse	3.5	-3.5	-0.898572	0.000344856
gag-pol fusion protein CDS	Expression Difference	8519833	8525101	5268	2	forward	2.8	-2.8	-0.898185	0.00167915
RRP1 CDS	Expression Difference	1977492	1978328	837	1	reverse	2.6	-2.6	-0.894787	0.00275947
SPT10 CDS	Expression Difference	6014759	6016681	1923	1	reverse	3.7	-3.7	-0.894768	0.000216471
NUT2 CDS	Expression Difference	12001336	12001809	474	1	forward	2.6	-2.6	-0.893547	0.00273522
GLN3 CDS	Expression Difference	3121750	3123942	2193	1	forward	4.7	-4.7	-0.89343	2.13545e-05
RIM9 CDS	Expression Difference	8720282	8721001	720	1	forward	3.1	-3.1	-0.89317	0.000719533
MTG1 CDS	Expression Difference	8782629	8783732	1104	1	reverse	3.1	-3.1	-0.892878	0.000713804
gag-pol fusion protein CDS	Expression Difference	7721361	7726629	5268	2	reverse	2.7	-2.7	-0.889449	0.00189874
NOP58 CDS	Expression Difference	10928794	10930329	1536	1	reverse	2.6	-2.6	-0.888814	0.00280099
GCV1 CDS	Expression Difference	1844185	1845387	1203	1	reverse	2.1	-2.1	-0.885163	0.00840302
BUD31 CDS	Expression Difference	1271720	1272193	474	1	forward	2.7	-2.7	-0.885033	0.00203476
FRD1 CDS	Expression Difference	2957340	2958752	1413	1	reverse	4	-4	-0.884704	9.03639e-05
ARG5,6 CDS	Expression Difference	3187365	3189956	2592	1	forward	2.9	-2.9	-0.880093	0.00117007
NQM1 CDS	Expression Difference	4319425	4320426	1002	1	reverse	1.4	-1.4	-0.877338	0.0394411
CRF1 CDS	Expression Difference	2272121	2273524	1404	1	forward	2.1	-2.1	-0.87705	0.00810094
MSH1 CDS	Expression Difference	5179504	5182383	2880	1	forward	4	-4	-0.876226	0.000107503
putative asparagine synthase CDS	Expression Difference	8403114	8404691	1578	1	forward	3.9	-3.9	-0.87622	0.000135214
TRP4 CDS	Expression Difference	2544769	2545911	1143	1	forward	3.7	-3.7	-0.87402	0.000185464
RRT15 CDS	Expression Difference	7735434	7735622	189	1	forward	2.2	-2.2	-0.873235	0.00619383
SSZ1 CDS	Expression Difference	5055455	5057071	1617	1	reverse	3.6	-3.6	-0.872597	0.0002247
FMP30 CDS	Expression Difference	11481260	11482666	1407	1	reverse	8.2	-8.2	-0.872533	6.48339e-09
CCC2 CDS	Expression Difference	2365697	2368711	3015	1	forward	1.4	-1.4	-0.870445	0.0432807
MRPL3 CDS	Expression Difference	8645080	8646252	1173	1	forward	5.7	-5.7	-0.868801	2.03439e-06
ORC5 CDS	Expression Difference	9402736	9404175	1440	1	forward	4.5	-4.5	-0.868518	3.08901e-05
DBF20 CDS	Expression Difference	11870566	11872260	1695	1	forward	2.9	-2.9	-0.868147	0.00114894
RRP40 CDS	Expression Difference	10087527	10088249	723	1	forward	4.1	-4.1	-0.866349	7.61063e-05
hypothetical protein CDS	Expression Difference	11848102	11848404	303	1	reverse	0.7	-0.7	-0.865395	0.209006
RPS9A CDS	Expression Difference	11528210	11529304	594	2	forward	3.2	-3.2	-0.86483	0.000666073
PRP11 CDS	Expression Difference	1735702	1736502	801	1	reverse	4.3	-4.3	-0.862423	4.69404e-05
SFT2 CDS	Expression Difference	254316	254963	648	1	forward	3.4	-3.4	-0.861153	0.000418907
DPB2 CDS	Expression Difference	12012234	12014303	2070	1	forward	4.7	-4.7	-0.860387	2.14639e-05
KAP122 CDS	Expression Difference	4200656	4203901	3246	1	forward	3.6	-3.6	-0.858177	0.000258142
DBP7 CDS	Expression Difference	7063356	7065584	2229	1	reverse	1.8	-1.8	-0.854335	0.0145646
VHT1 CDS	Expression Difference	4357067	4358848	1782	1	reverse	6.5	-6.5	-0.852174	2.91957e-07
ICL2 CDS	Expression Difference	11690529	11692256	1728	1	reverse	1.6	-1.6	-0.851365	0.0276336
RAD53 CDS	Expression Difference	11384987	11387452	2466	1	reverse	2.6	-2.6	-0.851283	0.00259997
BIO3 CDS	Expression Difference	9981927	9983369	1443	1	forward	5	-5	-0.84468	9.36292e-06
SPO23 CDS	Expression Difference	949251	950822	1572	1	forward	1.9	-1.9	-0.840688	0.012488
STB4 CDS	Expression Difference	8635361	8638210	2850	1	forward	4	-4	-0.838884	0.000103933
hypothetical protein CDS	Expression Difference	6280938	6281219	282	1	reverse	0	0	-0.837651	NA
hypothetical protein CDS	Expression Difference	3489676	3491616	1941	1	reverse	1.4	-1.4	-0.83728	0.0397218
TIF5 CDS	Expression Difference	11771964	11773181	1218	1	forward	3.8	-3.8	-0.836568	0.000161829
MAK11 CDS	Expression Difference	6975556	6976962	1407	1	reverse	2.7	-2.7	-0.835488	0.0019033
TRM3 CDS	Expression Difference	1618937	1623247	4311	1	forward	2.2	-2.2	-0.835387	0.00655004
TOD6 CDS	Expression Difference	347807	349384	1578	1	forward	1.8	-1.8	-0.835127	0.0151901
SNX41 CDS	Expression Difference	2680086	2681963	1878	1	forward	2.4	-2.4	-0.833635	0.0037267
MAL32 CDS	Expression Difference	1035569	1037323	1755	1	forward	1.1	-1.1	-0.832936	0.078725
THS1 CDS	Expression Difference	5605072	5607276	2205	1	forward	1.9	-1.9	-0.831772	0.0139222
YAP7 CDS	Expression Difference	10302602	10303339	738	1	reverse	1.8	-1.8	-0.831685	0.0161299
LTV1 CDS	Expression Difference	6754993	6756384	1392	1	forward	1.6	-1.6	-0.831452	0.0253608
gag-pol fusion protein CDS	Expression Difference	3335711	3340979	5268	2	reverse	2.4	-2.4	-0.829247	0.00393694
hypothetical protein CDS	Expression Difference	12011303	12011968	666	1	reverse	4.2	-4.2	-0.827486	5.74831e-05
CTP1 CDS	Expression Difference	1013891	1014790	900	1	reverse	2	-2	-0.827465	0.0099132
TRM82 CDS	Expression Difference	2144893	2146227	1335	1	forward	2.7	-2.7	-0.82659	0.00221915
APN1 CDS	Expression Difference	6801564	6802667	1104	1	reverse	3.1	-3.1	-0.826143	0.000809061
FAL1 CDS	Expression Difference	1846826	1848025	1200	1	forward	2.5	-2.5	-0.825918	0.00308172
RRP14 CDS	Expression Difference	6859237	6860541	1305	1	reverse	2.5	-2.5	-0.825855	0.00299941
hypothetical protein CDS	Expression Difference	1881336	1881491	156	1	forward	1.5	-1.5	-0.825259	0.029948
SKI6 CDS	Expression Difference	4627872	4628612	741	1	forward	4.5	-4.5	-0.822941	3.53761e-05
hypothetical protein CDS	Expression Difference	7734601	7734957	357	1	forward	1.3	-1.3	-0.822884	0.0449988
hypothetical protein CDS	Expression Difference	7707550	7707699	150	1	reverse	1.8	-1.8	-0.822769	0.0148764
PTH1 CDS	Expression Difference	5313958	5314530	573	1	forward	2	-2	-0.822763	0.0109776
gag-pol fusion protein CDS	Expression Difference	10149969	10155237	5268	2	forward	2.5	-2.5	-0.822148	0.00307787
ADE2 CDS	Expression Difference	10596445	10598160	1716	1	reverse	2.6	-2.6	-0.821567	0.00274141
YTM1 CDS	Expression Difference	10864782	10866164	1383	1	forward	1.9	-1.9	-0.820136	0.0137807
ILV2 CDS	Expression Difference	8807289	8809352	2064	1	forward	2.2	-2.2	-0.819737	0.0069877
HGH1 CDS	Expression Difference	4609222	4610406	1185	1	reverse	3.8	-3.8	-0.819618	0.00016509
CMS1 CDS	Expression Difference	7401883	7402758	876	1	reverse	2.2	-2.2	-0.818428	0.00578545
CBT1 CDS	Expression Difference	6625369	6626184	816	1	forward	4.2	-4.2	-0.818115	6.17513e-05
MRPL9 CDS	Expression Difference	4675064	4675873	810	1	reverse	6.5	-6.5	-0.816942	3.2268e-07
ADH7 CDS	Expression Difference	1352472	1353557	1086	1	forward	1.3	-1.3	-0.815458	0.0476393
REX4 CDS	Expression Difference	10212527	10213396	870	1	reverse	2.8	-2.8	-0.815097	0.00162895
RAD5 CDS	Expression Difference	7450019	7453528	3510	1	forward	4.6	-4.6	-0.814101	2.80744e-05
RLF2 CDS	Expression Difference	11717736	11719556	1821	1	forward	3.5	-3.5	-0.814026	0.000323195
GEA2 CDS	Expression Difference	3003376	3007755	4380	1	forward	3.5	-3.5	-0.812872	0.000337906
ZRT1 CDS	Expression Difference	3759968	3761098	1131	1	forward	1.9	-1.9	-0.812203	0.0118166
DRS2 CDS	Expression Difference	95630	99697	4068	1	reverse	2.3	-2.3	-0.812056	0.00525122
YOX1 CDS	Expression Difference	8544611	8545768	1158	1	forward	1.6	-1.6	-0.811562	0.0225255
gag-pol fusion protein CDS	Expression Difference	2005880	2011148	5268	2	reverse	2.8	-2.8	-0.811214	0.00173916
RLP7 CDS	Expression Difference	9873810	9874778	969	1	reverse	2.4	-2.4	-0.810941	0.00429791
carbonyl reductase (NADPH-dependent) CDS	Expression Difference	4162951	4163997	1047	1	forward	3.8	-3.8	-0.810157	0.000150807
FRE1 CDS	Expression Difference	7813595	7815655	2061	1	forward	1.8	-1.8	-0.80972	0.0154314
hypothetical protein CDS	Expression Difference	893213	894895	1683	1	reverse	4.2	-4.2	-0.808895	6.28294e-05
PBP4 CDS	Expression Difference	1721721	1722278	558	1	reverse	4.1	-4.1	-0.808592	7.61911e-05
MRS1 CDS	Expression Difference	5789867	5790958	1092	1	forward	5	-5	-0.807863	1.04022e-05
MNS1 CDS	Expression Difference	6500105	6501754	1650	1	forward	5.3	-5.3	-0.807478	5.41658e-06
IMO32 CDS	Expression Difference	4285431	4286459	1029	1	forward	5.3	-5.3	-0.807473	4.61378e-06
hypothetical protein CDS	Expression Difference	397736	398056	321	1	reverse	2	-2	-0.807057	0.00986115
MAL12 CDS	Expression Difference	4815589	4817343	1755	1	forward	1.1	-1.1	-0.80483	0.085828
YAR1 CDS	Expression Difference	11222744	11223346	603	1	forward	2.4	-2.4	-0.80468	0.00385923
SGD1 CDS	Expression Difference	8044725	8047424	2700	1	reverse	3.4	-3.4	-0.804431	0.000433417
gag-pol fusion protein CDS	Expression Difference	4550728	4556041	5313	2	forward	2.8	-2.8	-0.803284	0.00143594
FYV7 CDS	Expression Difference	7516036	7516491	456	1	forward	1.8	-1.8	-0.80305	0.0161157
hypothetical protein CDS	Expression Difference	5380578	5380871	294	1	reverse	0.7	-0.7	-0.801373	0.184265
ERG10 CDS	Expression Difference	11621356	11622552	1197	1	forward	3.6	-3.6	-0.801103	0.000273701
MNP1 CDS	Expression Difference	4114077	4114661	585	1	forward	4.2	-4.2	-0.80054	5.76612e-05
POC4 CDS	Expression Difference	11403740	11404186	447	1	forward	2.2	-2.2	-0.798574	0.00633476
MIF2 CDS	Expression Difference	6851606	6853255	1650	1	forward	2.5	-2.5	-0.795392	0.00350303
EFT2 CDS	Expression Difference	2603252	2605780	2529	1	forward	2.9	-2.9	-0.79534	0.00126109
hypothetical protein CDS	Expression Difference	6581715	6583832	2118	1	reverse	5.5	-5.5	-0.793902	3.00033e-06
DYS1 CDS	Expression Difference	5062063	5063226	1164	1	forward	2.6	-2.6	-0.793838	0.00227979
gag-pol fusion protein CDS	Expression Difference	1128504	1133817	5313	2	forward	2.5	-2.5	-0.791281	0.00324525
SHE3 CDS	Expression Difference	725810	727087	1278	1	reverse	5.1	-5.1	-0.790909	7.30181e-06
hypothetical protein CDS	Expression Difference	5880120	5882396	2277	1	reverse	2.5	-2.5	-0.790776	0.00349919
hypothetical protein CDS	Expression Difference	3333328	3333774	447	1	reverse	1.8	-1.8	-0.78949	0.0176592
MAK10 CDS	Expression Difference	2945856	2948057	2202	1	reverse	4.8	-4.8	-0.789014	1.57269e-05
RPO26 CDS	Expression Difference	12034517	12035060	468	2	forward	2.6	-2.6	-0.788662	0.00258053
GCD1 CDS	Expression Difference	10845953	10847689	1737	1	forward	3.3	-3.3	-0.788563	0.000458606
hypothetical protein CDS	Expression Difference	4904629	4904712	84	1	forward	0.8	-0.8	-0.787577	0.176378
hypothetical protein CDS	Expression Difference	2179455	2180846	1392	1	forward	2.4	-2.4	-0.786497	0.00407741
gag-pol fusion protein CDS	Expression Difference	11180008	11185276	5268	2	forward	2.2	-2.2	-0.786077	0.00586079
EFT1 CDS	Expression Difference	10607067	10609595	2529	1	forward	2.9	-2.9	-0.785319	0.00122308
HSP10 CDS	Expression Difference	10402493	10402813	321	1	reverse	2.7	-2.7	-0.784796	0.00212642
YKE4 CDS	Expression Difference	5701959	5702999	1041	1	reverse	2.9	-2.9	-0.784662	0.00122079
hypothetical protein CDS	Expression Difference	11077165	11077320	156	1	forward	1.7	-1.7	-0.784072	0.017899
SMF3 CDS	Expression Difference	7455540	7456961	1422	1	reverse	1.8	-1.8	-0.783894	0.0155393
CRC1 CDS	Expression Difference	10545264	10546247	984	1	reverse	1.4	-1.4	-0.783591	0.0412987
hypothetical protein CDS	Expression Difference	8199287	8199625	339	1	reverse	0.8	-0.8	-0.78314	0.146345
gag-pol fusion protein CDS	Expression Difference	3607033	3612346	5313	2	forward	2.7	-2.7	-0.782429	0.00214627
SWD1 CDS	Expression Difference	155005	156285	1281	1	forward	3.2	-3.2	-0.781504	0.000602748
FOL2 CDS	Expression Difference	4763994	4764725	732	1	reverse	2.9	-2.9	-0.78136	0.0011938
AAT2 CDS	Expression Difference	7441857	7443113	1257	1	reverse	2.8	-2.8	-0.779839	0.00162877
hypothetical protein CDS	Expression Difference	9645659	9646006	348	1	reverse	4.7	-4.7	-0.779751	2.13104e-05
gag protein CDS	Expression Difference	2163217	2164539	1323	1	forward	1.9	-1.9	-0.778506	0.0116731
hypothetical protein CDS	Expression Difference	10899967	10900116	150	1	reverse	1.4	-1.4	-0.777876	0.0411234
THP2 CDS	Expression Difference	5269272	5270057	786	1	forward	2.3	-2.3	-0.777275	0.00531121
PRP19 CDS	Expression Difference	7311773	7313284	1512	1	reverse	2.8	-2.8	-0.77673	0.00162397
MIC23 CDS	Expression Difference	240179	240769	591	1	reverse	3.8	-3.8	-0.776539	0.000153275
CLB5 CDS	Expression Difference	11897135	11898442	1308	1	reverse	1.8	-1.8	-0.77319	0.0162665
RPC19 CDS	Expression Difference	9660407	9660835	429	1	forward	1.9	-1.9	-0.772944	0.0138992
MPP6 CDS	Expression Difference	9920045	9920605	561	1	forward	2.4	-2.4	-0.772025	0.00419797
ZUO1 CDS	Expression Difference	4800842	4802143	1302	1	reverse	4.7	-4.7	-0.771231	1.98156e-05
POL5 CDS	Expression Difference	2940426	2943494	3069	1	reverse	2.6	-2.6	-0.771166	0.00262306
CHO1 CDS	Expression Difference	3099599	3100429	831	1	reverse	1.7	-1.7	-0.770134	0.0212898
hypothetical protein CDS	Expression Difference	5992084	5992308	225	1	reverse	1.3	-1.3	-0.76978	0.0545064
ARE1 CDS	Expression Difference	1255331	1257163	1833	1	forward	2.2	-2.2	-0.76905	0.0066582
VAM10 CDS	Expression Difference	10485838	10486182	345	1	reverse	1.6	-1.6	-0.767105	0.022987
HPR1 CDS	Expression Difference	2090600	2092858	2259	1	forward	4.2	-4.2	-0.766387	5.95303e-05
hypothetical protein CDS	Expression Difference	7962173	7963006	834	1	reverse	2.2	-2.2	-0.765964	0.0059797
RPB8 CDS	Expression Difference	10792794	10793234	441	1	reverse	4	-4	-0.76491	0.000106818
ANR2 CDS	Expression Difference	6927675	6929225	1551	1	forward	5.5	-5.5	-0.764755	3.04642e-06
CST9 CDS	Expression Difference	8152978	8154426	1449	1	forward	2	-2	-0.764081	0.00971105
RSM19 CDS	Expression Difference	9942688	9942963	276	1	reverse	3.7	-3.7	-0.763493	0.000199534
RTG1 CDS	Expression Difference	10233954	10234487	534	1	reverse	2.6	-2.6	-0.76102	0.0023239
NAR1 CDS	Expression Difference	9446138	9447613	1476	1	reverse	2.7	-2.7	-0.75932	0.00205126
YPK3 CDS	Expression Difference	524643	526220	1578	1	reverse	3.4	-3.4	-0.758852	0.000376366
TPN1 CDS	Expression Difference	3890027	3891766	1740	1	reverse	1.5	-1.5	-0.758829	0.0288496
JJJ2 CDS	Expression Difference	5946339	5948090	1752	1	reverse	3.4	-3.4	-0.758629	0.000394215
IRC22 CDS	Expression Difference	3042256	3042933	678	1	reverse	2.6	-2.6	-0.758506	0.00280654
CIC1 CDS	Expression Difference	5040778	5041908	1131	1	forward	2	-2	-0.757789	0.00896976
hypothetical protein CDS	Expression Difference	9924835	9926124	1290	1	reverse	5.4	-5.4	-0.757267	4.29447e-06
gag-pol fusion protein CDS	Expression Difference	2567019	2572287	5268	2	forward	2.1	-2.1	-0.756722	0.00773911
ARD1 CDS	Expression Difference	4960660	4961376	717	1	reverse	3.1	-3.1	-0.755988	0.000761092
SUP45 CDS	Expression Difference	761087	762400	1314	1	reverse	2.1	-2.1	-0.754516	0.00775662
POM34 CDS	Expression Difference	7423735	7424634	900	1	reverse	2.9	-2.9	-0.753617	0.00115454
POL32 CDS	Expression Difference	6348922	6349974	1053	1	reverse	3.5	-3.5	-0.753453	0.000323319
RPB9 CDS	Expression Difference	4113449	4113817	369	1	reverse	2.8	-2.8	-0.753275	0.00166156
PHA2 CDS	Expression Difference	9289707	9290711	1005	1	reverse	3.3	-3.3	-0.752556	0.000529544
GIM3 CDS	Expression Difference	9593305	9593694	390	1	reverse	2.6	-2.6	-0.752401	0.00234705
KIN28 CDS	Expression Difference	1627720	1628721	921	2	forward	3.4	-3.4	-0.75234	0.000396693
FRS1 CDS	Expression Difference	7506007	7507794	1788	1	forward	4.8	-4.8	-0.752171	1.68231e-05
RAD3 CDS	Expression Difference	3419037	3421373	2337	1	forward	4.1	-4.1	-0.751997	8.03348e-05
ADE6 CDS	Expression Difference	4350879	4354955	4077	1	reverse	2.1	-2.1	-0.75152	0.0071492
ERD1 CDS	Expression Difference	2655620	2656708	1089	1	reverse	2.6	-2.6	-0.751494	0.0027499
HTS1 CDS	Expression Difference	11760639	11762279	1641	1	reverse	2.3	-2.3	-0.751483	0.00545001
RRP36 CDS	Expression Difference	10882906	10883808	903	1	reverse	2.2	-2.2	-0.751248	0.00672601
YCK2 CDS	Expression Difference	9591272	9592912	1641	1	reverse	4.3	-4.3	-0.751034	5.33183e-05
SIR1 CDS	Expression Difference	7218752	7220716	1965	1	forward	3	-3	-0.750594	0.000923958
MEU1 CDS	Expression Difference	7422636	7423649	1014	1	forward	3.2	-3.2	-0.749414	0.000630334
MRPL8 CDS	Expression Difference	6148220	6148936	717	1	reverse	4.8	-4.8	-0.747978	1.62369e-05
RLI1 CDS	Expression Difference	1986730	1988556	1827	1	reverse	3	-3	-0.746662	0.00104812
MSL1 CDS	Expression Difference	5767098	5767433	336	1	forward	2.8	-2.8	-0.7458	0.00150907
RBA50 CDS	Expression Difference	2851116	2852435	1320	1	forward	2.7	-2.7	-0.744624	0.00205953
GIS3 CDS	Expression Difference	7572758	7574266	1509	1	reverse	1.7	-1.7	-0.742409	0.0221319
POL1 CDS	Expression Difference	9677723	9682129	4407	1	forward	2.4	-2.4	-0.742382	0.00410981
hypothetical protein CDS	Expression Difference	6479587	6479937	351	1	forward	1.4	-1.4	-0.740798	0.0391009
hypothetical protein CDS	Expression Difference	2896419	2897069	651	1	reverse	0.9	-0.9	-0.740163	0.12711
LEU2 CDS	Expression Difference	1134726	1135820	1095	1	forward	3.8	-3.8	-0.740056	0.00016589
hypothetical protein CDS	Expression Difference	10286895	10286990	96	1	reverse	1.1	-1.1	-0.739955	0.0731016
RPO31 CDS	Expression Difference	10571732	10576114	4383	1	reverse	4.2	-4.2	-0.738832	6.21638e-05
VPS41 CDS	Expression Difference	1964030	1967008	2979	1	forward	1.7	-1.7	-0.738567	0.0188207
MSR1 CDS	Expression Difference	5114769	5116700	1932	1	reverse	2.5	-2.5	-0.738495	0.0028337
hypothetical protein CDS	Expression Difference	10569539	10570423	885	1	forward	2.6	-2.6	-0.737983	0.00230524
LSM5 CDS	Expression Difference	3354540	3354821	282	1	forward	3.6	-3.6	-0.737942	0.000232855
RNR1 CDS	Expression Difference	3190905	3193571	2667	1	forward	1.8	-1.8	-0.736992	0.0159764
hypothetical protein CDS	Expression Difference	6528367	6529410	1044	1	forward	3.5	-3.5	-0.736906	0.000310961
SET2 CDS	Expression Difference	5934688	5936889	2202	1	reverse	4.2	-4.2	-0.736866	6.21346e-05
XYL2 CDS	Expression Difference	7519169	7520239	1071	1	reverse	1.1	-1.1	-0.735246	0.084731
ERG20 CDS	Expression Difference	5937475	5938533	1059	1	forward	3.6	-3.6	-0.735091	0.000273361
PGU1 CDS	Expression Difference	6555276	6556361	1086	1	forward	1.5	-1.5	-0.734645	0.0333017
hypothetical protein CDS	Expression Difference	9692548	9694476	1929	1	reverse	5.2	-5.2	-0.734255	6.33125e-06
MRPL15 CDS	Expression Difference	8004508	8005269	762	1	forward	3.8	-3.8	-0.732763	0.000159156
hypothetical protein CDS	Expression Difference	5387944	5389854	1812	2	forward	1	-1	-0.731988	0.0996899
TSR1 CDS	Expression Difference	1701641	1704007	2367	1	forward	2.3	-2.3	-0.731329	0.00546516
SNU56 CDS	Expression Difference	2303696	2305174	1479	1	reverse	3.1	-3.1	-0.728939	0.00081844
MSY1 CDS	Expression Difference	11488212	11489690	1479	1	forward	3.9	-3.9	-0.727159	0.000118272
MRPS8 CDS	Expression Difference	8895453	8895920	468	1	forward	3.6	-3.6	-0.727076	0.000244151
GCN3 CDS	Expression Difference	7066950	7067867	918	1	reverse	2.9	-2.9	-0.726043	0.00128356
GON7 CDS	Expression Difference	5915909	5916280	372	1	forward	1.8	-1.8	-0.723688	0.0158537
hypothetical protein CDS	Expression Difference	1187036	1187908	873	1	forward	2.3	-2.3	-0.721497	0.00510224
RSA3 CDS	Expression Difference	7823390	7824052	663	1	reverse	2.4	-2.4	-0.721178	0.00426008
SLF1 CDS	Expression Difference	2833451	2834794	1344	1	forward	2.7	-2.7	-0.720883	0.00197981
hypothetical protein CDS	Expression Difference	11306857	11307939	1083	1	reverse	3	-3	-0.720778	0.000976842
UPC2 CDS	Expression Difference	2249773	2252514	2742	1	forward	1.9	-1.9	-0.719995	0.0137652
HMS2 CDS	Expression Difference	6536657	6537733	1077	1	forward	2.8	-2.8	-0.719188	0.00170081
TRL1 CDS	Expression Difference	6102463	6104946	2484	1	reverse	2.1	-2.1	-0.718315	0.00834724
AIF1 CDS	Expression Difference	10025238	10026374	1137	1	reverse	2	-2	-0.717022	0.0111421
PET122 CDS	Expression Difference	3365996	3366760	765	1	reverse	1.5	-1.5	-0.716662	0.0287083
CTF18 CDS	Expression Difference	8745708	8747933	2226	1	reverse	3.2	-3.2	-0.716322	0.0006619
GIP1 CDS	Expression Difference	558391	560310	1920	1	reverse	2.6	-2.6	-0.71618	0.00234272
GAT3 CDS	Expression Difference	7416367	7416792	426	1	forward	0.5	-0.5	-0.714732	0.299303
SAS5 CDS	Expression Difference	10776504	10777250	747	1	reverse	2.2	-2.2	-0.711858	0.00599489
RPS27A CDS	Expression Difference	6736825	6737424	249	2	forward	3	-3	-0.711453	0.000906712
MET8 CDS	Expression Difference	880586	881410	825	1	forward	2.3	-2.3	-0.711426	0.00477628
SXM1 CDS	Expression Difference	2623346	2626180	2835	1	forward	2.6	-2.6	-0.711346	0.00227554
OCT1 CDS	Expression Difference	6767336	6769654	2319	1	reverse	3.1	-3.1	-0.71085	0.000780543
UTP20 CDS	Expression Difference	457854	465335	7482	1	forward	1.4	-1.4	-0.707598	0.0363361
hypothetical protein CDS	Expression Difference	8311600	8312529	651	2	forward	1	-1	-0.707289	0.101914
TAR1 CDS	Expression Difference	7699724	7700098	375	1	forward	1.6	-1.6	-0.707257	0.0248807
FEN2 CDS	Expression Difference	1214288	1215826	1539	1	reverse	4.2	-4.2	-0.706899	5.95215e-05
CDC23 CDS	Expression Difference	5267100	5268980	1881	1	reverse	3.6	-3.6	-0.705209	0.000266696
hypothetical protein CDS	Expression Difference	2831570	2833021	1452	1	reverse	3.6	-3.6	-0.704765	0.000243632
hypothetical protein CDS	Expression Difference	1333041	1333199	159	1	forward	1.3	-1.3	-0.704061	0.0501291
AIM46 CDS	Expression Difference	5327420	5328352	933	1	reverse	2.4	-2.4	-0.703536	0.004027
POX1 CDS	Expression Difference	3847148	3849394	2247	1	forward	0.9	-0.9	-0.703456	0.115804
MRS4 CDS	Expression Difference	7110762	7111676	915	1	reverse	1.4	-1.4	-0.703188	0.0357748
CTM1 CDS	Expression Difference	5160240	5161997	1758	1	forward	3.1	-3.1	-0.702515	0.000746061
MCD1 CDS	Expression Difference	1804705	1806405	1701	1	forward	1.7	-1.7	-0.701607	0.019578
HCA4 CDS	Expression Difference	6216298	6218610	2313	1	forward	1.7	-1.7	-0.701484	0.0181616
GMH1 CDS	Expression Difference	7078494	7079315	822	1	forward	2.1	-2.1	-0.701125	0.00882687
TRM112 CDS	Expression Difference	9955424	9955831	408	1	forward	1.7	-1.7	-0.700691	0.0203191
CNS1 CDS	Expression Difference	779989	781146	1158	1	forward	1.9	-1.9	-0.69932	0.0127111
hypothetical protein CDS	Expression Difference	233125	235227	2004	2	reverse	1	-1	-0.69892	0.107677
PFA3 CDS	Expression Difference	9274973	9275983	1011	1	reverse	2.7	-2.7	-0.698603	0.00187111
ECM31 CDS	Expression Difference	813938	814876	939	1	forward	3.2	-3.2	-0.697933	0.000576271
HSP32 CDS	Expression Difference	11135147	11135860	714	1	forward	1.3	-1.3	-0.697173	0.0522298
NNF1 CDS	Expression Difference	6469491	6470096	606	1	forward	2.2	-2.2	-0.697007	0.00706124
FCF1 CDS	Expression Difference	2509973	2510542	570	1	reverse	2.2	-2.2	-0.695934	0.00677413
FRE8 CDS	Expression Difference	7484375	7486435	2061	1	reverse	1.3	-1.3	-0.69543	0.0485896
AXL1 CDS	Expression Difference	11905305	11908931	3627	1	forward	3.7	-3.7	-0.69527	0.000202777
VMR1 CDS	Expression Difference	4857908	4862686	4779	1	reverse	0.8	-0.8	-0.694994	0.16727
MET1 CDS	Expression Difference	7149824	7151605	1782	1	forward	2.3	-2.3	-0.693271	0.00469279
DLD2 CDS	Expression Difference	1499544	1501136	1593	1	forward	2	-2	-0.692915	0.0093007
ANT1 CDS	Expression Difference	11914478	11915464	987	1	reverse	3.3	-3.3	-0.6919	0.000485334
MBA1 CDS	Expression Difference	829341	830177	837	1	reverse	4.5	-4.5	-0.691708	3.25323e-05
ADK1 CDS	Expression Difference	2276508	2277176	669	1	forward	2.9	-2.9	-0.690568	0.00126281
TRS65 CDS	Expression Difference	4569505	4571187	1683	1	forward	4.7	-4.7	-0.690487	2.03514e-05
TIF35 CDS	Expression Difference	2684499	2685323	825	1	reverse	2.2	-2.2	-0.690171	0.00696155
NSG1 CDS	Expression Difference	5200652	5201527	876	1	reverse	2.6	-2.6	-0.690048	0.00259376
AAD6 CDS	Expression Difference	3483622	3484260	639	1	reverse	1.7	-1.7	-0.689881	0.0183556
SNF3 CDS	Expression Difference	1471602	1474256	2655	1	forward	2.2	-2.2	-0.688921	0.0063028
PSF3 CDS	Expression Difference	10080833	10081417	585	1	forward	3.1	-3.1	-0.688617	0.00084322
putative cystathionine gamma-synthase CDS	Expression Difference	8425067	8427016	1950	1	forward	1.4	-1.4	-0.688456	0.0366978
IMP4 CDS	Expression Difference	9733243	9734115	873	1	forward	1.5	-1.5	-0.688233	0.0295471
MRPL24 CDS	Expression Difference	8973241	8974017	777	1	forward	3.1	-3.1	-0.687809	0.000746318
ORC2 CDS	Expression Difference	590870	592732	1863	1	reverse	5.2	-5.2	-0.68711	6.8518e-06
RBG2 CDS	Expression Difference	4582844	4583950	1107	1	forward	2.7	-2.7	-0.686919	0.00190276
TTI2 CDS	Expression Difference	6509902	6511167	1266	1	reverse	1.8	-1.8	-0.686521	0.0153234
ERG3 CDS	Expression Difference	7498889	7499986	1098	1	forward	2.3	-2.3	-0.686316	0.00545811
MRS3 CDS	Expression Difference	5993080	5994024	945	1	forward	2.1	-2.1	-0.68405	0.00824035
FAF1 CDS	Expression Difference	5707666	5708706	1041	1	forward	1.5	-1.5	-0.684006	0.0322434
CDC21 CDS	Expression Difference	10498644	10499558	915	1	reverse	2.6	-2.6	-0.683767	0.00252085
SDS3 CDS	Expression Difference	5594849	5595832	984	1	reverse	2.1	-2.1	-0.682562	0.00880539
TPK3 CDS	Expression Difference	6712721	6713917	1197	1	reverse	3	-3	-0.681132	0.00095123
ISM1 CDS	Expression Difference	11599253	11602261	3009	1	reverse	4.3	-4.3	-0.680764	5.47857e-05
NAT2 CDS	Expression Difference	4525044	4525910	867	1	reverse	3.8	-3.8	-0.680397	0.000154586
GIS2 CDS	Expression Difference	9414965	9415426	462	1	reverse	1.8	-1.8	-0.678266	0.0159946
NCE103 CDS	Expression Difference	9807450	9808115	666	1	forward	1.8	-1.8	-0.678145	0.0157805
SUA5 CDS	Expression Difference	3925049	3926329	1281	1	forward	2.4	-2.4	-0.677495	0.00409445
PEX31 CDS	Expression Difference	4241928	4243316	1389	1	forward	2.7	-2.7	-0.677133	0.00196249
NIF3 CDS	Expression Difference	3820416	3821282	867	1	reverse	3.1	-3.1	-0.676833	0.000841813
hypothetical protein CDS	Expression Difference	2493282	2495453	2172	1	reverse	4	-4	-0.676609	9.98897e-05
BRE2 CDS	Expression Difference	7420255	7421772	1518	1	forward	2.9	-2.9	-0.676344	0.00138379
MRPS5 CDS	Expression Difference	951608	952531	924	1	forward	5.2	-5.2	-0.67448	6.71764e-06
hypothetical protein CDS	Expression Difference	9994579	9996402	1824	1	forward	1.6	-1.6	-0.672973	0.0240751
HXT15 CDS	Expression Difference	1371679	1373382	1704	1	reverse	1.4	-1.4	-0.672036	0.0378823
TTI1 CDS	Expression Difference	6953668	6956784	3117	1	forward	1.9	-1.9	-0.669898	0.011221
hypothetical protein CDS	Expression Difference	8422999	8424255	1257	1	reverse	1.1	-1.1	-0.669381	0.0748633
hypothetical protein CDS	Expression Difference	7235048	7235968	921	1	forward	0	0	-0.6692	NA
CLB1 CDS	Expression Difference	4442626	4444041	1416	1	forward	4	-4	-0.669154	0.000102669
NUP42 CDS	Expression Difference	2203591	2204883	1293	1	reverse	2.3	-2.3	-0.669018	0.00552567
PRT1 CDS	Expression Difference	11047330	11049621	2292	1	reverse	2.8	-2.8	-0.668005	0.00171296
RFC5 CDS	Expression Difference	653983	655047	1065	1	forward	2.4	-2.4	-0.667471	0.0043586
EAF6 CDS	Expression Difference	6414375	6414716	342	1	reverse	3	-3	-0.667395	0.000927232
TIF11 CDS	Expression Difference	9112583	9113044	462	1	reverse	1.5	-1.5	-0.667134	0.0347986
MSH2 CDS	Expression Difference	10179351	10182245	2895	1	forward	2.6	-2.6	-0.665715	0.00237123
MSW1 CDS	Expression Difference	2364026	2365165	1140	1	forward	1.9	-1.9	-0.662652	0.0139172
YPS5 CDS	Expression Difference	3747460	3747957	498	1	forward	1.1	-1.1	-0.662249	0.0820156
SLO1 CDS	Expression Difference	3442820	3443077	258	1	reverse	1.3	-1.3	-0.660423	0.0449566
CYB5 CDS	Expression Difference	9664576	9664938	363	1	reverse	1.2	-1.2	-0.65933	0.064379
RGD2 CDS	Expression Difference	3509250	3511394	2145	1	forward	4.1	-4.1	-0.65928	8.87339e-05
MPC54 CDS	Expression Difference	10697754	10699148	1395	1	reverse	0.8	-0.8	-0.659179	0.145942
PSE1 CDS	Expression Difference	9212157	9215426	3270	1	reverse	3.2	-3.2	-0.658389	0.000706822
SEC63 CDS	Expression Difference	10837001	10838992	1992	1	reverse	2	-2	-0.657599	0.0107368
AGP2 CDS	Expression Difference	729870	731660	1791	1	reverse	0.9	-0.9	-0.656933	0.121124
PET309 CDS	Expression Difference	7512841	7515738	2898	1	reverse	2.5	-2.5	-0.656796	0.00339679
FUN12 CDS	Expression Difference	76427	79435	3009	1	forward	4.3	-4.3	-0.656583	4.55188e-05
hypothetical protein CDS	Expression Difference	934888	935604	717	1	forward	1.8	-1.8	-0.655712	0.0164595
CWH41 CDS	Expression Difference	4182632	4185133	2502	1	reverse	2.4	-2.4	-0.655123	0.0041582
ATO3 CDS	Expression Difference	2601226	2602053	828	1	reverse	1.8	-1.8	-0.654144	0.0173974
SRP14 CDS	Expression Difference	1652803	1653243	441	1	forward	1.9	-1.9	-0.653917	0.0116413
GSP1 CDS	Expression Difference	7965799	7966458	660	1	reverse	3.1	-3.1	-0.653836	0.000799412
HSP33 CDS	Expression Difference	11110514	11111227	714	1	reverse	1	-1	-0.65307	0.109223
AIM4 CDS	Expression Difference	840256	840627	372	1	forward	2.5	-2.5	-0.652676	0.00328757
CAC2 CDS	Expression Difference	8391499	8392905	1407	1	forward	3.3	-3.3	-0.652195	0.000502469
hypothetical protein CDS	Expression Difference	1662486	1662692	207	1	reverse	2.2	-2.2	-0.652024	0.00597734
PET123 CDS	Expression Difference	10664133	10665089	957	1	forward	2.1	-2.1	-0.651454	0.00723038
SIN4 CDS	Expression Difference	9454566	9457490	2925	1	forward	3.8	-3.8	-0.651116	0.000156419
YKU80 CDS	Expression Difference	8801506	8803395	1890	1	reverse	2.2	-2.2	-0.65109	0.00669499
PAU4 CDS	Expression Difference	8307947	8308309	363	1	forward	1.8	-1.8	-0.650983	0.0161299
hypothetical protein CDS	Expression Difference	4236123	4237024	747	3	reverse	1.9	-1.9	-0.650166	0.0136476
RTT106 CDS	Expression Difference	9504424	9505791	1368	1	reverse	3.6	-3.6	-0.649285	0.000275698
hypothetical protein CDS	Expression Difference	9218921	9219874	954	1	reverse	1.1	-1.1	-0.648547	0.0811395
TCP1 CDS	Expression Difference	2247254	2248933	1680	1	forward	2.5	-2.5	-0.648298	0.00343866
MET7 CDS	Expression Difference	10818964	10820610	1647	1	forward	2.3	-2.3	-0.647897	0.00456435
RNH202 CDS	Expression Difference	2379390	2380442	1053	1	forward	1.8	-1.8	-0.647109	0.0161675
AFT1 CDS	Expression Difference	4111002	4113074	2073	1	forward	0.9	-0.9	-0.646675	0.114389
BIO2 CDS	Expression Difference	4802803	4803930	1128	1	reverse	1.5	-1.5	-0.646006	0.0297391
SPG5 CDS	Expression Difference	8968861	8969982	1122	1	forward	2.1	-2.1	-0.645569	0.00818018
hypothetical protein CDS	Expression Difference	7473936	7474610	675	1	reverse	0.7	-0.7	-0.644672	0.180986
TMA20 CDS	Expression Difference	3058192	3058840	546	2	reverse	2.3	-2.3	-0.644371	0.00519774
ELP4 CDS	Expression Difference	11483469	11484839	1371	1	forward	2.5	-2.5	-0.644286	0.00312973
MRPL39 CDS	Expression Difference	8574509	8574721	213	1	reverse	3.3	-3.3	-0.643447	0.000509546
CCT5 CDS	Expression Difference	6388375	6390063	1689	1	forward	2.7	-2.7	-0.64307	0.00184359
hypothetical protein CDS	Expression Difference	7678898	7679086	189	1	forward	1.4	-1.4	-0.642757	0.0414973
RFU1 CDS	Expression Difference	7526047	7526649	603	1	reverse	1.2	-1.2	-0.64208	0.0697084
JJJ1 CDS	Expression Difference	9468295	9470067	1773	1	reverse	1.5	-1.5	-0.641637	0.0300301
gag protein CDS	Expression Difference	451548	452870	1323	1	forward	2	-2	-0.641281	0.0096384
hypothetical protein CDS	Expression Difference	1257473	1258141	669	1	forward	2	-2	-0.64083	0.011047
DST1 CDS	Expression Difference	4156473	4157402	930	1	forward	3.2	-3.2	-0.640536	0.000626681
hypothetical protein CDS	Expression Difference	9577965	9578183	219	1	forward	1.1	-1.1	-0.640483	0.0751442
RKM3 CDS	Expression Difference	528510	530168	1659	1	forward	2.5	-2.5	-0.639556	0.00330244
ENO2 CDS	Expression Difference	5281257	5282570	1314	1	forward	1.8	-1.8	-0.639354	0.0151525
AMA1 CDS	Expression Difference	4684135	4686009	1782	2	forward	0.8	-0.8	-0.636704	0.157171
TIM12 CDS	Expression Difference	657373	657702	330	1	reverse	2.3	-2.3	-0.635526	0.00493275
KTI12 CDS	Expression Difference	6807151	6808092	942	1	reverse	2.3	-2.3	-0.634273	0.00502863
SAS2 CDS	Expression Difference	8845534	8846550	1017	1	reverse	1.7	-1.7	-0.63426	0.0214006
GET4 CDS	Expression Difference	10675363	10676301	939	1	reverse	2.2	-2.2	-0.633907	0.00582776
MRS6 CDS	Expression Difference	11061152	11062963	1812	1	reverse	3.2	-3.2	-0.632801	0.000589142
PFD1 CDS	Expression Difference	5921248	5921577	330	1	forward	1.8	-1.8	-0.632789	0.0167045
SKT5 CDS	Expression Difference	335534	337624	2091	1	reverse	3.3	-3.3	-0.632718	0.000452206
OGG1 CDS	Expression Difference	8475076	8476206	1131	1	forward	1.9	-1.9	-0.631148	0.011789
MPP10 CDS	Expression Difference	6271326	6273107	1782	1	forward	2	-2	-0.631001	0.00923795
URA6 CDS	Expression Difference	6970738	6971352	615	1	reverse	4.4	-4.4	-0.630623	4.31411e-05
POP8 CDS	Expression Difference	416216	416692	402	2	reverse	1.7	-1.7	-0.629545	0.0190678
ICP55 CDS	Expression Difference	3208762	3210297	1536	1	reverse	4.1	-4.1	-0.629167	8.73197e-05
YMC1 CDS	Expression Difference	11797011	11797934	924	1	forward	1.4	-1.4	-0.628678	0.0430868
DBP2 CDS	Expression Difference	9661275	9663917	1641	2	forward	0.8	-0.8	-0.62553	0.144875
PET191 CDS	Expression Difference	6329144	6329470	327	1	forward	3.1	-3.1	-0.624665	0.000837337
COX23 CDS	Expression Difference	5171595	5172050	456	1	forward	1.5	-1.5	-0.624622	0.0346339
GCD2 CDS	Expression Difference	4383850	4385805	1956	1	reverse	1.8	-1.8	-0.623757	0.0148283
hypothetical protein CDS	Expression Difference	8916572	8917678	1107	1	reverse	2.9	-2.9	-0.623327	0.00115443
LIP2 CDS	Expression Difference	7861360	7862346	987	1	reverse	2.1	-2.1	-0.623038	0.00857063
hypothetical protein CDS	Expression Difference	10914734	10914811	78	1	forward	1.4	-1.4	-0.621714	0.0441523
PEX25 CDS	Expression Difference	11460696	11461880	1185	1	reverse	4.5	-4.5	-0.621564	3.34724e-05
MSS51 CDS	Expression Difference	7795678	7796988	1311	1	reverse	2.3	-2.3	-0.621526	0.00560923
hypothetical protein CDS	Expression Difference	11471706	11472212	507	1	forward	2.1	-2.1	-0.620674	0.00795691
PCH2 CDS	Expression Difference	830771	832578	1695	2	forward	2.3	-2.3	-0.620299	0.0049814
WTM2 CDS	Expression Difference	10800378	10801781	1404	1	forward	3.1	-3.1	-0.619887	0.000832077
CHK1 CDS	Expression Difference	979812	981395	1584	1	forward	2.9	-2.9	-0.619239	0.00130283
hypothetical protein CDS	Expression Difference	11166543	11167604	1062	1	reverse	4	-4	-0.619119	9.51453e-05
JEM1 CDS	Expression Difference	6135642	6137579	1938	1	forward	3.1	-3.1	-0.618001	0.000781875
KAP104 CDS	Expression Difference	501165	503921	2757	1	reverse	4.8	-4.8	-0.61797	1.62592e-05
TDA5 CDS	Expression Difference	8232090	8233141	981	2	forward	2.6	-2.6	-0.61702	0.00244925
MRPS9 CDS	Expression Difference	765478	766314	837	1	forward	4.1	-4.1	-0.616626	8.70446e-05
RAD61 CDS	Expression Difference	1834068	1836011	1944	1	forward	1.9	-1.9	-0.616599	0.012172
MRP1 CDS	Expression Difference	2529200	2530165	966	1	forward	3.6	-3.6	-0.616492	0.000256959
MES1 CDS	Expression Difference	4758588	4760843	2256	1	reverse	1.7	-1.7	-0.616236	0.0203624
FPR4 CDS	Expression Difference	8275862	8277040	1179	1	forward	1.1	-1.1	-0.615591	0.0832812
MSS1 CDS	Expression Difference	8642642	8644222	1581	1	reverse	2.6	-2.6	-0.614075	0.0024903
ELG1 CDS	Expression Difference	10634686	10637061	2376	1	reverse	2.4	-2.4	-0.613547	0.00431813
GCG1 CDS	Expression Difference	3395039	3395737	699	1	reverse	2.4	-2.4	-0.613092	0.00431862
CDC43 CDS	Expression Difference	3953071	3954201	1131	1	forward	2.5	-2.5	-0.61154	0.00307356
SNO4 CDS	Expression Difference	9241571	9242284	714	1	reverse	1	-1	-0.609265	0.0903613
ISY1 CDS	Expression Difference	6361158	6361865	708	1	forward	2.3	-2.3	-0.608675	0.00558681
cysteine--tRNA ligase CDS	Expression Difference	9430511	9432814	2304	1	forward	1.9	-1.9	-0.608466	0.0137399
hypothetical protein CDS	Expression Difference	11055430	11057541	2112	1	reverse	2.4	-2.4	-0.608076	0.00446071
MDM38 CDS	Expression Difference	10303972	10305693	1722	1	reverse	3.2	-3.2	-0.608006	0.00069511
NDJ1 CDS	Expression Difference	10148365	10149423	1059	1	reverse	0.5	-0.5	-0.60784	0.297554
hypothetical protein CDS	Expression Difference	7490615	7491100	486	1	reverse	1.6	-1.6	-0.607525	0.0266467
SGF73 CDS	Expression Difference	4116599	4118572	1974	1	forward	2.8	-2.8	-0.607292	0.0016609
HEL2 CDS	Expression Difference	2360126	2362045	1920	1	reverse	4.6	-4.6	-0.604876	2.42881e-05
NUP84 CDS	Expression Difference	1611588	1613768	2181	1	forward	2.6	-2.6	-0.604758	0.00269323
SPC3 CDS	Expression Difference	7512197	7512751	555	1	forward	1.5	-1.5	-0.603982	0.0321345
YAP3 CDS	Expression Difference	4913998	4914990	993	1	reverse	3.5	-3.5	-0.603451	0.000351585
REH1 CDS	Expression Difference	8141402	8142700	1299	1	reverse	1.6	-1.6	-0.602188	0.0227871
VBA3 CDS	Expression Difference	1053108	1054484	1377	1	forward	0	0	-0.602148	NA
TRM7 CDS	Expression Difference	595005	595937	933	1	reverse	2	-2	-0.601485	0.010234
LEU3 CDS	Expression Difference	8281121	8283781	2661	1	forward	1.9	-1.9	-0.601398	0.0138879
GDS1 CDS	Expression Difference	11037106	11038674	1569	1	forward	1.6	-1.6	-0.601208	0.0242855
TAF8 CDS	Expression Difference	8365248	8366780	1533	1	reverse	2.2	-2.2	-0.601206	0.00657263
JHD2 CDS	Expression Difference	6476765	6478951	2187	1	reverse	1.7	-1.7	-0.600283	0.0203995
ALT1 CDS	Expression Difference	7563265	7565043	1779	1	reverse	1.1	-1.1	-0.600089	0.0841432
CBR1 CDS	Expression Difference	5666645	5667499	855	1	reverse	2.2	-2.2	-0.59962	0.00610676
MDN1 CDS	Expression Difference	7594034	7608766	14733	1	reverse	1	-1	-0.599075	0.0963909
HIT1 CDS	Expression Difference	6371233	6371727	495	1	forward	1.5	-1.5	-0.598972	0.0284566
SER33 CDS	Expression Difference	5613654	5615063	1410	1	reverse	1.3	-1.3	-0.597272	0.0526832
SHM1 CDS	Expression Difference	966482	967954	1473	1	forward	2.1	-2.1	-0.595546	0.00846276
YCK3 CDS	Expression Difference	3296768	3298342	1575	1	forward	4	-4	-0.594666	9.14326e-05
GCD11 CDS	Expression Difference	3097206	3098789	1584	1	forward	2.7	-2.7	-0.593859	0.0021384
YIP1 CDS	Expression Difference	4581835	4582581	747	1	reverse	1.8	-1.8	-0.593495	0.0142892
SRP68 CDS	Expression Difference	11211777	11213576	1800	1	forward	2.5	-2.5	-0.593007	0.00297303
YKE2 CDS	Expression Difference	7794040	7794384	345	1	forward	1.8	-1.8	-0.592152	0.0177822
GRX5 CDS	Expression Difference	11567839	11568291	453	1	forward	1.9	-1.9	-0.592085	0.0117149
CSM2 CDS	Expression Difference	5492433	5493074	642	1	reverse	1.1	-1.1	-0.591652	0.0841593
AIM1 CDS	Expression Difference	57029	57385	357	1	reverse	2	-2	-0.590876	0.00896954
AIM45 CDS	Expression Difference	11687267	11688301	1035	1	reverse	2.2	-2.2	-0.590512	0.00690906
MCM22 CDS	Expression Difference	6508520	6509239	720	1	reverse	1.4	-1.4	-0.590072	0.0370424
RGI2 CDS	Expression Difference	5640475	5640969	495	1	reverse	0.7	-0.7	-0.588994	0.223286
IPL1 CDS	Expression Difference	11279750	11280853	1104	1	reverse	1	-1	-0.58809	0.105199
FOB1 CDS	Expression Difference	2036124	2037824	1701	1	forward	2.1	-2.1	-0.587996	0.00731718
POL30 CDS	Expression Difference	655208	655984	777	1	reverse	1.5	-1.5	-0.587466	0.030591
RRN7 CDS	Expression Difference	6226428	6227972	1545	1	forward	1.7	-1.7	-0.587351	0.0218449
putative cysteine synthase CDS	Expression Difference	4252149	4253330	1182	1	forward	3.3	-3.3	-0.587332	0.000451538
RML2 CDS	Expression Difference	2951625	2952806	1182	1	reverse	2.1	-2.1	-0.586802	0.00802019
MRI1 CDS	Expression Difference	11891012	11892247	1236	1	forward	1.8	-1.8	-0.586722	0.0151762
ECM32 CDS	Expression Difference	3433645	3437010	3366	1	forward	2.9	-2.9	-0.584439	0.00115599
HSP26 CDS	Expression Difference	612248	612892	645	1	forward	0.8	-0.8	-0.584215	0.175097
MSI1 CDS	Expression Difference	840832	842100	1269	1	reverse	2.4	-2.4	-0.584194	0.00441123
ROY1 CDS	Expression Difference	9105825	9107486	1662	1	reverse	2.2	-2.2	-0.582891	0.00583804
hypothetical protein CDS	Expression Difference	1201940	1203775	1836	1	reverse	1.8	-1.8	-0.582209	0.0162733
PAN6 CDS	Expression Difference	5468927	5469856	930	1	reverse	2.2	-2.2	-0.582162	0.00602882
UGA3 CDS	Expression Difference	1516340	1517926	1587	1	forward	2.2	-2.2	-0.582133	0.00700119
HXT16 CDS	Expression Difference	6564901	6566604	1704	1	forward	1.2	-1.2	-0.580775	0.0576585
BMS1 CDS	Expression Difference	11262880	11266431	3552	1	reverse	1.5	-1.5	-0.579699	0.0285004
XDJ1 CDS	Expression Difference	7565729	7567108	1380	1	forward	2.1	-2.1	-0.579031	0.00753856
SWI4 CDS	Expression Difference	3274550	3277831	3282	1	reverse	2.1	-2.1	-0.578746	0.00749271
AIM36 CDS	Expression Difference	8894482	8895249	768	1	reverse	3.3	-3.3	-0.578098	0.000510872
GCV3 CDS	Expression Difference	57950	58462	513	1	reverse	1.3	-1.3	-0.576372	0.046015
TDH1 CDS	Expression Difference	6170732	6171730	999	1	forward	0.7	-0.7	-0.575941	0.18743
CAB2 CDS	Expression Difference	5596129	5597226	1098	1	reverse	4	-4	-0.575914	9.81804e-05
ISD11 CDS	Expression Difference	3142673	3142957	285	1	forward	2.1	-2.1	-0.575859	0.00832723
SDA1 CDS	Expression Difference	4718755	4721058	2304	1	reverse	1	-1	-0.575769	0.0901469
hypothetical protein CDS	Expression Difference	6316420	6318657	2238	1	reverse	1.4	-1.4	-0.575576	0.0431845
ERG7 CDS	Expression Difference	5069028	5071223	2196	1	forward	1.6	-1.6	-0.575546	0.0243661
GUK1 CDS	Expression Difference	2726286	2726849	564	1	reverse	1.7	-1.7	-0.57554	0.0201493
ATE1 CDS	Expression Difference	4198844	4200355	1512	1	forward	2.2	-2.2	-0.575452	0.0058095
CAF20 CDS	Expression Difference	10873302	10873787	486	1	forward	2.4	-2.4	-0.575333	0.00441711
PET54 CDS	Expression Difference	4678913	4679794	882	1	forward	3.3	-3.3	-0.57485	0.000511961
hypothetical protein CDS	Expression Difference	4464039	4465469	1431	1	reverse	2.5	-2.5	-0.574461	0.00348691
ZDS2 CDS	Expression Difference	8374845	8377673	2829	1	forward	2.1	-2.1	-0.574043	0.00748225
NMD4 CDS	Expression Difference	8097523	8098179	657	1	reverse	2	-2	-0.573742	0.0100904
RSM28 CDS	Expression Difference	2796952	2798037	1086	1	forward	2.2	-2.2	-0.573448	0.0061666
hypothetical protein CDS	Expression Difference	9861271	9861996	726	1	forward	2.1	-2.1	-0.572804	0.00835166
FRS2 CDS	Expression Difference	3562328	3563839	1512	1	reverse	3.4	-3.4	-0.572472	0.00043816
gag protein CDS	Expression Difference	8684510	8685832	1323	1	reverse	1.5	-1.5	-0.572351	0.0287741
hypothetical protein CDS	Expression Difference	9816158	9817327	1170	1	reverse	1.9	-1.9	-0.572004	0.0119904
GUT1 CDS	Expression Difference	4866309	4868438	2130	1	reverse	1	-1	-0.572002	0.102108
hypothetical protein CDS	Expression Difference	4409378	4410901	1524	1	forward	2.1	-2.1	-0.571861	0.0075335
KEG1 CDS	Expression Difference	3707287	3707889	603	1	forward	2	-2	-0.57164	0.0105546
MRP21 CDS	Expression Difference	279043	279576	534	1	forward	3.4	-3.4	-0.570975	0.000428457
TAF14 CDS	Expression Difference	11428558	11429397	735	2	forward	3.1	-3.1	-0.570928	0.000740286
RBS1 CDS	Expression Difference	1482238	1483611	1374	1	forward	3	-3	-0.570669	0.000941042
MMT1 CDS	Expression Difference	8939771	8941303	1533	1	forward	2.9	-2.9	-0.570649	0.0012102
DML1 CDS	Expression Difference	9012288	9013715	1428	1	forward	1.9	-1.9	-0.570055	0.0114619
hypothetical protein CDS	Expression Difference	302084	303190	1107	1	forward	1.2	-1.2	-0.569892	0.0592854
QRI7 CDS	Expression Difference	1633675	1634898	1224	1	reverse	2	-2	-0.569864	0.0089395
YAE1 CDS	Expression Difference	6399480	6399905	426	1	reverse	1.4	-1.4	-0.569063	0.0383021
NMD2 CDS	Expression Difference	5082304	5085686	3270	2	reverse	2.8	-2.8	-0.568833	0.00176024
AAD16 CDS	Expression Difference	3483134	3483592	459	1	reverse	1.5	-1.5	-0.568813	0.030408
SUI3 CDS	Expression Difference	11223756	11224613	858	1	forward	2.1	-2.1	-0.568637	0.00768258
SDO1 CDS	Expression Difference	7429202	7429954	753	1	reverse	2.5	-2.5	-0.568345	0.00321106
CUP9 CDS	Expression Difference	11336302	11337222	921	1	reverse	1.9	-1.9	-0.567797	0.0139521
HAT2 CDS	Expression Difference	2939123	2940328	1206	1	forward	2.5	-2.5	-0.567506	0.00317595
TOF1 CDS	Expression Difference	9370519	9374235	3717	1	forward	2	-2	-0.567227	0.0100867
NOP15 CDS	Expression Difference	9665462	9666124	663	1	reverse	1.1	-1.1	-0.566689	0.072903
gag protein CDS	Expression Difference	4915839	4917080	1242	1	forward	0.5	-0.5	-0.566277	0.30003
AAC3 CDS	Expression Difference	646201	647124	924	1	forward	1.1	-1.1	-0.566206	0.0825994
NAT5 CDS	Expression Difference	10836346	10836876	531	1	forward	1.2	-1.2	-0.564541	0.0617077
PAC2 CDS	Expression Difference	3056482	3058038	1557	1	forward	1.5	-1.5	-0.562755	0.0335644
BUD17 CDS	Expression Difference	9922559	9923512	954	1	forward	2.3	-2.3	-0.561355	0.00515163
KDX1 CDS	Expression Difference	6727598	6728899	1302	1	reverse	1.1	-1.1	-0.561093	0.0859485
ORC6 CDS	Expression Difference	5174251	5175558	1308	1	reverse	2.9	-2.9	-0.56014	0.00113089
DIM1 CDS	Expression Difference	11162381	11163337	957	1	forward	1.1	-1.1	-0.559687	0.0805701
SUT1 CDS	Expression Difference	3937128	3938027	900	1	forward	0.7	-0.7	-0.559399	0.210436
FCY22 CDS	Expression Difference	3168527	3170119	1593	1	forward	0.8	-0.8	-0.55836	0.170648
PML1 CDS	Expression Difference	7421830	7422444	615	1	reverse	2.7	-2.7	-0.558168	0.00196948
RSA1 CDS	Expression Difference	11304663	11305808	1146	1	forward	2.1	-2.1	-0.558044	0.00714046
STE4 CDS	Expression Difference	10774879	10776150	1272	1	forward	1.3	-1.3	-0.557553	0.0451148
PUT3 CDS	Expression Difference	6986756	6989695	2940	1	forward	1.6	-1.6	-0.557225	0.0236448
RRP4 CDS	Expression Difference	5063509	5064588	1080	1	reverse	2.4	-2.4	-0.557061	0.00422212
NBL1 CDS	Expression Difference	5328501	5328789	222	2	reverse	1	-1	-0.556392	0.0903413
DFR1 CDS	Expression Difference	10812875	10813510	636	1	forward	3.1	-3.1	-0.556065	0.000727408
LYS9 CDS	Expression Difference	9961684	9963024	1341	1	reverse	0.8	-0.8	-0.555767	0.176333
SEC72 CDS	Expression Difference	7964817	7965398	582	1	reverse	1.4	-1.4	-0.555694	0.0361719
CNA1 CDS	Expression Difference	8249375	8251036	1662	1	reverse	2.5	-2.5	-0.553397	0.00345765
SOL3 CDS	Expression Difference	5253654	5254403	750	1	forward	2.2	-2.2	-0.552192	0.00630861
SPE4 CDS	Expression Difference	7677851	7678753	903	1	reverse	1.4	-1.4	-0.551401	0.0388391
LCB4 CDS	Expression Difference	10683979	10685853	1875	1	reverse	3.2	-3.2	-0.551204	0.000700716
TAZ1 CDS	Expression Difference	11937651	11938796	1146	1	forward	2.3	-2.3	-0.550568	0.00496515
ELA1 CDS	Expression Difference	9465159	9466298	1140	1	reverse	1.3	-1.3	-0.550567	0.0480533
POP4 CDS	Expression Difference	959103	959942	840	1	forward	1.4	-1.4	-0.550443	0.043857
TOS4 CDS	Expression Difference	7765571	7767040	1470	1	reverse	1.3	-1.3	-0.550113	0.0472401
PML39 CDS	Expression Difference	8378470	8379474	1005	1	reverse	2.1	-2.1	-0.549703	0.00874413
URH1 CDS	Expression Difference	2631085	2632107	1023	1	forward	1.7	-1.7	-0.549544	0.0198841
SHY1 CDS	Expression Difference	4456348	4457517	1170	1	forward	2.7	-2.7	-0.549469	0.00223614
SLM3 CDS	Expression Difference	1752681	1753934	1254	1	reverse	1.9	-1.9	-0.549154	0.0131873
ADK2 CDS	Expression Difference	3417929	3418606	678	1	forward	1.9	-1.9	-0.549007	0.0134906
AEP2 CDS	Expression Difference	9156561	9158303	1743	1	reverse	2.7	-2.7	-0.548995	0.00215661
DAT1 CDS	Expression Difference	8367250	8367996	747	1	forward	1.3	-1.3	-0.548863	0.0476777
hypothetical protein CDS	Expression Difference	5994375	5996627	2253	1	forward	1.4	-1.4	-0.548633	0.043049
NUP85 CDS	Expression Difference	6346516	6348750	2235	1	forward	2.1	-2.1	-0.548215	0.00744734
GCD6 CDS	Expression Difference	2244749	2246887	2139	1	forward	2.3	-2.3	-0.547899	0.00526202
hypothetical protein CDS	Expression Difference	5574690	5575700	1011	1	reverse	1.4	-1.4	-0.547016	0.0430154
hypothetical protein CDS	Expression Difference	8377998	8378315	318	1	forward	1.3	-1.3	-0.546679	0.0475721
RPB10 CDS	Expression Difference	10770289	10770501	213	1	forward	1.4	-1.4	-0.546179	0.0420037
NOB1 CDS	Expression Difference	10462216	10463595	1380	1	reverse	1.4	-1.4	-0.545536	0.039195
UAF30 CDS	Expression Difference	10901177	10901863	687	1	forward	1.9	-1.9	-0.543242	0.0122513
TOM5 CDS	Expression Difference	11920817	11920969	153	1	forward	2.1	-2.1	-0.542485	0.00861038
ENT4 CDS	Expression Difference	7310803	7311546	744	1	reverse	1.3	-1.3	-0.542185	0.055523
HEM4 CDS	Expression Difference	10874786	10875613	828	1	forward	1.8	-1.8	-0.542088	0.017219
hypothetical protein CDS	Expression Difference	4535082	4535735	654	1	forward	1.6	-1.6	-0.541682	0.0281399
TFB2 CDS	Expression Difference	11442486	11444027	1542	1	reverse	2.3	-2.3	-0.540983	0.00474959
COQ2 CDS	Expression Difference	9948177	9949295	1119	1	reverse	2.3	-2.3	-0.540816	0.00476442
DTR1 CDS	Expression Difference	819959	821677	1719	1	forward	0.5	-0.5	-0.540579	0.322509
hypothetical protein CDS	Expression Difference	4359911	4360789	879	1	reverse	1.6	-1.6	-0.540066	0.0227558
RMA1 CDS	Expression Difference	6771786	6773078	1293	1	reverse	1.5	-1.5	-0.539728	0.0313962
RRP6 CDS	Expression Difference	10358801	10361002	2202	1	forward	2	-2	-0.53961	0.0110358
RRP17 CDS	Expression Difference	2654715	2655422	708	1	forward	1.3	-1.3	-0.539382	0.0521868
RMD8 CDS	Expression Difference	3714975	3716963	1989	1	forward	2.4	-2.4	-0.538875	0.00416448
URA5 CDS	Expression Difference	8379978	8380658	681	1	forward	1.2	-1.2	-0.538586	0.0625004
NUP82 CDS	Expression Difference	6152477	6154618	2142	1	forward	1.9	-1.9	-0.538473	0.0137538
ECM4 CDS	Expression Difference	7160495	7161607	1113	1	forward	0.6	-0.6	-0.538455	0.225646
SPC24 CDS	Expression Difference	8824455	8825096	642	1	reverse	0.9	-0.9	-0.536612	0.116964
DAD1 CDS	Expression Difference	1838496	1838780	285	1	reverse	1.8	-1.8	-0.536125	0.0155994
RSC2 CDS	Expression Difference	8086359	8089028	2670	1	forward	1.9	-1.9	-0.535923	0.013423
QRI1 CDS	Expression Difference	1635170	1636603	1434	1	reverse	2.2	-2.2	-0.53585	0.00618706
hypothetical protein CDS	Expression Difference	7448318	7449109	792	1	forward	1.4	-1.4	-0.535759	0.0382046
NAN1 CDS	Expression Difference	11433470	11436160	2691	1	forward	1.4	-1.4	-0.535312	0.0373222
putative helicase CDS	Expression Difference	8203456	8207763	4308	1	forward	2.3	-2.3	-0.534799	0.00534397
HEM2 CDS	Expression Difference	4158517	4159545	1029	1	reverse	2.3	-2.3	-0.534573	0.00476503
SSF2 CDS	Expression Difference	2447603	2448964	1362	1	forward	1.2	-1.2	-0.53418	0.064744
NKP1 CDS	Expression Difference	2599982	2600698	717	1	reverse	2	-2	-0.533971	0.00993315
APC2 CDS	Expression Difference	7640786	7643347	2562	1	reverse	2.2	-2.2	-0.532565	0.00657002
TOM7 CDS	Expression Difference	9741002	9741184	183	1	forward	1.4	-1.4	-0.532403	0.0364832
PAB1 CDS	Expression Difference	3402328	3404061	1734	1	forward	1.7	-1.7	-0.532385	0.0193249
POL31 CDS	Expression Difference	6281663	6283126	1464	1	forward	2.6	-2.6	-0.529844	0.00246799
AVL9 CDS	Expression Difference	7619972	7622266	2295	1	reverse	2.4	-2.4	-0.529632	0.00368112
PTH2 CDS	Expression Difference	343019	343645	627	1	reverse	2.3	-2.3	-0.529592	0.00553155
DPH1 CDS	Expression Difference	5564324	5565601	1278	1	forward	1.8	-1.8	-0.528491	0.0170064
FSH2 CDS	Expression Difference	9038843	9039514	672	1	reverse	2.9	-2.9	-0.526535	0.00138498
KSH1 CDS	Expression Difference	9834238	9834456	219	1	reverse	1.4	-1.4	-0.526218	0.0364902
CSI2 CDS	Expression Difference	10343311	10344336	1026	1	reverse	1.2	-1.2	-0.526002	0.0598862
PRP24 CDS	Expression Difference	9126093	9127427	1335	1	reverse	1.6	-1.6	-0.525986	0.0257415
TPA1 CDS	Expression Difference	3143683	3145617	1935	1	forward	1.1	-1.1	-0.525497	0.0748666
BUD14 CDS	Expression Difference	166742	168871	2130	1	reverse	1.7	-1.7	-0.525253	0.0216561
NBP1 CDS	Expression Difference	8300840	8301799	960	1	reverse	1.9	-1.9	-0.524568	0.0134737
hypothetical protein CDS	Expression Difference	3375280	3376296	1017	1	reverse	1.4	-1.4	-0.523768	0.0409737
CTR3 CDS	Expression Difference	8192281	8193006	726	1	forward	0.8	-0.8	-0.523328	0.146824
hypothetical protein CDS	Expression Difference	7956019	7957086	1068	1	reverse	1.7	-1.7	-0.522758	0.0211125
UBP8 CDS	Expression Difference	9039920	9041335	1416	1	forward	1.5	-1.5	-0.5207	0.0297927
PCT1 CDS	Expression Difference	4642464	4643738	1275	1	reverse	2.2	-2.2	-0.520067	0.00705738
gag-pol fusion protein CDS	Expression Difference	4915839	4921248	5409	2	forward	1.2	-1.2	-0.51893	0.0603993
RAM2 CDS	Expression Difference	6980780	6981730	951	1	forward	2.7	-2.7	-0.518695	0.00197608
NMT1 CDS	Expression Difference	7786965	7788332	1368	1	reverse	1.4	-1.4	-0.518656	0.0404579
hypothetical protein CDS	Expression Difference	3458185	3458610	426	1	forward	1.3	-1.3	-0.518517	0.0544848
ECM25 CDS	Expression Difference	5886840	5888639	1800	1	forward	2.5	-2.5	-0.518422	0.00343272
RMD9 CDS	Expression Difference	4043323	4045263	1941	1	reverse	2.4	-2.4	-0.517208	0.00386048
TIM44 CDS	Expression Difference	5703738	5705033	1296	1	forward	1.7	-1.7	-0.516203	0.0212218
SNU13 CDS	Expression Difference	2993898	2994278	381	1	forward	1.1	-1.1	-0.514854	0.0726754
UBC13 CDS	Expression Difference	1989898	1990627	462	2	forward	2	-2	-0.514385	0.00905718
NTG1 CDS	Expression Difference	126903	128102	1200	1	reverse	1.9	-1.9	-0.513898	0.0139795
DPH5 CDS	Expression Difference	7746288	7747190	903	1	reverse	1.7	-1.7	-0.513496	0.0202335
HST4 CDS	Expression Difference	2202359	2203471	1113	1	forward	2.2	-2.2	-0.513182	0.00596585
BSC5 CDS	Expression Difference	10008759	10010228	1470	1	reverse	1	-1	-0.512824	0.104423
HXT17 CDS	Expression Difference	10020293	10021987	1695	1	forward	0.6	-0.6	-0.512083	0.260159
PBS2 CDS	Expression Difference	6010558	6012564	2007	1	reverse	2.9	-2.9	-0.511318	0.00132131
YEH1 CDS	Expression Difference	7370562	7372283	1722	1	forward	1.3	-1.3	-0.51025	0.0531696
ZAP1 CDS	Expression Difference	6162892	6165534	2643	1	reverse	1.7	-1.7	-0.50999	0.0187032
SES1 CDS	Expression Difference	1849530	1850918	1389	1	forward	1.2	-1.2	-0.509111	0.0636353
RNH203 CDS	Expression Difference	7693010	7693342	333	1	reverse	1.4	-1.4	-0.508658	0.0433234
RFA1 CDS	Expression Difference	156754	158619	1866	1	reverse	1.4	-1.4	-0.508538	0.0443319
MRPL13 CDS	Expression Difference	7028635	7029429	795	1	reverse	2.3	-2.3	-0.507876	0.00514308
SEC12 CDS	Expression Difference	9920910	9922325	1416	1	reverse	2.5	-2.5	-0.507428	0.00337763
SRP102 CDS	Expression Difference	6739813	6740547	735	1	forward	1	-1	-0.507327	0.107369
PRP31 CDS	Expression Difference	4405331	4406815	1485	1	forward	1.8	-1.8	-0.506502	0.0161604
COG6 CDS	Expression Difference	9797104	9799623	2520	1	reverse	1.8	-1.8	-0.506362	0.0156762
STB1 CDS	Expression Difference	9300298	9301560	1263	1	forward	1.7	-1.7	-0.506118	0.0211458
PGD1 CDS	Expression Difference	4187754	4188947	1194	1	reverse	2.9	-2.9	-0.50537	0.00112208
MRPL50 CDS	Expression Difference	9917410	9917829	420	1	reverse	1.9	-1.9	-0.504754	0.0139683
APC4 CDS	Expression Difference	2045904	2047862	1959	1	forward	1.7	-1.7	-0.504747	0.0213148
gag-pol fusion protein CDS	Expression Difference	1874065	1879378	5313	2	reverse	1.5	-1.5	-0.504493	0.0300033
RRP15 CDS	Expression Difference	11941583	11942335	753	1	forward	1.5	-1.5	-0.504407	0.032731
PEX5 CDS	Expression Difference	2310585	2312423	1839	1	forward	2	-2	-0.503437	0.00921348
EFM2 CDS	Expression Difference	975070	976329	1260	1	forward	1.2	-1.2	-0.502857	0.0590133
NUP133 CDS	Expression Difference	7171037	7174510	3474	1	forward	2.1	-2.1	-0.502736	0.00834089
KTR5 CDS	Expression Difference	9824841	9826409	1569	1	reverse	1.8	-1.8	-0.500846	0.0152808
CCA1 CDS	Expression Difference	3412984	3414624	1641	1	reverse	2.6	-2.6	-0.500415	0.00263043
PHO90 CDS	Expression Difference	5893305	5895950	2646	1	forward	1.1	-1.1	-0.500247	0.0712124
gag-pol fusion protein CDS	Expression Difference	2232134	2237447	5313	2	forward	1.6	-1.6	-0.500029	0.0244933
MRH4 CDS	Expression Difference	4120513	4122198	1686	1	reverse	1.1	-1.1	-0.499878	0.0735576
RVB1 CDS	Expression Difference	2200626	2202017	1392	1	reverse	1.8	-1.8	-0.499774	0.0163615
NUP60 CDS	Expression Difference	152257	153876	1620	1	forward	2.6	-2.6	-0.499371	0.00227247
PAU2 CDS	Expression Difference	2955683	2956045	363	1	forward	0.8	-0.8	-0.498738	0.156853
LST4 CDS	Expression Difference	6693712	6696198	2487	1	reverse	2.1	-2.1	-0.496879	0.00746614
SEN34 CDS	Expression Difference	158966	159793	828	1	forward	1	-1	-0.495403	0.096378
hypothetical protein CDS	Expression Difference	9009116	9010489	1374	1	reverse	1.8	-1.8	-0.495082	0.0176413
PRP2 CDS	Expression Difference	9891956	9894586	2631	1	reverse	1.3	-1.3	-0.49427	0.0473449
OAZ1 CDS	Expression Difference	11582059	11582938	879	2	forward	1.1	-1.1	-0.49416	0.0851707
NIT2 CDS	Expression Difference	6016962	6017885	924	1	forward	1.8	-1.8	-0.494151	0.0145445
NAS6 CDS	Expression Difference	4692950	4693636	687	1	forward	1.3	-1.3	-0.494055	0.0496749
MDJ2 CDS	Expression Difference	9270470	9270910	441	1	reverse	0.7	-0.7	-0.493916	0.181943
hypothetical protein CDS	Expression Difference	5693402	5693830	429	1	reverse	0.9	-0.9	-0.49379	0.120634
TOS6 CDS	Expression Difference	9313380	9313688	309	1	forward	0.8	-0.8	-0.493624	0.154169
ULI1 CDS	Expression Difference	3674577	3675086	510	1	reverse	0.9	-0.9	-0.493528	0.119745
hypothetical protein CDS	Expression Difference	2572460	2572858	399	1	reverse	0.6	-0.6	-0.493205	0.277229
GAL4 CDS	Expression Difference	11202971	11205616	2646	1	reverse	1.5	-1.5	-0.492717	0.032973
PEX14 CDS	Expression Difference	3955263	3956288	1026	1	forward	2	-2	-0.491991	0.0100134
PET8 CDS	Expression Difference	9872611	9873465	855	1	reverse	1.6	-1.6	-0.4914	0.0258132
EST3 CDS	Expression Difference	5728239	5728785	546	2	reverse	1.5	-1.5	-0.490211	0.0335372
FBP1 CDS	Expression Difference	8118774	8119820	1047	1	reverse	1.1	-1.1	-0.490082	0.0752228
SEN15 CDS	Expression Difference	8714304	8714690	387	1	forward	1.3	-1.3	-0.490082	0.0480813
hypothetical protein CDS	Expression Difference	9916013	9917227	1215	1	forward	1.4	-1.4	-0.489166	0.0391194
FUS1 CDS	Expression Difference	1115205	1116743	1539	1	forward	0.9	-0.9	-0.487935	0.124667
MSC6 CDS	Expression Difference	11033116	11035194	2079	1	reverse	3.3	-3.3	-0.487854	0.000505959
AGX1 CDS	Expression Difference	3545660	3546817	1158	1	forward	0.9	-0.9	-0.487637	0.126455
YMR31 CDS	Expression Difference	3717352	3717723	372	1	forward	1.5	-1.5	-0.487505	0.0282096
AIM32 CDS	Expression Difference	8496344	8497279	936	1	forward	1.8	-1.8	-0.48728	0.0165049
hypothetical protein CDS	Expression Difference	1030341	1030460	120	1	reverse	0.3	-0.3	-0.487033	0.466118
AAD10 CDS	Expression Difference	6559866	6560732	867	1	forward	2.3	-2.3	-0.486647	0.00472788
hypothetical protein CDS	Expression Difference	10047202	10047474	273	1	reverse	0.8	-0.8	-0.486281	0.157276
hypothetical protein CDS	Expression Difference	4262777	4263670	894	1	forward	1.3	-1.3	-0.485728	0.0460298
BER1 CDS	Expression Difference	8193396	8194220	825	1	forward	2.2	-2.2	-0.484543	0.0066933
NBP35 CDS	Expression Difference	4081046	4082032	987	1	reverse	1.7	-1.7	-0.4844	0.0207061
TAH1 CDS	Expression Difference	1267801	1268136	336	1	forward	1.5	-1.5	-0.484149	0.0323463
SPT21 CDS	Expression Difference	8943063	8945339	2277	1	forward	1.1	-1.1	-0.483888	0.0793719
APL6 CDS	Expression Difference	4753311	4755740	2430	1	reverse	1.6	-1.6	-0.48376	0.0227768
SPE2 CDS	Expression Difference	10264415	10265605	1191	1	reverse	1.3	-1.3	-0.483736	0.0560664
NUP57 CDS	Expression Difference	4467036	4468661	1626	1	reverse	2.4	-2.4	-0.482627	0.00421212
hypothetical protein CDS	Expression Difference	11811432	11812067	636	1	forward	1.2	-1.2	-0.482616	0.0604654
ODC2 CDS	Expression Difference	10790299	10791222	924	1	forward	1.1	-1.1	-0.482382	0.0752596
CUS1 CDS	Expression Difference	9073135	9074445	1311	1	reverse	2.1	-2.1	-0.482242	0.00722193
SNF4 CDS	Expression Difference	4031023	4031991	969	1	forward	1.3	-1.3	-0.480233	0.0469801
RSM25 CDS	Expression Difference	5580563	5581357	795	1	reverse	2.1	-2.1	-0.480162	0.00715609
RIO1 CDS	Expression Difference	10580761	10582215	1455	1	reverse	1.2	-1.2	-0.479739	0.0666348
ERC1 CDS	Expression Difference	5003274	5005019	1746	1	forward	1.4	-1.4	-0.479602	0.0428833
MET5 CDS	Expression Difference	6511418	6515746	4329	1	reverse	1.2	-1.2	-0.479163	0.0598408
CYS4 CDS	Expression Difference	4537533	4539056	1524	1	forward	1.7	-1.7	-0.478283	0.0178541
BCS1 CDS	Expression Difference	2585188	2586558	1371	1	reverse	2.1	-2.1	-0.478261	0.007771
FOL1 CDS	Expression Difference	9412259	9414733	2475	1	forward	1.9	-1.9	-0.476388	0.0135951
ATC1 CDS	Expression Difference	2190651	2191535	885	1	reverse	1.1	-1.1	-0.476162	0.0775474
MAP1 CDS	Expression Difference	7870196	7871359	1164	1	reverse	1.5	-1.5	-0.475962	0.028696
RRP45 CDS	Expression Difference	2380769	2381686	918	1	forward	1.9	-1.9	-0.47589	0.012947
MRC1 CDS	Expression Difference	1062218	1065508	3291	1	reverse	1.5	-1.5	-0.475036	0.0350366
MED7 CDS	Expression Difference	10101345	10102013	669	1	reverse	1.2	-1.2	-0.474402	0.0619538
TRS85 CDS	Expression Difference	2031291	2033387	2097	1	forward	1.3	-1.3	-0.474016	0.0474072
CDC33 CDS	Expression Difference	10092352	10092993	642	1	reverse	1.7	-1.7	-0.473596	0.0197698
OST4 CDS	Expression Difference	1398509	1398619	111	1	forward	1.3	-1.3	-0.472837	0.0450927
EFR3 CDS	Expression Difference	9013900	9016248	2349	1	reverse	1.5	-1.5	-0.472808	0.0337575
NBP2 CDS	Expression Difference	2140412	2141122	711	1	reverse	2.2	-2.2	-0.47277	0.00643819
NPL4 CDS	Expression Difference	806562	808304	1743	1	reverse	1.7	-1.7	-0.472567	0.0212229
PRY2 CDS	Expression Difference	7042171	7043160	990	1	forward	0.9	-0.9	-0.472462	0.124323
hypothetical protein CDS	Expression Difference	4843495	4844202	708	1	forward	1.3	-1.3	-0.472241	0.0486384
TOM22 CDS	Expression Difference	9626403	9626861	459	1	forward	2.1	-2.1	-0.471785	0.00816924
TAF9 CDS	Expression Difference	9066176	9066649	474	1	forward	1.3	-1.3	-0.471671	0.0452685
KRI1 CDS	Expression Difference	9301758	9303533	1776	1	reverse	0.9	-0.9	-0.471229	0.120642
ARF1 CDS	Expression Difference	1476343	1476888	546	1	forward	1.4	-1.4	-0.470859	0.0379798
YLF2 CDS	Expression Difference	4906027	4907244	1218	1	reverse	1.7	-1.7	-0.469931	0.0200857
hypothetical protein CDS	Expression Difference	8736241	8736678	438	1	reverse	1.5	-1.5	-0.467936	0.0311632
MSE1 CDS	Expression Difference	10295444	10297054	1611	1	forward	1.4	-1.4	-0.46737	0.0429229
DPB4 CDS	Expression Difference	2053607	2054197	591	1	forward	1.7	-1.7	-0.46732	0.0188616
ALG14 CDS	Expression Difference	609439	610152	714	1	reverse	1.3	-1.3	-0.466058	0.0555163
DCC1 CDS	Expression Difference	1138023	1139165	1143	1	reverse	1.8	-1.8	-0.465885	0.0145416
CDC40 CDS	Expression Difference	2562865	2564232	1368	1	reverse	2.1	-2.1	-0.465767	0.00855828
DOC1 CDS	Expression Difference	3787603	3788355	753	1	forward	0.6	-0.6	-0.464838	0.24713
BNA7 CDS	Expression Difference	2683476	2684261	786	1	reverse	1.5	-1.5	-0.464621	0.0354291
CDA1 CDS	Expression Difference	7990648	7991553	906	1	forward	0.3	-0.3	-0.464077	0.500321
CBP3 CDS	Expression Difference	11270676	11271683	1008	1	forward	2	-2	-0.463803	0.0100019
IBD2 CDS	Expression Difference	9572901	9573956	1056	1	reverse	1.3	-1.3	-0.463388	0.0524537
EGD1 CDS	Expression Difference	11604688	11605161	474	1	reverse	1.6	-1.6	-0.462914	0.0279466
SCM4 CDS	Expression Difference	4330304	4330867	564	1	forward	1	-1	-0.461412	0.108006
DEG1 CDS	Expression Difference	3615960	3617288	1329	1	forward	1.8	-1.8	-0.461365	0.0164278
SPO20 CDS	Expression Difference	8630694	8631887	1194	1	forward	0.8	-0.8	-0.4611	0.155731
YEF3 CDS	Expression Difference	7881808	7884942	3135	1	forward	1.3	-1.3	-0.46109	0.0549942
RHR2 CDS	Expression Difference	5647688	5648440	753	1	forward	0.6	-0.6	-0.46108	0.245324
YIF1 CDS	Expression Difference	9394532	9395476	945	1	reverse	1.9	-1.9	-0.461004	0.0115856
YAP1801 CDS	Expression Difference	5250303	5252216	1914	1	reverse	2.1	-2.1	-0.460452	0.00788733
hypothetical protein CDS	Expression Difference	7474994	7475479	486	1	reverse	0.5	-0.5	-0.460032	0.349658
PUF4 CDS	Expression Difference	4205131	4207797	2667	1	forward	1.8	-1.8	-0.459875	0.0154976
SMD2 CDS	Expression Difference	7939406	7939828	333	2	forward	1	-1	-0.459851	0.0918178
gag-pol fusion protein CDS	Expression Difference	11002547	11007860	5313	2	forward	1.8	-1.8	-0.459733	0.0144405
MRPL36 CDS	Expression Difference	714188	714721	534	1	reverse	1.7	-1.7	-0.459405	0.0205084
FLX1 CDS	Expression Difference	5489968	5490903	936	1	forward	1.5	-1.5	-0.458452	0.0283595
MDM20 CDS	Expression Difference	10218993	10221383	2391	1	forward	1.9	-1.9	-0.457638	0.0140983
AIM22 CDS	Expression Difference	6184847	6186076	1230	1	forward	1.1	-1.1	-0.457605	0.0725417
SCC2 CDS	Expression Difference	2181317	2185798	4482	1	forward	2	-2	-0.457172	0.0103097
hypothetical protein CDS	Expression Difference	5008149	5010041	1893	1	forward	1.2	-1.2	-0.457133	0.0583553
DPM1 CDS	Expression Difference	12024015	12024818	804	1	forward	1.8	-1.8	-0.456885	0.0172851
FZF1 CDS	Expression Difference	3761294	3762193	900	1	forward	1.5	-1.5	-0.456565	0.033525
ROG1 CDS	Expression Difference	3971440	3973497	2058	1	reverse	1.6	-1.6	-0.456073	0.0260506
TIF1 CDS	Expression Difference	7133199	7134386	1188	1	forward	1.2	-1.2	-0.455173	0.0650149
ACF2 CDS	Expression Difference	7674705	7677044	2340	1	reverse	2.1	-2.1	-0.454909	0.00752208
YBP2 CDS	Expression Difference	4129055	4130980	1926	1	forward	1.7	-1.7	-0.454508	0.0180776
hypothetical protein CDS	Expression Difference	8882404	8883075	672	1	forward	1.1	-1.1	-0.453496	0.0791966
hypothetical protein CDS	Expression Difference	7638512	7638922	411	1	forward	1.3	-1.3	-0.453321	0.0466313
PGA3 CDS	Expression Difference	8343966	8344904	939	1	reverse	1.3	-1.3	-0.453076	0.0466321
TAE1 CDS	Expression Difference	965050	965748	699	1	reverse	1.5	-1.5	-0.452735	0.0330702
SLD5 CDS	Expression Difference	2791034	2791918	885	1	forward	1.7	-1.7	-0.452057	0.0196832
PGK1 CDS	Expression Difference	1181148	1182398	1251	1	forward	1.4	-1.4	-0.450914	0.0387162
hypothetical protein CDS	Expression Difference	6883326	6884096	771	1	forward	1.7	-1.7	-0.450642	0.0200408
TIM9 CDS	Expression Difference	3009166	3009429	264	1	forward	1.4	-1.4	-0.450625	0.0437286
TAH11 CDS	Expression Difference	6354509	6356323	1815	1	forward	1.5	-1.5	-0.450272	0.0311942
SOP4 CDS	Expression Difference	5905171	5905875	705	1	reverse	1.8	-1.8	-0.44955	0.0168268
FAP1 CDS	Expression Difference	9835899	9838796	2898	1	reverse	1.6	-1.6	-0.448879	0.0239122
NAT1 CDS	Expression Difference	1738896	1741460	2565	1	reverse	2.6	-2.6	-0.448876	0.0022954
SFB2 CDS	Expression Difference	9782917	9785547	2631	1	reverse	1.3	-1.3	-0.448619	0.0491434
ROT1 CDS	Expression Difference	8987957	8988727	771	1	forward	2.1	-2.1	-0.448326	0.0084319
MRPL11 CDS	Expression Difference	1458497	1459246	750	1	forward	1.4	-1.4	-0.448286	0.0400678
PRM2 CDS	Expression Difference	5675602	5677572	1971	1	reverse	1.7	-1.7	-0.446898	0.0219385
MET18 CDS	Expression Difference	5506379	5509477	3099	1	forward	1.9	-1.9	-0.44623	0.0124762
EFB1 CDS	Expression Difference	142174	143160	621	2	forward	1.4	-1.4	-0.445921	0.0443146
TAF3 CDS	Expression Difference	11656902	11657963	1062	1	reverse	1.6	-1.6	-0.445607	0.022851
hypothetical protein CDS	Expression Difference	7950214	7951158	945	1	forward	1.3	-1.3	-0.444368	0.0510643
ADE3 CDS	Expression Difference	4644924	4647764	2841	1	forward	1.4	-1.4	-0.444075	0.0401975
TIM21 CDS	Expression Difference	4293238	4293957	720	1	reverse	1.7	-1.7	-0.44383	0.0182799
MDM36 CDS	Expression Difference	11828114	11829853	1740	1	forward	1.9	-1.9	-0.442648	0.0134051
hypothetical protein CDS	Expression Difference	340812	341462	582	2	forward	1.2	-1.2	-0.442212	0.0616264
RAS1 CDS	Expression Difference	10547213	10548142	930	1	forward	1.4	-1.4	-0.441834	0.0383157
SQS1 CDS	Expression Difference	9472432	9474735	2304	1	reverse	1.2	-1.2	-0.441831	0.060416
MED1 CDS	Expression Difference	11809158	11810858	1701	1	forward	2.3	-2.3	-0.441512	0.00490361
EMP47 CDS	Expression Difference	3507672	3509009	1338	1	reverse	2.2	-2.2	-0.44109	0.00615473
EMC3 CDS	Expression Difference	6626406	6627167	762	1	forward	1.7	-1.7	-0.440903	0.0197326
CCZ1 CDS	Expression Difference	727381	729495	2115	1	forward	1.4	-1.4	-0.440653	0.0383269
TCM62 CDS	Expression Difference	554559	556277	1719	1	reverse	2.5	-2.5	-0.440051	0.00295524
gag-pol fusion protein CDS	Expression Difference	8186511	8191824	5313	2	forward	1.4	-1.4	-0.439824	0.039102
MID1 CDS	Expression Difference	9331805	9333451	1647	1	reverse	1	-1	-0.439464	0.0997239
REC104 CDS	Expression Difference	5242837	5243385	549	1	forward	0.6	-0.6	-0.439176	0.246504
CDC6 CDS	Expression Difference	5901799	5903340	1542	1	forward	1.4	-1.4	-0.438632	0.0379367
MRPL17 CDS	Expression Difference	9419077	9419922	846	1	reverse	1.8	-1.8	-0.438617	0.0151357
IZH4 CDS	Expression Difference	10158951	10159889	939	1	reverse	1.1	-1.1	-0.43838	0.0883251
RNA14 CDS	Expression Difference	8715960	8717993	2034	1	forward	1.9	-1.9	-0.437292	0.0112788
SRO9 CDS	Expression Difference	1100776	1102080	1305	1	reverse	0.6	-0.6	-0.43686	0.25849
hypothetical protein CDS	Expression Difference	5628297	5630333	2037	1	reverse	1.2	-1.2	-0.436527	0.060019
BIO4 CDS	Expression Difference	9980992	9981705	714	1	reverse	1.2	-1.2	-0.436177	0.0692864
hypothetical protein CDS	Expression Difference	6965774	6967117	1344	1	forward	1.5	-1.5	-0.436028	0.0324599
ADE12 CDS	Expression Difference	9482049	9483350	1302	1	forward	0.9	-0.9	-0.435836	0.129313
TPI1 CDS	Expression Difference	1915748	1916494	747	1	reverse	1	-1	-0.435628	0.0907618
GAL80 CDS	Expression Difference	8494799	8496106	1308	1	forward	2.4	-2.4	-0.435624	0.00394323
IDI1 CDS	Expression Difference	11451124	11451990	867	1	reverse	0.9	-0.9	-0.434756	0.113482
AZF1 CDS	Expression Difference	10566044	10568788	2745	1	forward	1.2	-1.2	-0.434559	0.0569013
GRS1 CDS	Expression Difference	711582	713585	2004	1	reverse	1.1	-1.1	-0.434347	0.078799
SMK1 CDS	Expression Difference	11789540	11790706	1167	1	forward	0.6	-0.6	-0.433649	0.232955
ZIP2 CDS	Expression Difference	3772088	3774202	2115	1	forward	1.5	-1.5	-0.433604	0.029481
ERG27 CDS	Expression Difference	7586838	7587881	1044	1	forward	1.2	-1.2	-0.433551	0.0679192
SSQ1 CDS	Expression Difference	8104580	8106553	1974	1	forward	1.4	-1.4	-0.433351	0.0397795
SUS1 CDS	Expression Difference	692357	692797	291	3	forward	2.2	-2.2	-0.433225	0.0069649
UBS1 CDS	Expression Difference	799070	799903	834	1	forward	2	-2	-0.43273	0.009471
hypothetical protein CDS	Expression Difference	3448251	3450635	2385	1	reverse	0.9	-0.9	-0.432721	0.120685
ZRT2 CDS	Expression Difference	7647822	7649090	1269	1	reverse	2.3	-2.3	-0.432578	0.00522804
ALG13 CDS	Expression Difference	4150542	4151150	609	1	forward	0.9	-0.9	-0.43212	0.136447
COX18 CDS	Expression Difference	4355318	4356268	951	1	reverse	1.1	-1.1	-0.431177	0.0863451
RKM4 CDS	Expression Difference	2330012	2331496	1485	1	reverse	1	-1	-0.430806	0.0966507
RPC31 CDS	Expression Difference	9595402	9596157	756	1	reverse	1.4	-1.4	-0.428425	0.035603
YAP6 CDS	Expression Difference	2334653	2335804	1152	1	reverse	0.7	-0.7	-0.427541	0.178525
PNT1 CDS	Expression Difference	10852992	10854263	1272	1	forward	1.1	-1.1	-0.426745	0.0763793
SRB5 CDS	Expression Difference	4436435	4437358	924	1	reverse	0.9	-0.9	-0.426347	0.116328
PMT4 CDS	Expression Difference	6530787	6533075	2289	1	reverse	1.3	-1.3	-0.425884	0.0538493
hypothetical protein CDS	Expression Difference	3219574	3220095	522	1	reverse	0.5	-0.5	-0.425753	0.319269
MSH6 CDS	Expression Difference	2000131	2003859	3729	1	reverse	1.3	-1.3	-0.425622	0.0542394
SPT20 CDS	Expression Difference	10077729	10079543	1815	1	reverse	1.7	-1.7	-0.424975	0.0194211
hypothetical protein CDS	Expression Difference	11956949	11957505	423	2	forward	0.7	-0.7	-0.424289	0.206231
MTR2 CDS	Expression Difference	6670956	6671510	555	1	reverse	2.2	-2.2	-0.424272	0.00661999
SMD1 CDS	Expression Difference	4374702	4375142	441	1	forward	1.2	-1.2	-0.424209	0.0642809
RET3 CDS	Expression Difference	11658278	11658847	570	1	forward	0.9	-0.9	-0.424144	0.119933
INM1 CDS	Expression Difference	5027328	5028215	888	1	reverse	0.8	-0.8	-0.424043	0.159143
hypothetical protein CDS	Expression Difference	3748152	3748385	234	1	forward	0.6	-0.6	-0.42386	0.230213
UTP7 CDS	Expression Difference	3216227	3217891	1665	1	reverse	1.1	-1.1	-0.423113	0.0788398
SPT6 CDS	Expression Difference	4459399	4463754	4356	1	forward	1.8	-1.8	-0.42288	0.0174067
hypothetical protein CDS	Expression Difference	4260080	4261066	987	1	reverse	1.3	-1.3	-0.422821	0.0479472
DET1 CDS	Expression Difference	1917078	1918082	1005	1	reverse	1.1	-1.1	-0.422411	0.0746443
UTP9 CDS	Expression Difference	5321861	5323588	1728	1	forward	0.9	-0.9	-0.42235	0.140066
GAL1 CDS	Expression Difference	509239	510825	1587	1	forward	1.6	-1.6	-0.422315	0.0278622
DLS1 CDS	Expression Difference	6147515	6148018	504	1	reverse	1.8	-1.8	-0.421329	0.0173929
HUT1 CDS	Expression Difference	11210274	11211293	1020	1	reverse	1	-1	-0.421164	0.0924758
CDC7 CDS	Expression Difference	1784231	1785754	1524	1	forward	1.2	-1.2	-0.420691	0.0651328
COS10 CDS	Expression Difference	10027552	10028676	1125	1	forward	0.9	-0.9	-0.420106	0.11682
hypothetical protein CDS	Expression Difference	3471859	3472167	309	1	reverse	0.3	-0.3	-0.419823	0.53144
hypothetical protein CDS	Expression Difference	10164694	10167807	3114	1	reverse	1.2	-1.2	-0.419746	0.0700646
SNN1 CDS	Expression Difference	9713970	9714278	309	1	forward	1	-1	-0.419515	0.11043
HIR2 CDS	Expression Difference	10434730	10437357	2628	1	reverse	1.7	-1.7	-0.419335	0.0203097
LSM12 CDS	Expression Difference	5182686	5183249	564	1	forward	1	-1	-0.418652	0.100533
hypothetical protein CDS	Expression Difference	5581639	5583540	1902	1	forward	1.4	-1.4	-0.418629	0.0424647
HXT13 CDS	Expression Difference	2913492	2915186	1695	1	reverse	0.5	-0.5	-0.418624	0.310416
DPH6 CDS	Expression Difference	7672357	7674414	2058	1	forward	0.9	-0.9	-0.418217	0.119386
MGM101 CDS	Expression Difference	6533343	6534152	810	1	forward	1.9	-1.9	-0.417991	0.0119093
AGP3 CDS	Expression Difference	3485833	3487509	1677	1	forward	0.7	-0.7	-0.417573	0.183055
CDC8 CDS	Expression Difference	6376523	6377173	651	1	forward	1.2	-1.2	-0.417549	0.0674265
TYW3 CDS	Expression Difference	4144766	4145587	822	1	forward	0.7	-0.7	-0.417544	0.203413
TIM50 CDS	Expression Difference	11553199	11554629	1431	1	forward	1.6	-1.6	-0.417388	0.0266077
hypothetical protein CDS	Expression Difference	6971933	6972766	834	1	forward	1.6	-1.6	-0.417335	0.0262572
hypothetical protein CDS	Expression Difference	232800	233117	318	1	reverse	0.3	-0.3	-0.417319	0.47666
HDA2 CDS	Expression Difference	2412645	2414669	2025	1	reverse	1.6	-1.6	-0.417149	0.0235777
CSR1 CDS	Expression Difference	8123310	8124536	1227	1	forward	1.1	-1.1	-0.416802	0.0833099
hypothetical protein CDS	Expression Difference	9991996	9992979	984	1	reverse	0.8	-0.8	-0.416635	0.166565
PPA2 CDS	Expression Difference	9124977	9125909	933	1	forward	1.3	-1.3	-0.416257	0.0519152
SGO1 CDS	Expression Difference	10496740	10498512	1773	1	forward	0.8	-0.8	-0.415928	0.16922
HDA1 CDS	Expression Difference	9840863	9842983	2121	1	forward	1.1	-1.1	-0.415029	0.07436
GIM4 CDS	Expression Difference	3040131	3040554	336	2	forward	1	-1	-0.414399	0.109421
SEC2 CDS	Expression Difference	9374441	9376720	2280	1	reverse	1	-1	-0.413712	0.0906762
hypothetical protein CDS	Expression Difference	6769891	6771282	1392	1	reverse	0.8	-0.8	-0.413544	0.177383
hypothetical protein CDS	Expression Difference	844744	844848	105	1	reverse	0.7	-0.7	-0.413062	0.208192
TOM71 CDS	Expression Difference	5172279	5174198	1920	1	forward	1.9	-1.9	-0.413059	0.0118246
hypothetical protein CDS	Expression Difference	8310984	8311592	609	1	forward	0.6	-0.6	-0.412962	0.269879
NSE4 CDS	Expression Difference	1632411	1633619	1209	1	forward	0.9	-0.9	-0.412372	0.138487
YPQ1 CDS	Expression Difference	10176173	10177099	927	1	forward	0.9	-0.9	-0.411844	0.117604
THG1 CDS	Expression Difference	4270873	4271586	714	1	reverse	1.3	-1.3	-0.41144	0.0550629
ECM7 CDS	Expression Difference	8267653	8268999	1347	1	forward	1.5	-1.5	-0.411335	0.0286681
SPC1 CDS	Expression Difference	6290538	6290822	285	1	reverse	1.2	-1.2	-0.411058	0.0696094
RPC25 CDS	Expression Difference	6754055	6754693	639	1	reverse	1.2	-1.2	-0.410913	0.0627482
LOC1 CDS	Expression Difference	3617939	3618553	615	1	forward	0.8	-0.8	-0.41088	0.162344
GEP3 CDS	Expression Difference	10757533	10759203	1671	1	reverse	1.5	-1.5	-0.41005	0.031889
MMT2 CDS	Expression Difference	11249894	11251348	1455	1	reverse	1.3	-1.3	-0.409535	0.0557572
hypothetical protein CDS	Expression Difference	4096367	4097329	963	1	forward	0.5	-0.5	-0.409321	0.307236
YRM1 CDS	Expression Difference	10686179	10688539	2361	1	forward	1.9	-1.9	-0.407949	0.012469
AFG2 CDS	Expression Difference	8157578	8159920	2343	1	reverse	1.2	-1.2	-0.40755	0.0595891
RTC6 CDS	Expression Difference	11322355	11322636	282	1	forward	0.8	-0.8	-0.406959	0.154029
MCM4 CDS	Expression Difference	11720010	11722811	2802	1	forward	2.1	-2.1	-0.406891	0.0072275
hypothetical protein CDS	Expression Difference	10036099	10036281	183	1	forward	0.5	-0.5	-0.406446	0.337535
SWM2 CDS	Expression Difference	9883579	9884019	441	1	forward	1.1	-1.1	-0.405886	0.0822033
TAN1 CDS	Expression Difference	3801065	3801992	870	2	forward	0.9	-0.9	-0.405722	0.116349
MNL2 CDS	Expression Difference	7500334	7502883	2550	1	forward	1.2	-1.2	-0.405453	0.068398
glucose-6-phosphate 1-epimerase CDS	Expression Difference	8787139	8788032	894	1	reverse	1.3	-1.3	-0.405071	0.0536296
MGE1 CDS	Expression Difference	10806542	10807228	687	1	forward	1.6	-1.6	-0.404513	0.025377
PEX21 CDS	Expression Difference	4708177	4709043	867	1	reverse	1	-1	-0.403933	0.0935706
KIN2 CDS	Expression Difference	7577618	7581061	3444	1	forward	1.6	-1.6	-0.403813	0.0255677
hypothetical protein CDS	Expression Difference	4335683	4337611	1929	1	forward	1	-1	-0.403497	0.108872
RER2 CDS	Expression Difference	471926	472786	861	1	reverse	1.5	-1.5	-0.403017	0.0308997
JIP5 CDS	Expression Difference	12001950	12003428	1479	1	forward	1.9	-1.9	-0.402584	0.0113489
ACS1 CDS	Expression Difference	42881	45022	2142	1	reverse	0.5	-0.5	-0.402186	0.284261
hypothetical protein CDS	Expression Difference	1606711	1607634	924	1	reverse	1.8	-1.8	-0.402077	0.0165836
GPI1 CDS	Expression Difference	4661623	4663452	1830	1	reverse	1	-1	-0.401358	0.102437
MEP1 CDS	Expression Difference	4470439	4471917	1479	1	reverse	0.8	-0.8	-0.400973	0.152217
NMA2 CDS	Expression Difference	4250535	4251722	1188	1	forward	1.2	-1.2	-0.400238	0.0661104
NOP53 CDS	Expression Difference	11399422	11400789	1368	1	reverse	0.9	-0.9	-0.400042	0.120787
gag-pol fusion protein CDS	Expression Difference	260153	265466	5313	2	forward	1.1	-1.1	-0.399578	0.0712157
aldose 1-epimerase superfamily protein CDS	Expression Difference	10018076	10019104	1029	1	reverse	0.4	-0.4	-0.399257	0.356402
SVF1 CDS	Expression Difference	2527236	2528681	1446	1	reverse	1.4	-1.4	-0.3991	0.0376744
DSS1 CDS	Expression Difference	9165641	9168550	2910	1	reverse	1.5	-1.5	-0.39903	0.0325294
RDR1 CDS	Expression Difference	11083259	11084899	1641	1	forward	1.9	-1.9	-0.398692	0.0114896
PRP16 CDS	Expression Difference	7178069	7181284	3216	1	forward	1.5	-1.5	-0.397985	0.0316334
PHO88 CDS	Expression Difference	682876	683442	567	1	forward	0.9	-0.9	-0.397012	0.118029
POF1 CDS	Expression Difference	1087063	1087839	777	1	reverse	1.4	-1.4	-0.396647	0.0405296
ASF1 CDS	Expression Difference	6028748	6029587	840	1	forward	0.9	-0.9	-0.39654	0.116316
TNA1 CDS	Expression Difference	4751475	4753079	1605	1	forward	1	-1	-0.396505	0.09267
HBS1 CDS	Expression Difference	7175267	7177102	1836	1	reverse	1.1	-1.1	-0.396367	0.0883284
PDR3 CDS	Expression Difference	447688	450618	2931	1	forward	1	-1	-0.39612	0.0904507
FAP7 CDS	Expression Difference	1523471	1524064	594	1	reverse	0.9	-0.9	-0.395821	0.138478
COQ8 CDS	Expression Difference	4023432	4024937	1506	1	forward	2.1	-2.1	-0.395296	0.00818796
NCS2 CDS	Expression Difference	9648676	9650157	1482	1	forward	0.6	-0.6	-0.394672	0.23294
hypothetical protein CDS	Expression Difference	5025481	5027163	1683	1	forward	1	-1	-0.394453	0.112064
SWT1 CDS	Expression Difference	10679095	10680471	1377	1	reverse	1	-1	-0.394346	0.0990933
POA1 CDS	Expression Difference	513956	514489	534	1	forward	1.5	-1.5	-0.393906	0.0313854
PAC10 CDS	Expression Difference	4378762	4379361	600	1	reverse	1.7	-1.7	-0.393563	0.0195495
FOL3 CDS	Expression Difference	8818204	8819487	1284	1	forward	1.4	-1.4	-0.393256	0.0361103
RIB2 CDS	Expression Difference	10234665	10236440	1776	1	reverse	0.9	-0.9	-0.392642	0.135323
hypothetical protein CDS	Expression Difference	3453660	3454580	921	1	reverse	1.2	-1.2	-0.392535	0.0622383
CGI121 CDS	Expression Difference	8528847	8529498	546	2	forward	0.8	-0.8	-0.391669	0.142359
YAF9 CDS	Expression Difference	9667734	9668414	681	1	forward	1.2	-1.2	-0.391266	0.0691471
ZIM17 CDS	Expression Difference	9299543	9300067	525	1	reverse	1.6	-1.6	-0.391068	0.0239297
ARV1 CDS	Expression Difference	7867946	7868911	966	1	reverse	1.1	-1.1	-0.390905	0.0837008
TRS33 CDS	Expression Difference	10570628	10571434	807	1	reverse	1	-1	-0.390808	0.10102
OAF3 CDS	Expression Difference	7140759	7143350	2592	1	forward	1.5	-1.5	-0.390669	0.0323797
IMP1 CDS	Expression Difference	8885161	8885733	573	1	reverse	1.2	-1.2	-0.390223	0.0631288
PRM5 CDS	Expression Difference	5533186	5534142	957	1	reverse	0.5	-0.5	-0.390108	0.326254
KAP123 CDS	Expression Difference	3270717	3274058	3342	1	reverse	0.7	-0.7	-0.389826	0.218922
CIA1 CDS	Expression Difference	2362532	2363524	993	1	reverse	0.9	-0.9	-0.38959	0.126013
BFA1 CDS	Expression Difference	6366488	6368212	1725	1	forward	0.8	-0.8	-0.389147	0.16347
MMF1 CDS	Expression Difference	5650416	5650853	438	1	reverse	1.1	-1.1	-0.38787	0.0744553
MTC6 CDS	Expression Difference	5229198	5230778	1581	1	reverse	1.1	-1.1	-0.387773	0.0828611
AQY2 CDS	Expression Difference	7280940	7281389	450	1	reverse	0.5	-0.5	-0.387547	0.292323
ACB1 CDS	Expression Difference	4298721	4298984	264	1	reverse	1.8	-1.8	-0.387299	0.016222
MTG2 CDS	Expression Difference	5270307	5271863	1557	1	forward	0.9	-0.9	-0.38671	0.12913
SEC28 CDS	Expression Difference	5609231	5610121	891	1	forward	1	-1	-0.386636	0.0904231
UTP5 CDS	Expression Difference	2627493	2629424	1932	1	forward	0.7	-0.7	-0.386364	0.216576
TIM54 CDS	Expression Difference	6166726	6168162	1437	1	forward	1.7	-1.7	-0.385618	0.0179785
PRS5 CDS	Expression Difference	10244213	10245703	1491	1	forward	1.5	-1.5	-0.385384	0.0346814
TSC3 CDS	Expression Difference	586542	586784	243	1	reverse	1	-1	-0.385185	0.0983953
KAP120 CDS	Expression Difference	11436648	11439746	3099	1	forward	1.3	-1.3	-0.385126	0.0485003
NUP2 CDS	Expression Difference	8042458	8044620	2163	1	forward	1.2	-1.2	-0.384963	0.0654472
TPT1 CDS	Expression Difference	10157966	10158658	693	1	reverse	1	-1	-0.384798	0.0970822
IOC3 CDS	Expression Difference	3638751	3641114	2364	1	forward	1.5	-1.5	-0.384514	0.0306538
BSC1 CDS	Expression Difference	1744623	1745609	987	1	reverse	0.3	-0.3	-0.384201	0.504971
MED8 CDS	Expression Difference	839300	839971	672	1	reverse	1.2	-1.2	-0.383243	0.0581368
CEX1 CDS	Expression Difference	10563477	10565762	2286	1	forward	1.2	-1.2	-0.383015	0.0574532
NOP12 CDS	Expression Difference	10283236	10284615	1380	1	reverse	0.7	-0.7	-0.383007	0.215801
MGR3 CDS	Expression Difference	8820909	8822414	1506	1	forward	1.4	-1.4	-0.382787	0.0435403
UNG1 CDS	Expression Difference	8552939	8554018	1080	1	reverse	0.9	-0.9	-0.382654	0.121611
RAD26 CDS	Expression Difference	6329816	6333073	3258	1	forward	1.6	-1.6	-0.381381	0.0232069
MTF1 CDS	Expression Difference	9047831	9048856	1026	1	forward	1.4	-1.4	-0.381069	0.0388253
COX17 CDS	Expression Difference	7376233	7376442	210	1	reverse	1.8	-1.8	-0.380971	0.0171551
hypothetical protein CDS	Expression Difference	6192591	6193364	774	1	forward	0.3	-0.3	-0.380647	0.449773
AIM5 CDS	Expression Difference	965938	966258	321	1	reverse	1.1	-1.1	-0.379942	0.0811973
ART5 CDS	Expression Difference	4364314	4366074	1761	1	reverse	0.5	-0.5	-0.379822	0.295073
BIT61 CDS	Expression Difference	6158703	6160334	1632	1	reverse	1.5	-1.5	-0.379798	0.034335
INO1 CDS	Expression Difference	5966793	5968394	1602	1	reverse	0.2	-0.2	-0.378915	0.575041
NKP2 CDS	Expression Difference	8009836	8010297	462	1	forward	0.7	-0.7	-0.378705	0.188817
SER3 CDS	Expression Difference	3214641	3216050	1410	1	forward	0.8	-0.8	-0.37842	0.156865
SKP1 CDS	Expression Difference	2485456	2486040	585	1	reverse	1.4	-1.4	-0.378353	0.0418574
HIF1 CDS	Expression Difference	7344072	7345229	1158	1	reverse	1	-1	-0.378241	0.0931114
SPS19 CDS	Expression Difference	9507214	9508092	879	1	forward	0.4	-0.4	-0.378004	0.368741
hypothetical protein CDS	Expression Difference	5086290	5087948	1659	1	forward	1.4	-1.4	-0.377459	0.0363344
SLK19 CDS	Expression Difference	10744835	10747300	2466	1	forward	0.9	-0.9	-0.3769	0.130662
AIM43 CDS	Expression Difference	11486780	11487328	549	1	reverse	1.3	-1.3	-0.376728	0.0504466
FMN1 CDS	Expression Difference	2295258	2295914	657	1	reverse	1.4	-1.4	-0.376699	0.0440691
ANP1 CDS	Expression Difference	2975005	2976507	1503	1	reverse	1.4	-1.4	-0.375856	0.0406784
HOM6 CDS	Expression Difference	6521906	6522985	1080	1	reverse	1.3	-1.3	-0.37496	0.0527839
hypothetical protein CDS	Expression Difference	258645	258764	120	1	forward	0.3	-0.3	-0.374941	0.550754
TUF1 CDS	Expression Difference	10715999	10717312	1314	1	forward	1.7	-1.7	-0.374686	0.0210359
TIM10 CDS	Expression Difference	4945550	4945831	282	1	reverse	1.3	-1.3	-0.373571	0.0474391
BNA5 CDS	Expression Difference	7850786	7852147	1362	1	reverse	1.2	-1.2	-0.373012	0.0679974
TAD2 CDS	Expression Difference	6212710	6213462	753	1	reverse	0.8	-0.8	-0.372344	0.155504
TDH2 CDS	Expression Difference	6286144	6287142	999	1	reverse	0.8	-0.8	-0.37234	0.166342
ATX1 CDS	Expression Difference	9405280	9405501	222	1	reverse	0.5	-0.5	-0.372192	0.327763
hypothetical protein CDS	Expression Difference	1345884	1346432	549	1	reverse	0.7	-0.7	-0.372133	0.2167
NPY1 CDS	Expression Difference	4115091	4116245	1155	1	forward	1.3	-1.3	-0.371933	0.0451954
RRT2 CDS	Expression Difference	941809	942972	1164	1	forward	1.3	-1.3	-0.37188	0.0476598
SHM2 CDS	Expression Difference	7503020	7504429	1410	1	reverse	0.7	-0.7	-0.371739	0.186137
SHE2 CDS	Expression Difference	6773500	6774240	741	1	reverse	0.9	-0.9	-0.371371	0.130847
SEC66 CDS	Expression Difference	808582	809202	621	1	forward	1.1	-1.1	-0.370599	0.0831269
COG2 CDS	Expression Difference	4469023	4469811	789	1	reverse	1.4	-1.4	-0.369942	0.0408855
RFC1 CDS	Expression Difference	10781270	10783855	2586	1	forward	1.2	-1.2	-0.369567	0.069109
RAD27 CDS	Expression Difference	6802939	6804087	1149	1	reverse	1.2	-1.2	-0.369524	0.0639083
ERP1 CDS	Expression Difference	154065	154724	660	1	reverse	0.8	-0.8	-0.367907	0.148081
NTC20 CDS	Expression Difference	833903	834325	423	1	reverse	1	-1	-0.366962	0.0933363
GYP6 CDS	Expression Difference	6190761	6192137	1377	1	reverse	1.8	-1.8	-0.36672	0.0159662
DOT1 CDS	Expression Difference	2702515	2704263	1749	1	forward	1.5	-1.5	-0.366582	0.0320658
hypothetical protein CDS	Expression Difference	11743685	11744518	834	1	reverse	0.7	-0.7	-0.366565	0.21284
HRT1 CDS	Expression Difference	10102294	10102659	366	1	forward	1.9	-1.9	-0.366247	0.011287
HOS2 CDS	Expression Difference	3879358	3880716	1359	1	reverse	0.9	-0.9	-0.365714	0.117036
ATG2 CDS	Expression Difference	9438960	9443738	4779	1	forward	1.1	-1.1	-0.36536	0.0855691
SWD2 CDS	Expression Difference	6982314	6983303	990	1	forward	1.6	-1.6	-0.365269	0.0236955
hypothetical protein CDS	Expression Difference	1686635	1689589	2955	1	forward	0.9	-0.9	-0.364999	0.114574
hypothetical protein CDS	Expression Difference	4224413	4224523	111	1	forward	0.2	-0.2	-0.364142	0.567207
YMD8 CDS	Expression Difference	8525980	8527308	1329	1	reverse	0.8	-0.8	-0.36404	0.142141
TAF11 CDS	Expression Difference	8565194	8566234	1041	1	reverse	1.3	-1.3	-0.363764	0.0519158
PRI1 CDS	Expression Difference	5765650	5766879	1230	1	reverse	1.2	-1.2	-0.363546	0.0665258
RKR1 CDS	Expression Difference	9086556	9091244	4689	1	reverse	0.8	-0.8	-0.363447	0.146456
hypothetical protein CDS	Expression Difference	4361362	4363776	2415	1	reverse	0.2	-0.2	-0.363325	0.564711
PRP9 CDS	Expression Difference	1757559	1759151	1593	1	forward	1.4	-1.4	-0.363319	0.0402038
PUS9 CDS	Expression Difference	1747535	1748923	1389	1	reverse	1.1	-1.1	-0.363194	0.0771474
NUP1 CDS	Expression Difference	10539917	10543147	3231	1	reverse	0.7	-0.7	-0.362882	0.202099
HEM14 CDS	Expression Difference	3074555	3076174	1620	1	forward	0.9	-0.9	-0.362511	0.130075
SEC20 CDS	Expression Difference	2805865	2807016	1152	1	reverse	1.3	-1.3	-0.362447	0.0525314
SUI2 CDS	Expression Difference	6283481	6284395	915	1	forward	1.2	-1.2	-0.36208	0.0589147
JLP2 CDS	Expression Difference	8858149	8858775	627	1	reverse	0.6	-0.6	-0.361917	0.278071
PHO87 CDS	Expression Difference	1237816	1240587	2772	1	reverse	1.6	-1.6	-0.361868	0.0236131
MDL1 CDS	Expression Difference	7773328	7775415	2088	1	forward	1.3	-1.3	-0.361729	0.0541951
hypothetical protein CDS	Expression Difference	3000459	3002507	2049	1	reverse	1.3	-1.3	-0.361038	0.0493224
YFH1 CDS	Expression Difference	1605945	1606469	525	1	forward	1.1	-1.1	-0.360684	0.0879731
GCN4 CDS	Expression Difference	3030873	3031718	846	1	reverse	0.9	-0.9	-0.360343	0.130246
SMY1 CDS	Expression Difference	6864815	6866785	1971	1	forward	1.4	-1.4	-0.360129	0.0421011
hypothetical protein CDS	Expression Difference	7713855	7713986	132	1	reverse	0.3	-0.3	-0.359557	0.547082
ATP11 CDS	Expression Difference	9290960	9291916	957	1	reverse	1.8	-1.8	-0.359308	0.0158933
NSE5 CDS	Expression Difference	8550199	8551869	1671	1	reverse	1.3	-1.3	-0.359031	0.0504241
MCH4 CDS	Expression Difference	10126825	10128330	1506	1	reverse	0.6	-0.6	-0.358701	0.258613
CST26 CDS	Expression Difference	550634	551827	1194	1	reverse	1.3	-1.3	-0.358526	0.050873
hypothetical protein CDS	Expression Difference	2318703	2319824	1122	1	reverse	1	-1	-0.358324	0.111856
FLO8 CDS	Expression Difference	3267170	3269569	2400	1	reverse	1.3	-1.3	-0.358235	0.04657
KEI1 CDS	Expression Difference	2572870	2573636	666	2	forward	1.5	-1.5	-0.357519	0.0302772
LSM6 CDS	Expression Difference	2589371	2589631	261	1	reverse	0.9	-0.9	-0.357356	0.116159
DBP5 CDS	Expression Difference	10446428	10447876	1449	1	reverse	1.2	-1.2	-0.355993	0.0684702
YTP1 CDS	Expression Difference	9452824	9454203	1380	1	forward	0.5	-0.5	-0.355704	0.323796
MCM5 CDS	Expression Difference	7936583	7938910	2328	1	forward	1.2	-1.2	-0.355239	0.0702869
RTK1 CDS	Expression Difference	1765366	1767228	1863	1	reverse	0.9	-0.9	-0.353721	0.117409
COF1 CDS	Expression Difference	7284832	7285442	432	2	reverse	1.3	-1.3	-0.35319	0.0452533
SAR1 CDS	Expression Difference	11261958	11262669	573	2	forward	1	-1	-0.35307	0.0899094
NTF2 CDS	Expression Difference	3064070	3064447	378	1	forward	0.9	-0.9	-0.352943	0.136556
YEA4 CDS	Expression Difference	3038906	3039934	1029	1	forward	0.9	-0.9	-0.352052	0.131378
PHO86 CDS	Expression Difference	6024992	6025927	936	1	forward	1.8	-1.8	-0.351578	0.0171326
hypothetical protein CDS	Expression Difference	1439316	1440434	1119	1	reverse	0.4	-0.4	-0.350066	0.357172
REX3 CDS	Expression Difference	7609144	7610358	1215	1	forward	1	-1	-0.349684	0.101979
ABD1 CDS	Expression Difference	920601	921911	1311	1	reverse	1.2	-1.2	-0.349441	0.0630611
hypothetical protein CDS	Expression Difference	7151786	7152844	1059	1	forward	1.3	-1.3	-0.348749	0.0512714
hypothetical protein CDS	Expression Difference	10388512	10388925	414	1	forward	1	-1	-0.348161	0.0967077
RKM1 CDS	Expression Difference	11281102	11282853	1752	1	forward	0.8	-0.8	-0.347409	0.172244
CCT8 CDS	Expression Difference	6252418	6254124	1707	1	reverse	1	-1	-0.346665	0.0905278
HLJ1 CDS	Expression Difference	8900923	8901597	675	1	forward	1	-1	-0.346169	0.0992037
PEX12 CDS	Expression Difference	8647441	8648640	1200	1	reverse	1.2	-1.2	-0.346038	0.0593171
RTT109 CDS	Expression Difference	7391319	7392629	1311	1	forward	1	-1	-0.344807	0.0967671
hypothetical protein CDS	Expression Difference	3878709	3878951	243	1	reverse	0.7	-0.7	-0.344773	0.18247
MTF2 CDS	Expression Difference	1733989	1735311	1323	1	reverse	1.3	-1.3	-0.344194	0.0497937
DAD4 CDS	Expression Difference	2468302	2468520	219	1	reverse	0.8	-0.8	-0.343757	0.163662
RFC3 CDS	Expression Difference	9333854	9334876	1023	1	forward	0.9	-0.9	-0.343629	0.116176
EBS1 CDS	Expression Difference	2222076	2224730	2655	1	forward	1.3	-1.3	-0.343409	0.0530456
MNN11 CDS	Expression Difference	5916529	5917797	1269	1	forward	1	-1	-0.343226	0.106888
APS3 CDS	Expression Difference	6228392	6229053	585	2	reverse	0.7	-0.7	-0.343087	0.183245
PRP6 CDS	Expression Difference	574820	577519	2700	1	reverse	1	-1	-0.342148	0.0971203
SCP160 CDS	Expression Difference	6118019	6121687	3669	1	reverse	1.6	-1.6	-0.342005	0.0272268
BCP1 CDS	Expression Difference	2555434	2556285	852	1	reverse	0.7	-0.7	-0.341919	0.196691
SLD3 CDS	Expression Difference	4034922	4036928	2007	1	forward	1	-1	-0.340946	0.108295
GLE2 CDS	Expression Difference	3265403	3266500	1098	1	reverse	1.1	-1.1	-0.340295	0.0719852
RSE1 CDS	Expression Difference	8497425	8501510	4086	1	reverse	1.5	-1.5	-0.339896	0.031958
YPS3 CDS	Expression Difference	7633772	7635298	1527	1	reverse	0.9	-0.9	-0.339882	0.118812
GCN20 CDS	Expression Difference	3631317	3633575	2259	1	forward	1.2	-1.2	-0.339582	0.0703588
GPT2 CDS	Expression Difference	7146130	7148361	2232	1	forward	0.4	-0.4	-0.339421	0.394407
YIG1 CDS	Expression Difference	11293030	11294415	1386	1	reverse	0.4	-0.4	-0.338924	0.362285
YLH47 CDS	Expression Difference	11911221	11912585	1365	1	forward	1.5	-1.5	-0.338667	0.0341777
MDM10 CDS	Expression Difference	134184	135665	1482	1	reverse	1.5	-1.5	-0.338366	0.0307185
YHK8 CDS	Expression Difference	5034537	5036081	1545	1	forward	1	-1	-0.337893	0.102966
KCC4 CDS	Expression Difference	1122564	1125677	3114	1	forward	0.9	-0.9	-0.337657	0.129309
YUR1 CDS	Expression Difference	5984174	5985460	1287	1	reverse	1	-1	-0.337633	0.10053
YSF3 CDS	Expression Difference	9613669	9614048	258	2	forward	0.8	-0.8	-0.337342	0.145753
MET16 CDS	Expression Difference	12000107	12000892	786	1	reverse	0.6	-0.6	-0.336975	0.239214
MCM16 CDS	Expression Difference	11780059	11780604	546	1	forward	0.6	-0.6	-0.336863	0.251895
4a-hydroxytetrahydrobiopterin dehydratase CDS	Expression Difference	4899638	4900000	363	1	forward	0.3	-0.3	-0.336781	0.532551
putative metalloendopeptidase CDS	Expression Difference	5553460	5555550	2091	1	forward	1	-1	-0.33618	0.0960367
YCH1 CDS	Expression Difference	4644227	4644673	447	1	forward	1.3	-1.3	-0.336138	0.0550334
STN1 CDS	Expression Difference	1970463	1971947	1485	1	forward	0.8	-0.8	-0.335501	0.177124
SSY5 CDS	Expression Difference	5959314	5961413	2100	1	reverse	1.2	-1.2	-0.335234	0.0659495
TSR4 CDS	Expression Difference	10312241	10313467	1227	1	reverse	0.5	-0.5	-0.334983	0.292882
SEC53 CDS	Expression Difference	3512457	3513221	765	1	reverse	0.7	-0.7	-0.334548	0.218725
MEX67 CDS	Expression Difference	11352299	11354098	1800	1	reverse	0.9	-0.9	-0.334542	0.124919
NNT1 CDS	Expression Difference	7952388	7953173	786	1	forward	1	-1	-0.334467	0.0988075
PTC4 CDS	Expression Difference	717417	718598	1182	1	reverse	1.4	-1.4	-0.334202	0.0391204
MRPL28 CDS	Expression Difference	2746095	2746538	444	1	forward	1	-1	-0.333592	0.105375
RSM18 CDS	Expression Difference	3145926	3146342	417	1	reverse	1.5	-1.5	-0.333331	0.0315249
IOC2 CDS	Expression Difference	7574705	7577143	2439	1	reverse	0.9	-0.9	-0.33315	0.141011
EUG1 CDS	Expression Difference	2838630	2840183	1554	1	forward	1.3	-1.3	-0.333136	0.0531335
TIF2 CDS	Expression Difference	5985965	5987152	1188	1	reverse	0.9	-0.9	-0.333063	0.119031
hypothetical protein CDS	Expression Difference	3887814	3887954	141	1	reverse	0.3	-0.3	-0.333024	0.462001
SMF1 CDS	Expression Difference	10121661	10123388	1728	1	reverse	1.1	-1.1	-0.332393	0.0710985
hypothetical protein CDS	Expression Difference	11387862	11387960	99	1	forward	0.2	-0.2	-0.331448	0.629888
YPS6 CDS	Expression Difference	5823071	5824684	1614	1	reverse	0.7	-0.7	-0.3314	0.222137
KXD1 CDS	Expression Difference	4098434	4099090	657	1	forward	1	-1	-0.331317	0.110599
PRP39 CDS	Expression Difference	8504679	8506568	1890	1	forward	0.8	-0.8	-0.33131	0.169137
SPP381 CDS	Expression Difference	776594	777469	876	1	forward	0.5	-0.5	-0.330728	0.284132
SHU1 CDS	Expression Difference	4928273	4928725	453	1	reverse	0.9	-0.9	-0.330543	0.127367
ECM15 CDS	Expression Difference	467371	467685	315	1	reverse	0.8	-0.8	-0.329471	0.177682
CIN2 CDS	Expression Difference	11218632	11219518	807	2	reverse	0.8	-0.8	-0.329446	0.174029
EGD2 CDS	Expression Difference	5317642	5318166	525	1	reverse	0.8	-0.8	-0.329396	0.143451
ERG11 CDS	Expression Difference	4950021	4951613	1593	1	reverse	0.8	-0.8	-0.329349	0.15747
CAB4 CDS	Expression Difference	4784634	4785551	918	1	reverse	1.1	-1.1	-0.329133	0.073981
TRM2 CDS	Expression Difference	7127660	7129579	1920	1	forward	0.6	-0.6	-0.328975	0.261253
COG1 CDS	Expression Difference	3818102	3819355	1254	1	reverse	0.8	-0.8	-0.328632	0.166146
hypothetical protein CDS	Expression Difference	1154210	1155077	792	2	reverse	0.7	-0.7	-0.327952	0.203759
SAS4 CDS	Expression Difference	2185932	2187377	1446	1	reverse	1	-1	-0.327781	0.0946192
SEC14 CDS	Expression Difference	8748194	8749264	915	2	forward	1	-1	-0.327454	0.0967342
hypothetical protein CDS	Expression Difference	8941684	8942508	825	1	forward	0.9	-0.9	-0.327315	0.13142
hypothetical protein CDS	Expression Difference	7949521	7949988	468	1	reverse	0.6	-0.6	-0.327065	0.230457
RPN9 CDS	Expression Difference	2682227	2683408	1182	1	forward	0.9	-0.9	-0.326582	0.118946
POL3 CDS	Expression Difference	1636894	1640187	3294	1	forward	1	-1	-0.325519	0.0940169
hypothetical protein CDS	Expression Difference	10168189	10168374	186	1	forward	0.4	-0.4	-0.32547	0.356641
PSP2 CDS	Expression Difference	8559793	8561936	1782	2	forward	1	-1	-0.325321	0.102633
DOM34 CDS	Expression Difference	9875092	9876252	1161	1	forward	1.1	-1.1	-0.325004	0.084487
FZO1 CDS	Expression Difference	816765	819332	2568	1	reverse	1.5	-1.5	-0.323643	0.0325871
BNR1 CDS	Expression Difference	5434398	5438525	4128	1	forward	1	-1	-0.323572	0.0956427
MCD4 CDS	Expression Difference	6716144	6718903	2760	1	reverse	0.6	-0.6	-0.323104	0.243426
APA2 CDS	Expression Difference	2856813	2857790	978	1	reverse	1.4	-1.4	-0.323097	0.0372105
hypothetical protein CDS	Expression Difference	12067140	12067448	309	1	forward	0.2	-0.2	-0.322932	0.62048
ACM1 CDS	Expression Difference	11161429	11162058	630	1	forward	0.4	-0.4	-0.322818	0.40283
CHL1 CDS	Expression Difference	11662645	11665230	2586	1	forward	1	-1	-0.322331	0.107099
hypothetical protein CDS	Expression Difference	7808820	7809559	681	2	reverse	1.4	-1.4	-0.322176	0.0441646
HUA1 CDS	Expression Difference	4765047	4765643	597	1	reverse	0.9	-0.9	-0.32211	0.138099
OYE2 CDS	Expression Difference	5292432	5293634	1203	1	forward	0.5	-0.5	-0.321872	0.312725
NOP6 CDS	Expression Difference	1437311	1437988	678	1	reverse	0.6	-0.6	-0.320755	0.247637
DBP6 CDS	Expression Difference	9943231	9945120	1890	1	forward	0.6	-0.6	-0.32072	0.236707
FYV8 CDS	Expression Difference	4628723	4631176	2454	1	reverse	1.5	-1.5	-0.320695	0.030027
TAD3 CDS	Expression Difference	8010294	8011386	969	3	reverse	1	-1	-0.32013	0.0997325
ACN9 CDS	Expression Difference	2830039	2830440	402	1	forward	1.3	-1.3	-0.319558	0.045383
SIP4 CDS	Expression Difference	6098387	6100876	2490	1	forward	0.5	-0.5	-0.319409	0.300279
hypothetical protein CDS	Expression Difference	6273455	6275014	1560	1	reverse	0.9	-0.9	-0.319026	0.13165
ERT1 CDS	Expression Difference	928572	930161	1590	1	reverse	0.8	-0.8	-0.317963	0.148788
HPM1 CDS	Expression Difference	5548618	5549751	1134	1	forward	0.6	-0.6	-0.317883	0.253532
MRPL37 CDS	Expression Difference	971517	971834	318	1	forward	0.9	-0.9	-0.317427	0.130191
RAD10 CDS	Expression Difference	8404686	8405318	633	1	reverse	0.6	-0.6	-0.317328	0.254313
YTH1 CDS	Expression Difference	11864698	11865324	627	1	reverse	1.1	-1.1	-0.316645	0.0762542
YPT35 CDS	Expression Difference	5154696	5155340	645	1	forward	0.5	-0.5	-0.316511	0.351695
ALG1 CDS	Expression Difference	689090	690439	1350	1	forward	1.1	-1.1	-0.316463	0.0750061
FMP37 CDS	Expression Difference	4097626	4098018	393	1	forward	1	-1	-0.316139	0.0917617
PEX27 CDS	Expression Difference	10742415	10743545	1131	1	forward	0.9	-0.9	-0.316085	0.119277
RNA1 CDS	Expression Difference	9064717	9065940	1224	1	reverse	0.8	-0.8	-0.316012	0.157366
hypothetical protein CDS	Expression Difference	10920489	10920719	231	1	reverse	1	-1	-0.315715	0.0988257
ERG1 CDS	Expression Difference	4585923	4587413	1491	1	reverse	0.8	-0.8	-0.315618	0.174323
hypothetical protein CDS	Expression Difference	9666650	9667462	813	1	reverse	1	-1	-0.315606	0.0980273
IKI3 CDS	Expression Difference	8133879	8137928	4050	1	reverse	0.8	-0.8	-0.315212	0.165781
KEL2 CDS	Expression Difference	4705029	4707677	2649	1	reverse	0.6	-0.6	-0.315058	0.273359
MAL33 CDS	Expression Difference	1030741	1032147	1407	1	forward	0.9	-0.9	-0.314986	0.130756
TAF4 CDS	Expression Difference	8599250	8600416	1167	1	forward	1.4	-1.4	-0.314926	0.0358105
JAC1 CDS	Expression Difference	4198100	4198654	555	1	reverse	0.9	-0.9	-0.314505	0.11459
MNL1 CDS	Expression Difference	5336249	5338639	2391	1	forward	1.1	-1.1	-0.314501	0.072676
DAS2 CDS	Expression Difference	1845768	1846466	699	1	reverse	0.5	-0.5	-0.314268	0.299029
SFH5 CDS	Expression Difference	5977621	5978505	885	1	forward	0.6	-0.6	-0.314234	0.23343
BUD21 CDS	Expression Difference	10504694	10505338	645	1	forward	0.7	-0.7	-0.313152	0.217892
hypothetical protein CDS	Expression Difference	9285336	9286190	855	1	forward	0.8	-0.8	-0.312826	0.142622
DIS3 CDS	Expression Difference	10314390	10317395	3006	1	reverse	1.3	-1.3	-0.312462	0.048487
PRI2 CDS	Expression Difference	6931705	6933291	1587	1	forward	0.6	-0.6	-0.3124	0.230495
TRM12 CDS	Expression Difference	8583426	8584814	1389	1	forward	0.5	-0.5	-0.312169	0.288789
FIT3 CDS	Expression Difference	11092410	11093024	615	1	reverse	0.2	-0.2	-0.311783	0.639362
CDC14 CDS	Expression Difference	3677242	3678897	1656	1	reverse	0.8	-0.8	-0.311768	0.154641
RIC1 CDS	Expression Difference	7470454	7473624	3171	1	reverse	1	-1	-0.311608	0.105147
hypothetical protein CDS	Expression Difference	2994536	2998102	3567	1	reverse	1.1	-1.1	-0.311565	0.0751449
GIR2 CDS	Expression Difference	2125728	2126525	798	1	forward	0.8	-0.8	-0.311449	0.165037
ALD4 CDS	Expression Difference	11071809	11073368	1560	1	forward	0.3	-0.3	-0.311024	0.526295
gag protein CDS	Expression Difference	9348546	9349868	1323	1	reverse	0.5	-0.5	-0.310562	0.337528
SAM50 CDS	Expression Difference	9829556	9831010	1455	1	forward	1.3	-1.3	-0.310525	0.0449807
GYL1 CDS	Expression Difference	8970323	8972485	2163	1	forward	0.9	-0.9	-0.309971	0.113225
SRL3 CDS	Expression Difference	7189737	7190477	741	1	forward	0.6	-0.6	-0.309741	0.274878
MSA2 CDS	Expression Difference	7161865	7162956	1092	1	forward	0.5	-0.5	-0.30948	0.285383
RFA2 CDS	Expression Difference	9295923	9296852	822	2	forward	0.7	-0.7	-0.309291	0.216117
AAR2 CDS	Expression Difference	316940	318007	1068	1	reverse	0.5	-0.5	-0.308907	0.331928
GCS1 CDS	Expression Difference	1411137	1412195	1059	1	reverse	1.1	-1.1	-0.307518	0.0880457
hypothetical protein CDS	Expression Difference	6725842	6727050	1209	1	reverse	0.5	-0.5	-0.307312	0.354408
SVL3 CDS	Expression Difference	11612147	11614624	2478	1	reverse	0.8	-0.8	-0.305514	0.157488
ENV10 CDS	Expression Difference	7511401	7511946	546	1	reverse	0.5	-0.5	-0.305291	0.290372
CHS6 CDS	Expression Difference	6071875	6074115	2241	1	forward	0.9	-0.9	-0.305163	0.11829
PUS4 CDS	Expression Difference	9330442	9331653	1212	1	forward	0.7	-0.7	-0.305121	0.193626
RNH70 CDS	Expression Difference	4782809	4784470	1662	1	reverse	1.3	-1.3	-0.304867	0.0525577
PIG1 CDS	Expression Difference	7934111	7936057	1947	1	reverse	0.6	-0.6	-0.304622	0.237996
RNP1 CDS	Expression Difference	7291742	7292491	750	1	reverse	0.3	-0.3	-0.304422	0.526972
VPS74 CDS	Expression Difference	2581134	2582171	1038	1	reverse	0.7	-0.7	-0.304309	0.222684
RRI1 CDS	Expression Difference	1429019	1430341	1323	1	reverse	0.6	-0.6	-0.303807	0.235854
CBS2 CDS	Expression Difference	2211250	2212419	1170	1	forward	0.8	-0.8	-0.303624	0.147149
gag-pol fusion protein CDS	Expression Difference	2341484	2346797	5313	2	forward	0.9	-0.9	-0.303265	0.128966
AIR2 CDS	Expression Difference	1504506	1505540	1035	1	reverse	1	-1	-0.302062	0.109135
RRP43 CDS	Expression Difference	1235236	1236420	1185	1	reverse	0.9	-0.9	-0.302044	0.124778
hypothetical protein CDS	Expression Difference	6667496	6669748	2253	1	reverse	0.3	-0.3	-0.302022	0.464165
FRA2 CDS	Expression Difference	3821364	3821726	363	1	forward	0.5	-0.5	-0.301457	0.295585
TOP2 CDS	Expression Difference	9705340	9709626	4287	1	forward	0.8	-0.8	-0.30106	0.156011
DSS4 CDS	Expression Difference	11716746	11717177	432	1	reverse	0.6	-0.6	-0.29961	0.267566
CEF1 CDS	Expression Difference	9016586	9018358	1773	1	forward	0.8	-0.8	-0.299573	0.141622
AYT1 CDS	Expression Difference	7259676	7261100	1425	1	reverse	0.8	-0.8	-0.299483	0.155706
AKR1 CDS	Expression Difference	2356051	2358345	2295	1	reverse	0.8	-0.8	-0.299354	0.174877
hypothetical protein CDS	Expression Difference	892717	893521	384	2	reverse	0.8	-0.8	-0.298897	0.172258
PIM1 CDS	Expression Difference	408092	411493	3402	1	reverse	0.8	-0.8	-0.298769	0.174952
hypothetical protein CDS	Expression Difference	2301079	2303442	2364	1	reverse	0.7	-0.7	-0.298241	0.186663
PZF1 CDS	Expression Difference	12032993	12034282	1290	1	reverse	0.8	-0.8	-0.298156	0.167588
RIF2 CDS	Expression Difference	8286827	8288014	1188	1	reverse	0.6	-0.6	-0.297038	0.249571
MMS1 CDS	Expression Difference	11993963	11998186	4224	1	forward	0.7	-0.7	-0.296742	0.182308
BPL1 CDS	Expression Difference	1563061	1565133	2073	1	forward	0.8	-0.8	-0.296491	0.169141
NAM7 CDS	Expression Difference	8749917	8752832	2916	1	reverse	1	-1	-0.296359	0.0912346
CTS2 CDS	Expression Difference	2579435	2580970	1536	1	forward	0.7	-0.7	-0.296035	0.188499
YML6 CDS	Expression Difference	8547611	8548570	861	2	reverse	0.6	-0.6	-0.295992	0.231387
KSS1 CDS	Expression Difference	4314388	4315494	1107	1	forward	0.4	-0.4	-0.295917	0.374636
SVP26 CDS	Expression Difference	5297158	5297844	687	1	forward	0.6	-0.6	-0.29574	0.260253
TMA7 CDS	Expression Difference	7914496	7914690	195	1	reverse	0.6	-0.6	-0.295627	0.226174
HAM1 CDS	Expression Difference	6401267	6401860	594	1	reverse	0.5	-0.5	-0.295294	0.297602
TKL1 CDS	Expression Difference	11816056	11818098	2043	1	reverse	1.2	-1.2	-0.295167	0.0660542
putative lipase CDS	Expression Difference	1625280	1627223	1944	1	reverse	0.5	-0.5	-0.294642	0.339333
GPI10 CDS	Expression Difference	3975259	3977109	1851	1	reverse	0.7	-0.7	-0.294382	0.20418
CCT2 CDS	Expression Difference	5475875	5477458	1584	1	forward	1	-1	-0.294259	0.0909306
MCM7 CDS	Expression Difference	855990	858527	2538	1	forward	0.9	-0.9	-0.293647	0.130477
LDB18 CDS	Expression Difference	7285694	7286233	540	1	forward	0.7	-0.7	-0.293488	0.191954
USB1 CDS	Expression Difference	7652311	7653183	873	1	reverse	0.6	-0.6	-0.292681	0.26421
GDT1 CDS	Expression Difference	832852	833694	843	1	forward	0.5	-0.5	-0.292449	0.323812
CHS7 CDS	Expression Difference	5213468	5214418	951	1	forward	1.2	-1.2	-0.292318	0.0690778
TRF5 CDS	Expression Difference	9314153	9316081	1929	1	forward	0.6	-0.6	-0.292187	0.234557
BCH2 CDS	Expression Difference	7069576	7071873	2298	1	forward	0.9	-0.9	-0.291715	0.137992
GIN4 CDS	Expression Difference	2822380	2825808	3429	1	reverse	0.6	-0.6	-0.291708	0.243707
AIP1 CDS	Expression Difference	8774837	8776684	1848	1	reverse	0.9	-0.9	-0.291545	0.13262
MRPL4 CDS	Expression Difference	8259519	8260478	960	1	forward	0.5	-0.5	-0.290812	0.325788
CLD1 CDS	Expression Difference	4452699	4454036	1338	1	forward	0.5	-0.5	-0.290771	0.349122
DIA3 CDS	Expression Difference	1768473	1769879	1407	1	reverse	0.3	-0.3	-0.290102	0.488163
VBA5 CDS	Expression Difference	7236928	7238676	1749	1	reverse	0	0	-0.290052	NA
hypothetical protein CDS	Expression Difference	10001361	10002671	1311	1	reverse	0.7	-0.7	-0.290011	0.188474
SCL1 CDS	Expression Difference	4213479	4214237	759	1	reverse	0.7	-0.7	-0.289521	0.21908
ERG6 CDS	Expression Difference	8575044	8576195	1152	1	reverse	1.2	-1.2	-0.289171	0.0641841
KAE1 CDS	Expression Difference	7090211	7091371	1161	1	reverse	1.1	-1.1	-0.288823	0.0858238
GET3 CDS	Expression Difference	1642134	1643198	1065	1	reverse	0.6	-0.6	-0.288255	0.255631
CCT4 CDS	Expression Difference	1560018	1561604	1587	1	forward	0.8	-0.8	-0.287494	0.162236
TIM23 CDS	Expression Difference	9910549	9911217	669	1	forward	0.6	-0.6	-0.28686	0.230466
YSC83 CDS	Expression Difference	4968624	4969781	1158	1	forward	0.7	-0.7	-0.286335	0.187474
CCS1 CDS	Expression Difference	8670716	8671465	750	1	reverse	0.7	-0.7	-0.284676	0.221084
KTI11 CDS	Expression Difference	320196	320444	249	1	forward	0.7	-0.7	-0.284332	0.222999
SPO16 CDS	Expression Difference	5232016	5232612	597	1	reverse	0.5	-0.5	-0.283869	0.315054
HRB1 CDS	Expression Difference	9870551	9872257	1365	2	forward	1.1	-1.1	-0.283727	0.0858466
hypothetical protein CDS	Expression Difference	10333016	10333207	192	1	forward	0.2	-0.2	-0.283678	0.63856
AIM39 CDS	Expression Difference	10262054	10263241	1188	1	forward	0.5	-0.5	-0.282673	0.327642
SRM1 CDS	Expression Difference	4060772	4062220	1449	1	forward	0.8	-0.8	-0.282571	0.172662
HCM1 CDS	Expression Difference	1272712	1274406	1695	1	forward	0.4	-0.4	-0.282251	0.374164
MKT1 CDS	Expression Difference	9714767	9717259	2493	1	forward	0.7	-0.7	-0.282115	0.197955
hypothetical protein CDS	Expression Difference	4261251	4261823	573	1	forward	0.4	-0.4	-0.281957	0.42288
PXL1 CDS	Expression Difference	7187158	7189278	2121	1	forward	0.8	-0.8	-0.281472	0.160619
STO1 CDS	Expression Difference	8840744	8843651	2586	2	forward	1.1	-1.1	-0.280846	0.0831347
YEH2 CDS	Expression Difference	7426817	7428433	1617	1	reverse	0.8	-0.8	-0.280474	0.156405
LDB19 CDS	Expression Difference	10950575	10953031	2457	1	reverse	1	-1	-0.280406	0.108224
WHI5 CDS	Expression Difference	10511502	10512389	888	1	forward	0.4	-0.4	-0.280211	0.383816
COX11 CDS	Expression Difference	11424976	11425878	903	1	forward	0.8	-0.8	-0.280121	0.173293
GRH1 CDS	Expression Difference	2837261	2838379	1119	1	forward	0.8	-0.8	-0.27999	0.17656
LDB16 CDS	Expression Difference	1151423	1152193	771	1	forward	0.7	-0.7	-0.27981	0.179335
MSS116 CDS	Expression Difference	2205974	2207968	1995	1	reverse	1.2	-1.2	-0.279096	0.0683021
ERG13 CDS	Expression Difference	8342265	8343740	1476	1	reverse	0.8	-0.8	-0.278953	0.168046
ZRC1 CDS	Expression Difference	9078043	9079371	1329	1	reverse	1	-1	-0.278582	0.0979023
LOT6 CDS	Expression Difference	7414131	7414706	576	1	forward	0.5	-0.5	-0.278335	0.303443
TRX1 CDS	Expression Difference	7476730	7477041	312	1	reverse	0.7	-0.7	-0.277654	0.191982
LAG1 CDS	Expression Difference	4930578	4931813	1236	1	reverse	0.6	-0.6	-0.277591	0.262155
PPG1 CDS	Expression Difference	9933646	9934752	1107	1	forward	0.9	-0.9	-0.277564	0.120942
SKI7 CDS	Expression Difference	10501346	10503589	2244	1	reverse	1	-1	-0.277191	0.0901424
POP7 CDS	Expression Difference	801686	802108	423	1	reverse	0.6	-0.6	-0.276896	0.2806
NFU1 CDS	Expression Difference	6939270	6940040	771	1	reverse	0.7	-0.7	-0.276717	0.217862
SCD6 CDS	Expression Difference	11915947	11916996	1050	1	forward	0.6	-0.6	-0.276524	0.239202
DAN4 CDS	Expression Difference	6544716	6548201	3486	1	reverse	0.5	-0.5	-0.275503	0.333323
YND1 CDS	Expression Difference	3052505	3054397	1893	1	forward	0.8	-0.8	-0.275265	0.147588
BUR2 CDS	Expression Difference	7834382	7835569	1188	1	forward	0.9	-0.9	-0.275223	0.126453
TIF34 CDS	Expression Difference	8880686	8881729	1044	1	reverse	0.9	-0.9	-0.274941	0.118792
SBH2 CDS	Expression Difference	3086228	3086494	267	1	reverse	0.6	-0.6	-0.2746	0.229238
NIP1 CDS	Expression Difference	9216193	9218631	2439	1	reverse	0.4	-0.4	-0.274487	0.372184
hypothetical protein CDS	Expression Difference	7449253	7449813	561	1	forward	0.3	-0.3	-0.273774	0.451051
LUC7 CDS	Expression Difference	1660236	1661021	786	1	reverse	0.5	-0.5	-0.273738	0.34181
hypothetical protein CDS	Expression Difference	11598378	11599001	624	1	reverse	0.7	-0.7	-0.273202	0.192142
RRN5 CDS	Expression Difference	7668711	7669802	1092	1	forward	0.7	-0.7	-0.272707	0.1997
hypothetical protein CDS	Expression Difference	11820407	11821525	1119	1	reverse	0.3	-0.3	-0.272679	0.546247
CWC24 CDS	Expression Difference	8023201	8023980	780	1	reverse	0.6	-0.6	-0.271879	0.226638
hypothetical protein CDS	Expression Difference	8633413	8634957	1545	1	forward	0.3	-0.3	-0.271749	0.453126
MRL1 CDS	Expression Difference	11822129	11823274	1146	1	forward	0.8	-0.8	-0.271469	0.166903
SPC42 CDS	Expression Difference	6936687	6937778	1092	1	forward	0.5	-0.5	-0.271385	0.302686
hypothetical protein CDS	Expression Difference	192337	192417	81	1	reverse	0.2	-0.2	-0.271196	0.692608
putative haloacid dehalogenase-like hydrolase CDS	Expression Difference	10604151	10604807	657	1	reverse	0.6	-0.6	-0.270834	0.223903
PNO1 CDS	Expression Difference	10637316	10638140	825	1	reverse	0.6	-0.6	-0.270525	0.267407
BST1 CDS	Expression Difference	3552974	3556063	3090	1	reverse	0.9	-0.9	-0.270324	0.117781
POR2 CDS	Expression Difference	5541716	5542561	846	1	reverse	1.1	-1.1	-0.270048	0.08211
TRS31 CDS	Expression Difference	2763344	2764195	852	1	forward	0.9	-0.9	-0.269906	0.126907
MRE11 CDS	Expression Difference	9041780	9043858	2079	1	reverse	0.9	-0.9	-0.269836	0.1314
RPO41 CDS	Expression Difference	3527611	3531666	4056	1	forward	1	-1	-0.269677	0.0947607
UBP14 CDS	Expression Difference	583890	586235	2346	1	reverse	1.1	-1.1	-0.269219	0.0789703
putative phosphotransferase CDS	Expression Difference	2033542	2035689	2148	1	reverse	1.2	-1.2	-0.26912	0.0601511
hypothetical protein CDS	Expression Difference	4761646	4763751	2106	1	forward	0.8	-0.8	-0.268953	0.159808
hypothetical protein CDS	Expression Difference	1359399	1359590	192	1	reverse	0.2	-0.2	-0.268447	0.68005
BIK1 CDS	Expression Difference	1112001	1113323	1323	1	reverse	0.8	-0.8	-0.268383	0.143129
PXA1 CDS	Expression Difference	11396515	11399127	2613	1	forward	0.5	-0.5	-0.267804	0.302896
hypothetical protein CDS	Expression Difference	11867949	11868833	885	1	forward	0.8	-0.8	-0.267673	0.177058
HUA2 CDS	Expression Difference	10880447	10881178	732	1	forward	0.5	-0.5	-0.267567	0.299849
TIM22 CDS	Expression Difference	1428005	1428628	624	1	reverse	0.7	-0.7	-0.266927	0.17944
hypothetical protein CDS	Expression Difference	6899227	6899730	504	1	reverse	1.1	-1.1	-0.265151	0.0840304
MSH5 CDS	Expression Difference	1538356	1541061	2706	1	forward	0.8	-0.8	-0.264417	0.159264
SRY1 CDS	Expression Difference	6595571	6596551	981	1	reverse	0.3	-0.3	-0.264295	0.531605
NUP49 CDS	Expression Difference	3919690	3921108	1419	1	forward	1	-1	-0.264062	0.104787
IST3 CDS	Expression Difference	5757462	5757908	447	1	forward	0.6	-0.6	-0.263297	0.269038
SEC65 CDS	Expression Difference	8381071	8381892	822	1	reverse	0.6	-0.6	-0.262612	0.24057
MED11 CDS	Expression Difference	8817305	8817700	396	1	reverse	0.5	-0.5	-0.262501	0.284296
BFR1 CDS	Expression Difference	10750622	10752034	1413	1	reverse	0.4	-0.4	-0.261657	0.357251
gag protein CDS	Expression Difference	4305135	4306457	1323	1	reverse	0.6	-0.6	-0.261506	0.279486
TVP15 CDS	Expression Difference	2015035	2015466	432	1	forward	0.7	-0.7	-0.261119	0.210133
TAF12 CDS	Expression Difference	2106760	2108379	1620	1	forward	0.8	-0.8	-0.260918	0.165267
PRD1 CDS	Expression Difference	1068170	1070308	2139	1	forward	0.7	-0.7	-0.260267	0.202293
CNE1 CDS	Expression Difference	37464	38972	1509	1	forward	0.9	-0.9	-0.260248	0.134942
hypothetical protein CDS	Expression Difference	5565938	5566165	228	1	reverse	0.7	-0.7	-0.260139	0.20799
hypothetical protein CDS	Expression Difference	8815609	8816997	1389	1	reverse	0.8	-0.8	-0.260132	0.153299
UBC12 CDS	Expression Difference	7989179	7989879	567	2	forward	0.7	-0.7	-0.259642	0.220869
CLB3 CDS	Expression Difference	1536795	1538078	1284	1	forward	1.1	-1.1	-0.258904	0.0791511
DUS4 CDS	Expression Difference	8174817	8175920	1104	1	forward	1	-1	-0.258454	0.0961743
PTC1 CDS	Expression Difference	1799931	1800776	846	1	forward	0.8	-0.8	-0.258263	0.168136
MEF1 CDS	Expression Difference	7516658	7518943	2286	1	reverse	0.9	-0.9	-0.25822	0.120788
POP2 CDS	Expression Difference	9966982	9968283	1302	1	reverse	0.8	-0.8	-0.258088	0.158516
hypothetical protein CDS	Expression Difference	11532628	11533350	723	1	reverse	0.5	-0.5	-0.25762	0.353195
hypothetical protein CDS	Expression Difference	6374253	6374963	711	1	reverse	0.7	-0.7	-0.257206	0.192001
HXT4 CDS	Expression Difference	5117011	5118741	1731	1	reverse	0.2	-0.2	-0.256443	0.607875
CDC73 CDS	Expression Difference	8201942	8203123	1182	1	reverse	0.8	-0.8	-0.256398	0.170506
SNM1 CDS	Expression Difference	2774597	2775193	597	1	forward	0.5	-0.5	-0.256205	0.339458
LSM1 CDS	Expression Difference	6019587	6020105	519	1	reverse	0.7	-0.7	-0.256152	0.180687
GLG1 CDS	Expression Difference	7130982	7132832	1851	1	forward	0.4	-0.4	-0.255905	0.40517
PAC11 CDS	Expression Difference	2789210	2790811	1602	1	reverse	0.4	-0.4	-0.255528	0.382545
TMN2 CDS	Expression Difference	2029038	2031056	2019	1	reverse	0.6	-0.6	-0.255519	0.246192
YSH1 CDS	Expression Difference	7942184	7944523	2340	1	reverse	1	-1	-0.255326	0.111845
MRP17 CDS	Expression Difference	7015309	7015704	396	1	reverse	1	-1	-0.255175	0.0980305
hypothetical protein CDS	Expression Difference	3463110	3463478	369	1	forward	0.2	-0.2	-0.254993	0.651087
hypothetical protein CDS	Expression Difference	9540193	9540519	327	1	reverse	0.5	-0.5	-0.254886	0.312496
TGS1 CDS	Expression Difference	11378074	11379021	948	1	forward	0.7	-0.7	-0.254353	0.208227
MRP7 CDS	Expression Difference	9868949	9870064	1116	1	reverse	0.9	-0.9	-0.254145	0.140407
RFC2 CDS	Expression Difference	6400104	6401165	1062	1	forward	0.5	-0.5	-0.254139	0.290592
POP6 CDS	Expression Difference	4284671	4285147	477	1	reverse	0.8	-0.8	-0.253677	0.162779
gag protein CDS	Expression Difference	5377840	5379276	1437	1	reverse	0.6	-0.6	-0.253525	0.270681
MRPL25 CDS	Expression Difference	4376094	4376567	474	1	reverse	0.6	-0.6	-0.253404	0.243642
hypothetical protein CDS	Expression Difference	10400096	10402288	2193	1	forward	0.3	-0.3	-0.252992	0.50209
ATG12 CDS	Expression Difference	888050	888610	561	1	forward	0.6	-0.6	-0.252853	0.274494
RSM7 CDS	Expression Difference	6470693	6471436	744	1	reverse	0.4	-0.4	-0.252798	0.4067
RPN7 CDS	Expression Difference	11865714	11867003	1290	1	forward	0.5	-0.5	-0.252759	0.294632
RGP1 CDS	Expression Difference	2088281	2090272	1992	1	forward	0.6	-0.6	-0.252744	0.226341
FLD1 CDS	Expression Difference	8173771	8174628	858	1	forward	0.5	-0.5	-0.252488	0.339062
hypothetical protein CDS	Expression Difference	179281	179820	540	1	reverse	0.5	-0.5	-0.252052	0.336114
SEC13 CDS	Expression Difference	7804579	7805472	894	1	forward	0.8	-0.8	-0.251556	0.150028
NUP116 CDS	Expression Difference	8686569	8689910	3342	1	reverse	0.9	-0.9	-0.250179	0.132824
RUP1 CDS	Expression Difference	10616278	10618293	2016	1	reverse	0.9	-0.9	-0.250136	0.131324
CSL4 CDS	Expression Difference	9462559	9463437	879	1	forward	0.4	-0.4	-0.250086	0.366077
HAP5 CDS	Expression Difference	11042130	11042858	729	1	forward	0.6	-0.6	-0.249922	0.241681
MRP49 CDS	Expression Difference	6711933	6712346	414	1	reverse	0.9	-0.9	-0.249736	0.1338
MKK1 CDS	Expression Difference	10804570	10806096	1527	1	forward	0.6	-0.6	-0.249448	0.232198
VPS30 CDS	Expression Difference	11445331	11447004	1674	1	forward	0.7	-0.7	-0.248948	0.178249
MRP4 CDS	Expression Difference	4929149	4930333	1185	1	forward	0.5	-0.5	-0.248609	0.304783
MRPL32 CDS	Expression Difference	1162022	1162573	552	1	forward	0.8	-0.8	-0.248545	0.168328
GWT1 CDS	Expression Difference	6093541	6095013	1473	1	reverse	0.4	-0.4	-0.247547	0.355781
NUP192 CDS	Expression Difference	6201209	6206260	5052	1	reverse	0.6	-0.6	-0.247257	0.271529
BUD23 CDS	Expression Difference	1254120	1254947	828	1	reverse	0.5	-0.5	-0.247084	0.345319
[truncated: 3,888 more rows]
